# Supplementary material
Source: PubMed Central journal article supplement (PMC5733704)
Supplement: NIHMS922061-supplement-2.pdf [file NIHMS922061-supplement-2.pdf]

**A Novel Series of Enoyl Reductase Inhibitors Targeting the ESKAPE  
Pathogens, *Staphylococcus aureus* and *Acinetobacter baumannii***

Jieun Kwon,<sup>a</sup> Tina Mistry,<sup>a</sup> + Jinhong Ren,<sup>b</sup> Michael E. Johnson,<sup>a,b,\*</sup> and Shahila Mehboob<sup>a,\*</sup>

**Supplementary Data**

Table S1: Calculated  $K_i$  values for N-carboxy pyrrolidine analogs

| Compound | SaFabI                         |                              | AbFabI                         |                              | Compound | SaFabI                         |                              | AbFabI                         |                              |
|----------|--------------------------------|------------------------------|--------------------------------|------------------------------|----------|--------------------------------|------------------------------|--------------------------------|------------------------------|
|          | IC <sub>50</sub><br>( $\mu$ M) | K <sub>i</sub><br>( $\mu$ M) | IC <sub>50</sub><br>( $\mu$ M) | K <sub>i</sub><br>( $\mu$ M) |          | IC <sub>50</sub><br>( $\mu$ M) | K <sub>i</sub><br>( $\mu$ M) | IC <sub>50</sub><br>( $\mu$ M) | K <sub>i</sub><br>( $\mu$ M) |
| 1        | 10.7                           | 4.0                          | 3.1                            | 1.6                          | 16       | 1.8                            | 0.7                          | >200                           | >100                         |
| 2        | 5.0                            | 1.9                          | 3.9                            | 2.0                          | 17       | >100                           | >37.1                        | >100                           | >50                          |
| 3        | 4.6                            | 1.7                          | 2.1                            | 1.1                          | 18       | >100                           | >37.1                        | >100                           | >50                          |
| 4        | 7.3                            | 2.7                          | 9.3                            | 4.7                          | 19       | >100                           | >37.1                        | >100                           | >50                          |
| 5        | 3.0                            | 1.1                          | 7.4                            | 3.7                          | 20       | >100                           | >37.1                        | >100                           | >50                          |
| 6        | 1.9                            | 0.7                          | 6.9                            | 3.5                          | 21       | >100                           | >37.1                        | >100                           | >50                          |
| 7        | 5.7                            | 2.1                          | 3.0                            | 1.5                          | 22       | >100                           | >37.1                        | >100                           | >50                          |
| 8        | 0.5                            | 0.2                          | 3.6                            | 1.8                          | 23       | 1.2                            | 0.4                          | 0.5                            | 0.2                          |
| 9        | 12.5                           | 4.6                          | >200                           | >100                         | 24       | 3.5                            | 1.3                          | 0.4                            | 0.2                          |
| 10       | 18.4                           | 6.8                          | 30.7                           | 15.4                         | 25       | 3.6                            | 1.3                          | >200                           | >100                         |
| 11       | 6.0                            | 2.2                          | 14.0                           | 7.0                          | 26       | 1.1                            | 0.4                          | 8.5                            | 4.3                          |
| 12       | 2.5                            | 0.9                          | 7.8                            | 3.9                          | 27       | 4.5                            | 1.7                          | 20.0                           | 10.0                         |
| 13       | 2.7                            | 1.0                          | 32.0                           | 16.0                         | 28       | 28.4                           | 10.5                         | 7.1                            | 3.6                          |
| 14       | 2.3                            | 0.9                          | 54.0                           | 27.0                         | 29       | >100                           | >37.1                        | >100                           | >50                          |
| 15       | 5.5                            | 2.0                          | 13.7                           | 6.9                          |          |                                |                              |                                |                              |

$K_i$  values were calculated by the Cheng-Prusoff equation for competitive inhibition. We assume the mechanism of inhibition to be competitive as we see that in the crystal structure compound **1** occupies the same region in the active site as known FabI inhibitors that are competitive with the substrate (Mehboob *et al*, *J Med Chem.* **2012**, 55: 5933-41). However, this remains to be confirmed experimentally.

Cheng-Prusoff equation:

$$K_i = IC_{50}/(1 + ([S]/K_m))$$

where [S] (substrate concentration used in the assay) is 400  $\mu$ M for SaFabI and 300  $\mu$ M for AbFabI and substrate  $K_m$  values are 236  $\mu$ M for SaFabI and 300  $\mu$ M for AbFabI.

NMR Spectra and Mass Spectra for each compound discussed in this article are provided herein. This information provides conclusive evidence confirming identity and purity of the compounds. The compounds were rationally designed and then custom synthesized by Life Chemicals. The compound names provided by Life Chemicals appears on each data sheet. Below is the table correlating the compound numbers appearing in the manuscript with the numbers provided by Life Chemicals.

| Compound # | Compound name | % purity as observed by mass spec | identity confirmed by <sup>1</sup> H- NMR | Spectra displayed on page |
|------------|---------------|-----------------------------------|-------------------------------------------|---------------------------|
| 1          | F5831-3142    | >95 %                             | Yes                                       | 4, 5                      |
| 2          | F0687-0495    | >95 %                             | Yes                                       | 6, 7                      |
| 3          | F0687-0499    | >95 %                             | Yes                                       | 8, 9                      |
| 4          | F0687-0497    | >95 %                             | Yes                                       | 10, 11                    |
| 5          | F0687-0501    | >95 %                             | Yes                                       | 12, 13                    |
| 6          | F0687-0496    | >95 %                             | Yes                                       | 14, 15                    |
| 7          | F0687-0500    | >95 %                             | Yes                                       | 16, 17                    |
| 8          | F0687-0473    | >95 %                             | Yes                                       | 18, 19                    |
| 9          | F5831-2782    | >95 %                             | Yes                                       | 20, 21                    |
| 10         | F6395-0086    | >95 %                             | Yes                                       | 22, 23                    |
| 11         | F0687-0483    | >95 %                             | Yes                                       | 24, 25                    |
| 12         | F6518-4222    | >95 %                             | Yes                                       | 26, 27                    |
| 13         | F0687-0502    | >95 %                             | Yes                                       | 28, 29                    |
| 14         | F0687-0503    | >95 %                             | Yes                                       | 30, 31                    |
| 15         | F0687-0504    | >95 %                             | Yes                                       | 32, 33                    |
| 16         | F6518-4339    | >95 %                             | Yes                                       | 34, 35                    |
| 17         | F0687-0489    | >95 %                             | Yes                                       | 36,37                     |
| 18         | F0687-0490    | >95 %                             | Yes                                       | 38, 39                    |
| 19         | F0687-0491    | >95 %                             | Yes                                       | 40, 41                    |
| 20         | F0687-0492    | >95 %                             | Yes                                       | 42, 43                    |
| 21         | F0687-0494    | >95 %                             | Yes                                       | 44, 45                    |
| 22         | F6518-4320    | >95 %                             | Yes                                       | 46, 47                    |
| 23         | F0687-0468    | >95 %                             | Yes                                       | 48, 49                    |
| 24         | F0687-0471    | >95 %                             | Yes                                       | 50, 51                    |
| 25         | F0687-0493    | >95 %                             | Yes                                       | 52, 53                    |
| 26         | F0687-0478    | >95 %                             | Yes                                       | 54, 55                    |
| 27         | F0687-0481    | >95 %                             | Yes                                       | 56, 57                    |
| 28         | F0687-0475    | >95 %                             | Yes                                       | 58, 59                    |
| 29         | F0687-0498    | >95 %                             | Yes                                       | 60, 61                    |

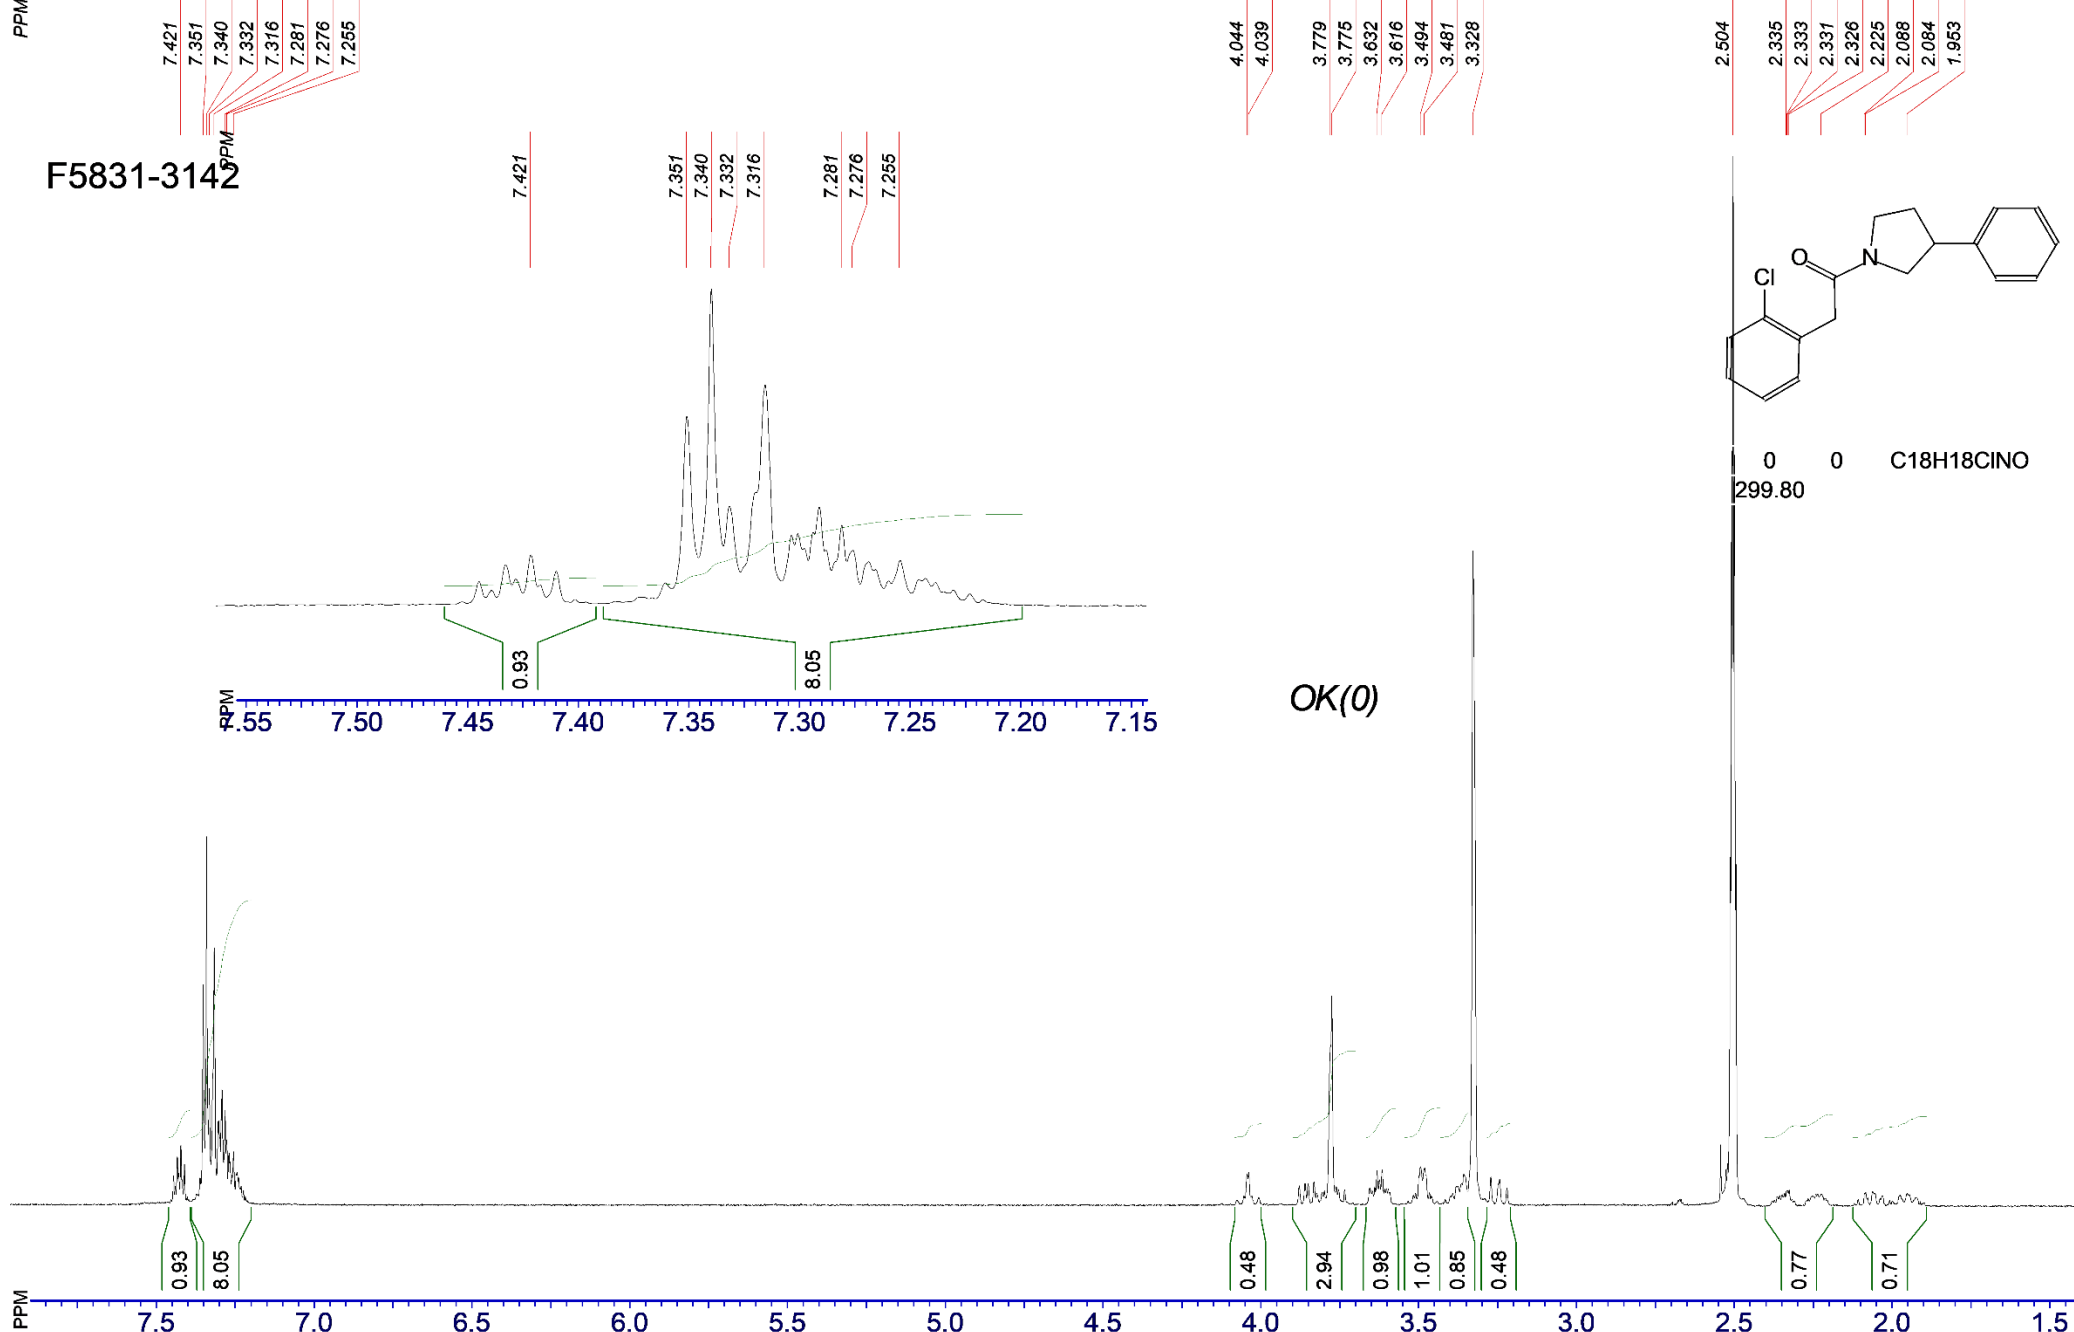

|                       |                    |                                             |                     |                      |
|-----------------------|--------------------|---------------------------------------------|---------------------|----------------------|
| File name: F5831-3142 | Expert: M.Pyanova  | SF: 400.0778 MHz; sw: 8000 Hz; at: 1.50 sec | NS: ; pw: 9,65 usec | SI: 65536, TD: 24000 |
| Date: 10_sep_2015     | Solvent: DMSO 0810 |                                             | TE: 293 K           | block: S16696        |

- .o.- Syntez Purity Report - .o.-

Agilent 1200 LC/MSD  
 Diodearray G1315B (DAD1A-215nm; DAD1B-240nm)  
 Mass Quad G6140A (MSD1-Pos, MSD2-Neg)  
 ELSD Altech 3300 (ADC1 A, ELSD)

Mobile Phase: A-H<sub>2</sub>O+0.1HCOOH; B-MeCN+0.1HCOOH  
 Separation column: **98 %**  
 Rapid Resolutionn HT Cartige 4.6x30mm,  
 1.8-Micron, Zorbax SB-C18

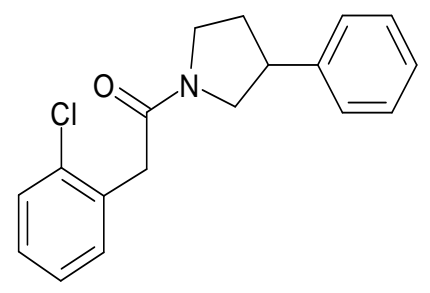

Mol.Weight: 299.8  
 Salt:

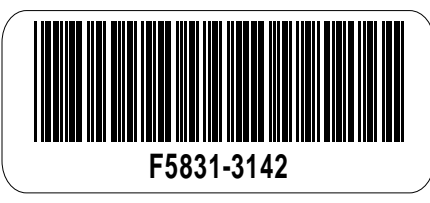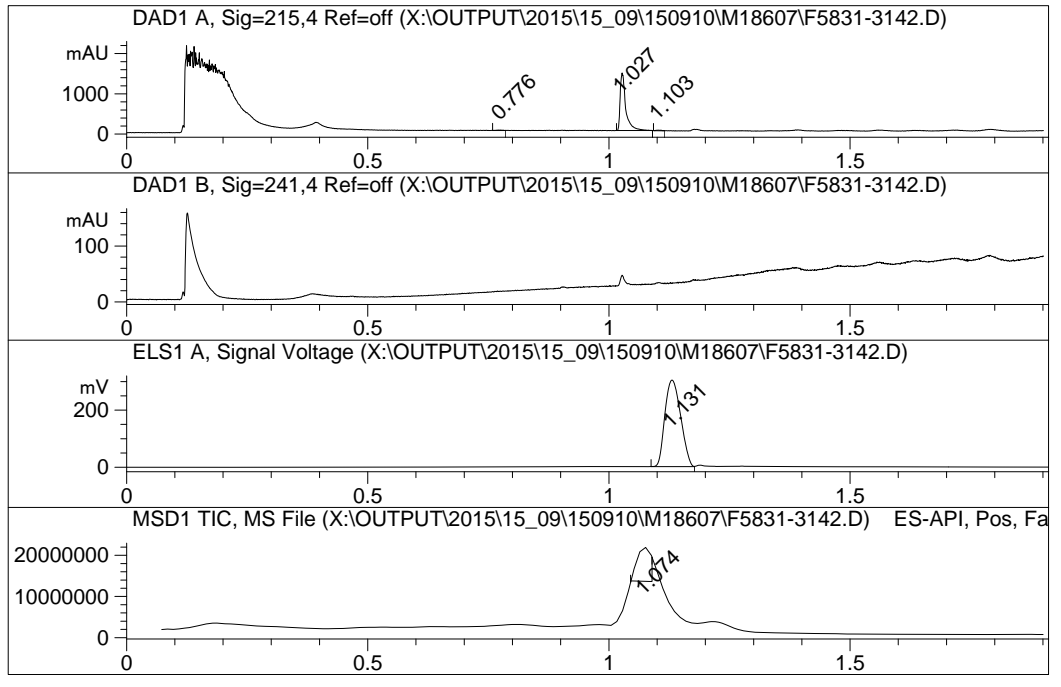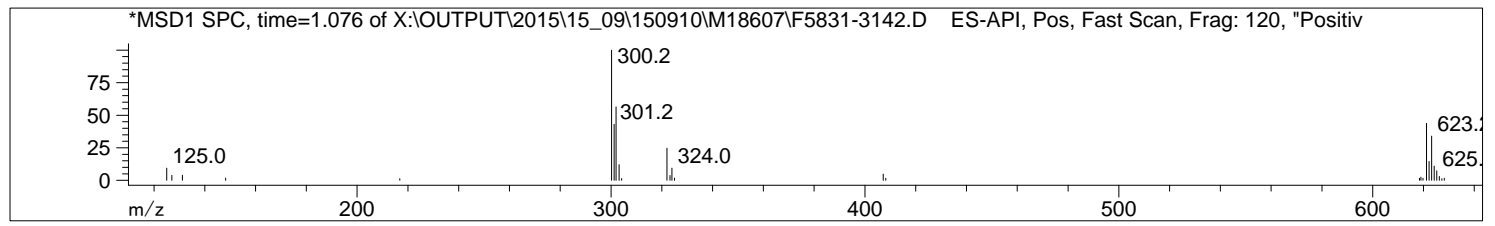

| # | Signal                    | R.Time | Area % |
|---|---------------------------|--------|--------|
| 1 | DAD1 A, Sig=215,4 Ref=off | 0.776  | 0.762  |
| 2 |                           | 1.027  | 98.279 |
| 3 |                           | 1.103  | 0.959  |

  

| # | Signal                 | R.Time | Area %  |
|---|------------------------|--------|---------|
| 1 | ELS1 A, Signal Voltage | 1.131  | 100.000 |

  

| # | Signal            | R.Time | Area %  |
|---|-------------------|--------|---------|
| 1 | MSD1 TIC, MS File | 1.074  | 100.000 |

PPM

F0687-0495

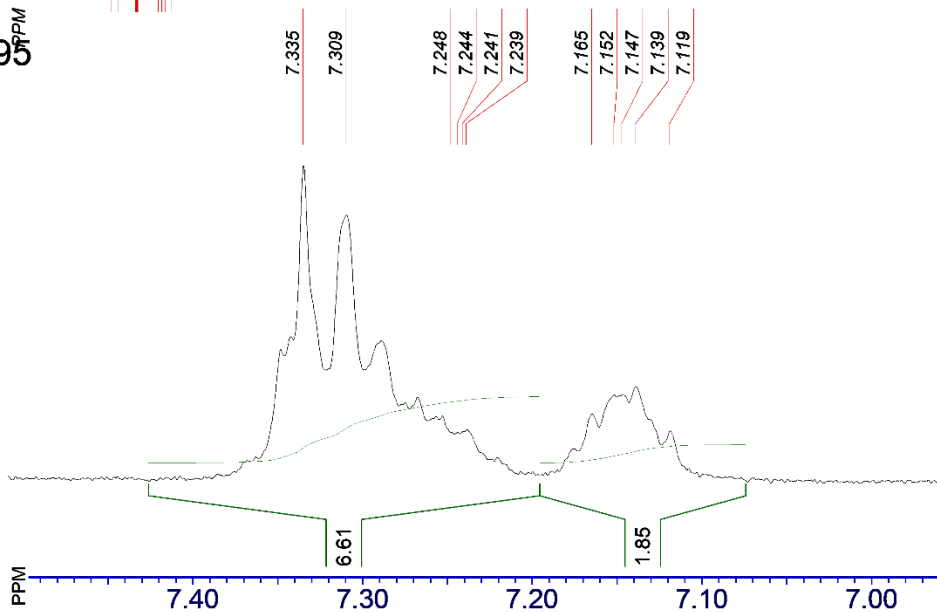

3.696  
3.619  
3.479  
3.469  
3.306  
3.288

2.504

2.220  
2.031  
1.946

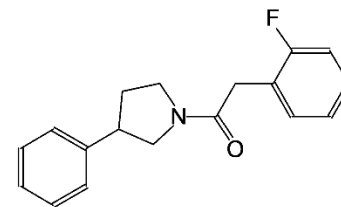

C18H18FNO

283.35

OK(0)

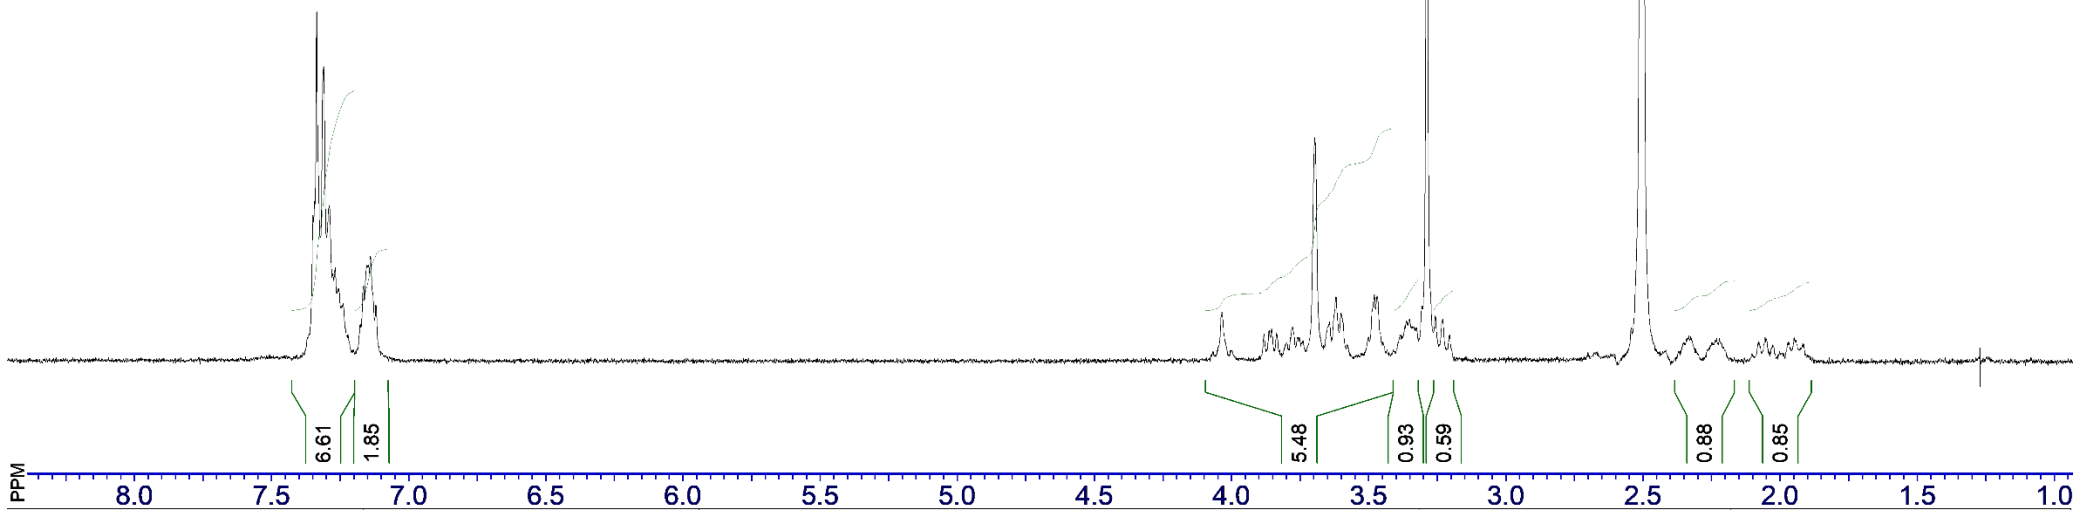

File name: F0687-0495

Expert: M.Pyanova

SF: 400.0778 MHz; sw: 8000 Hz; at: 1.50 sec

NS: ; pw: 9,65 usec

SI: 65536, TD: 24000

Date: 21\_Mar\_2016

Solvent: DMSO 0315

TE: 293 K

block: S18648

- .o.- Syntez Purity Report - .o.-

Agilent 1200 LC/MSD  
 Diodearray G1315B (DAD1A-215nm; DAD1B-240nm)  
 Mass Quad G6140A (MSD1-Pos, MSD2-Neg)  
 ELSD Altech 3300 (ADC1 A, ELSD)

Mobile Phase: A-H2O+0.1HCOOH; B-MeCN+0.1HCOOH  
 Separation column **96 %**  
 Rapid Resolutionn HT Cartige 4.6x30mm,  
 1.8-Micron, Zorbax SB-C18

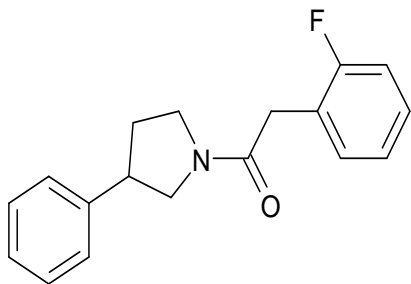

Mol.Weight: 283.34  
 Salt:

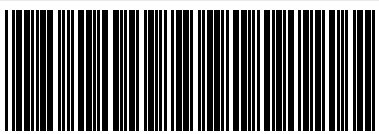

F0687-0495

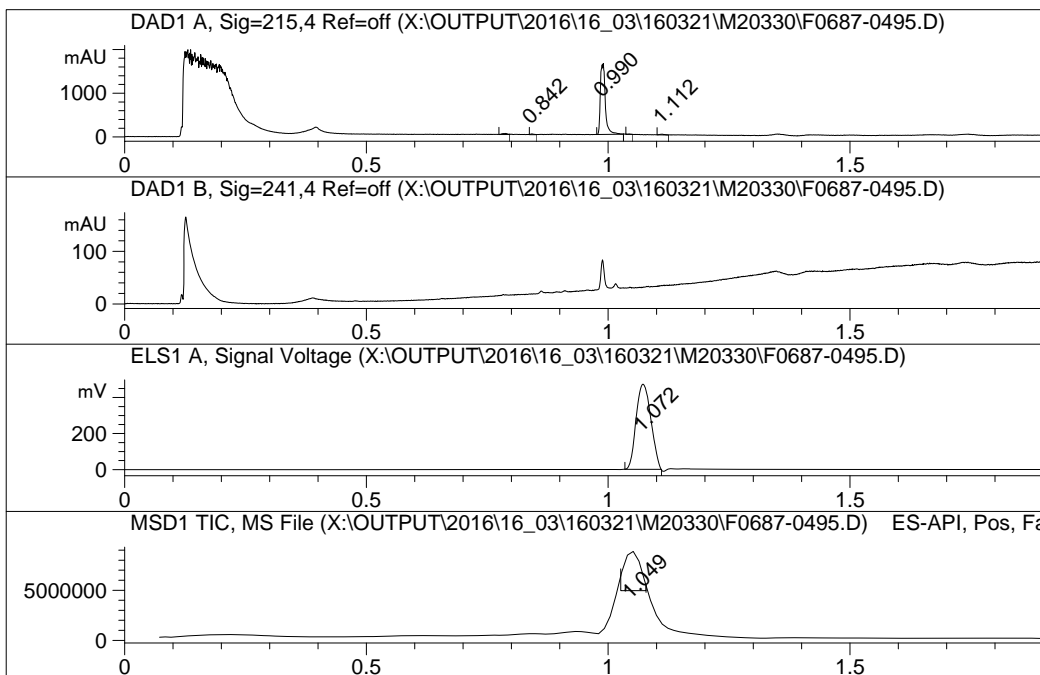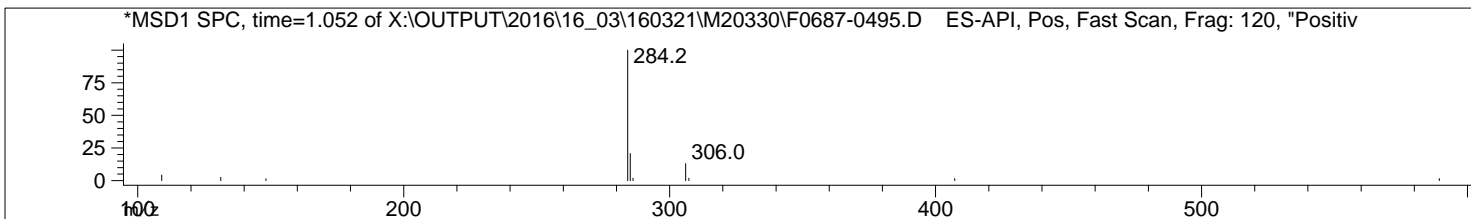

| # | Signal                    | R.Time | Area % |
|---|---------------------------|--------|--------|
| 1 | DAD1 A, Sig=215,4 Ref=off | 0.787  | 1.610  |
| 2 |                           | 0.842  | 0.720  |
| 3 |                           | 0.990  | 96.407 |
| 4 |                           | 1.043  | 0.265  |
| 5 |                           | 1.112  | 0.997  |

| # | Signal                 | R.Time | Area %  |
|---|------------------------|--------|---------|
| 1 | ELS1 A, Signal Voltage | 1.072  | 100.000 |

| # | Signal            | R.Time | Area %  |
|---|-------------------|--------|---------|
| 1 | MSD1 TIC, MS File | 1.049  | 100.000 |

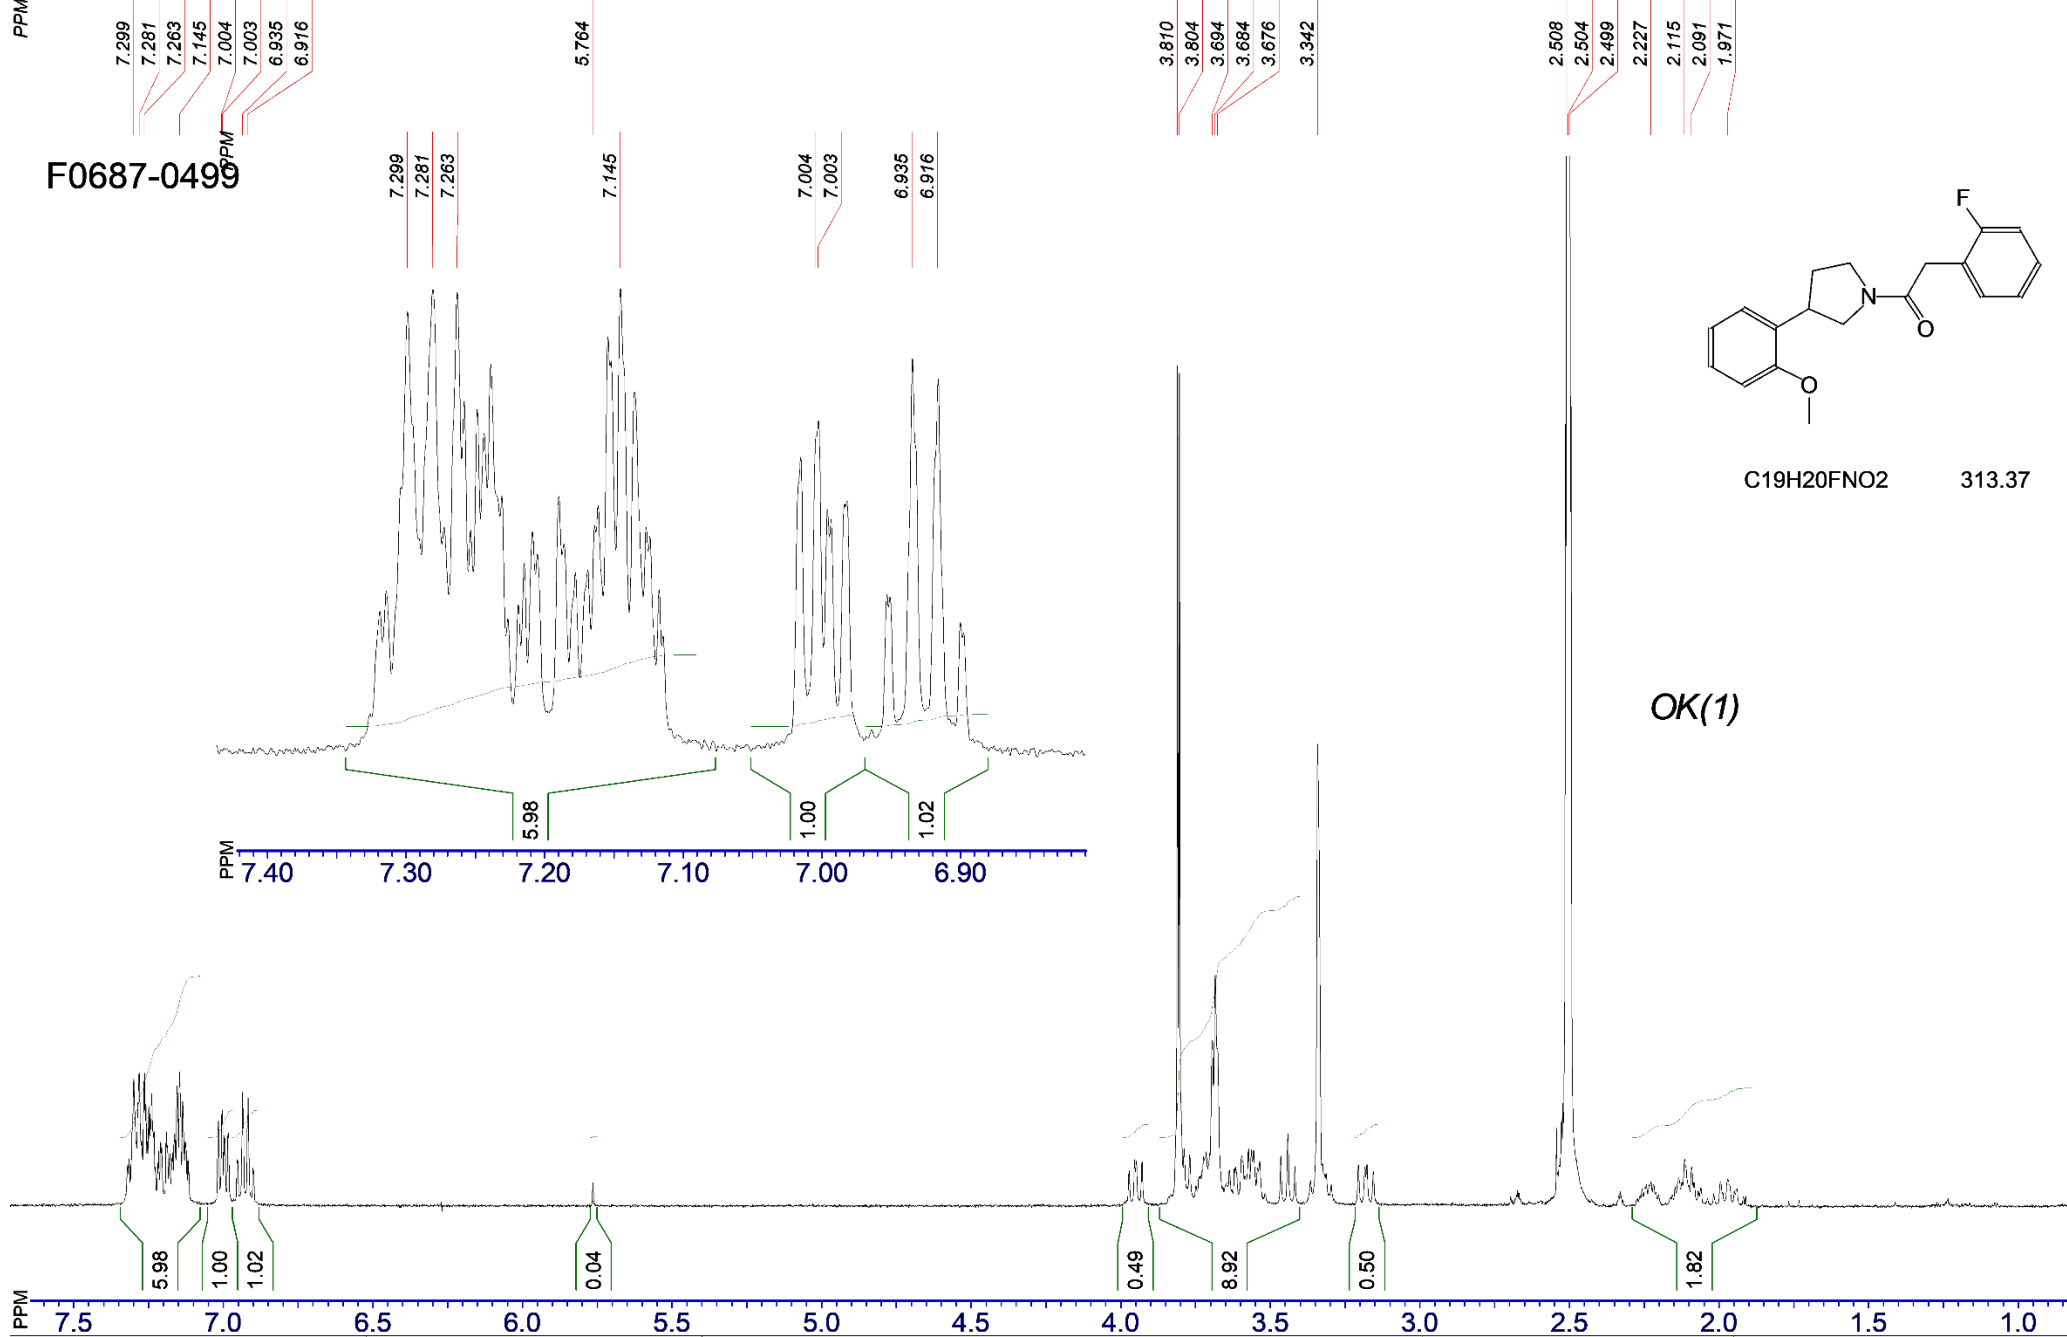

|                       |                    |                                             |                     |                      |
|-----------------------|--------------------|---------------------------------------------|---------------------|----------------------|
| File name: F0687-0499 | Expert: M.Pyanova  | SF: 400.0778 MHz; sw: 8000 Hz; at: 1.50 sec | NS: ; pw: 9,65 usec | SI: 65536, TD: 24000 |
| Date: 28_Mar_2016     | Solvent: DMSO 0321 |                                             | TE: 293 K           | block: S18745        |



- .o.- Syntez Purity Report - .o.-

Agilent 1200 LC/MSD  
Diodearray G1315B (DAD1A-215nm; DAD1B-240nm)  
Mass Quad G6140A (MSD1-Pos, MSD2-Neg)  
ELSD Altech 3300 (ADC1 A, ELSD)

Mobile Phase: A-H2O+0.1HCOOH; B-MeCN+0.1HCOOH  
Separation colu **100 %**  
Rapid Resolutionn HT Cartige 4.6x30mm,  
1.8-Micron, Zorbax SB-C18

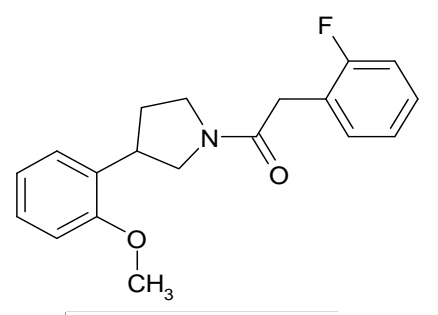

Mol.Weight: 313.37  
Salt:

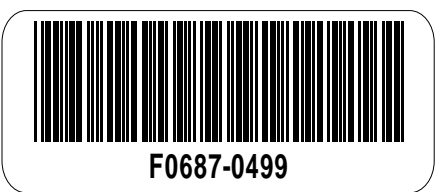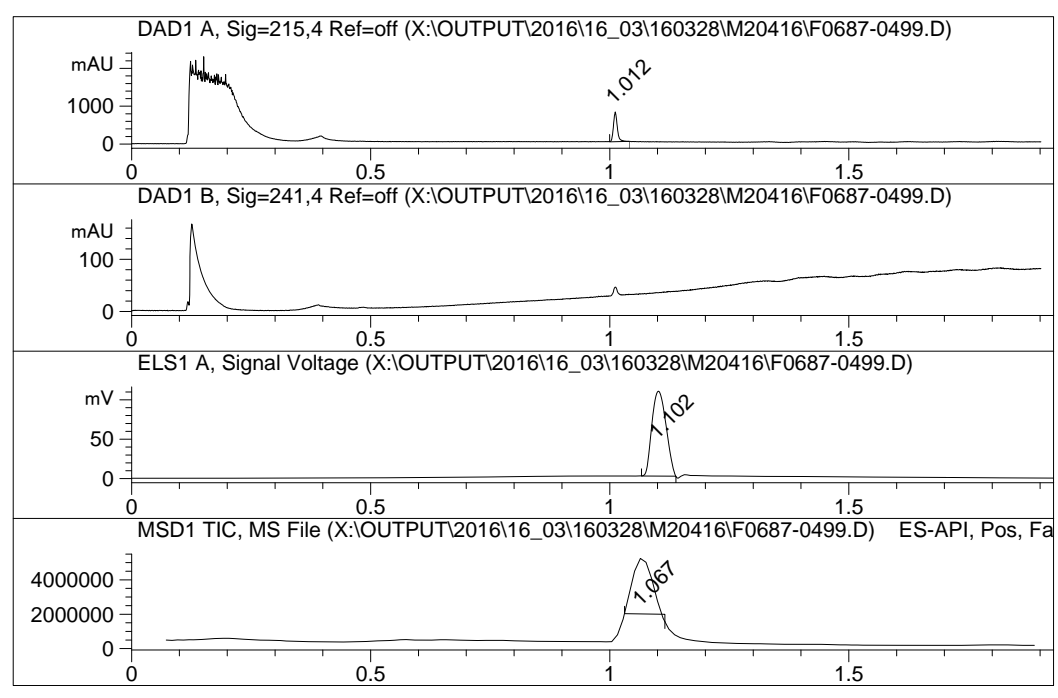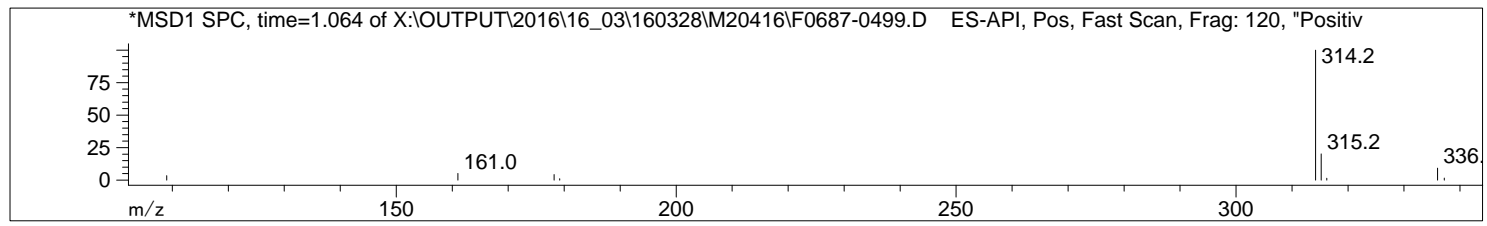

| # | Signal                    | R.Time | Area %  |
|---|---------------------------|--------|---------|
| 1 | DAD1 A, Sig=215,4 Ref=off | 1.012  | 100.000 |
| # | Signal                    | R.Time | Area %  |
| 1 | ELS1 A, Signal Voltage    | 1.102  | 100.000 |
| # | Signal                    | R.Time | Area %  |
| 1 | MSD1 TIC, MS File         | 1.067  | 100.000 |

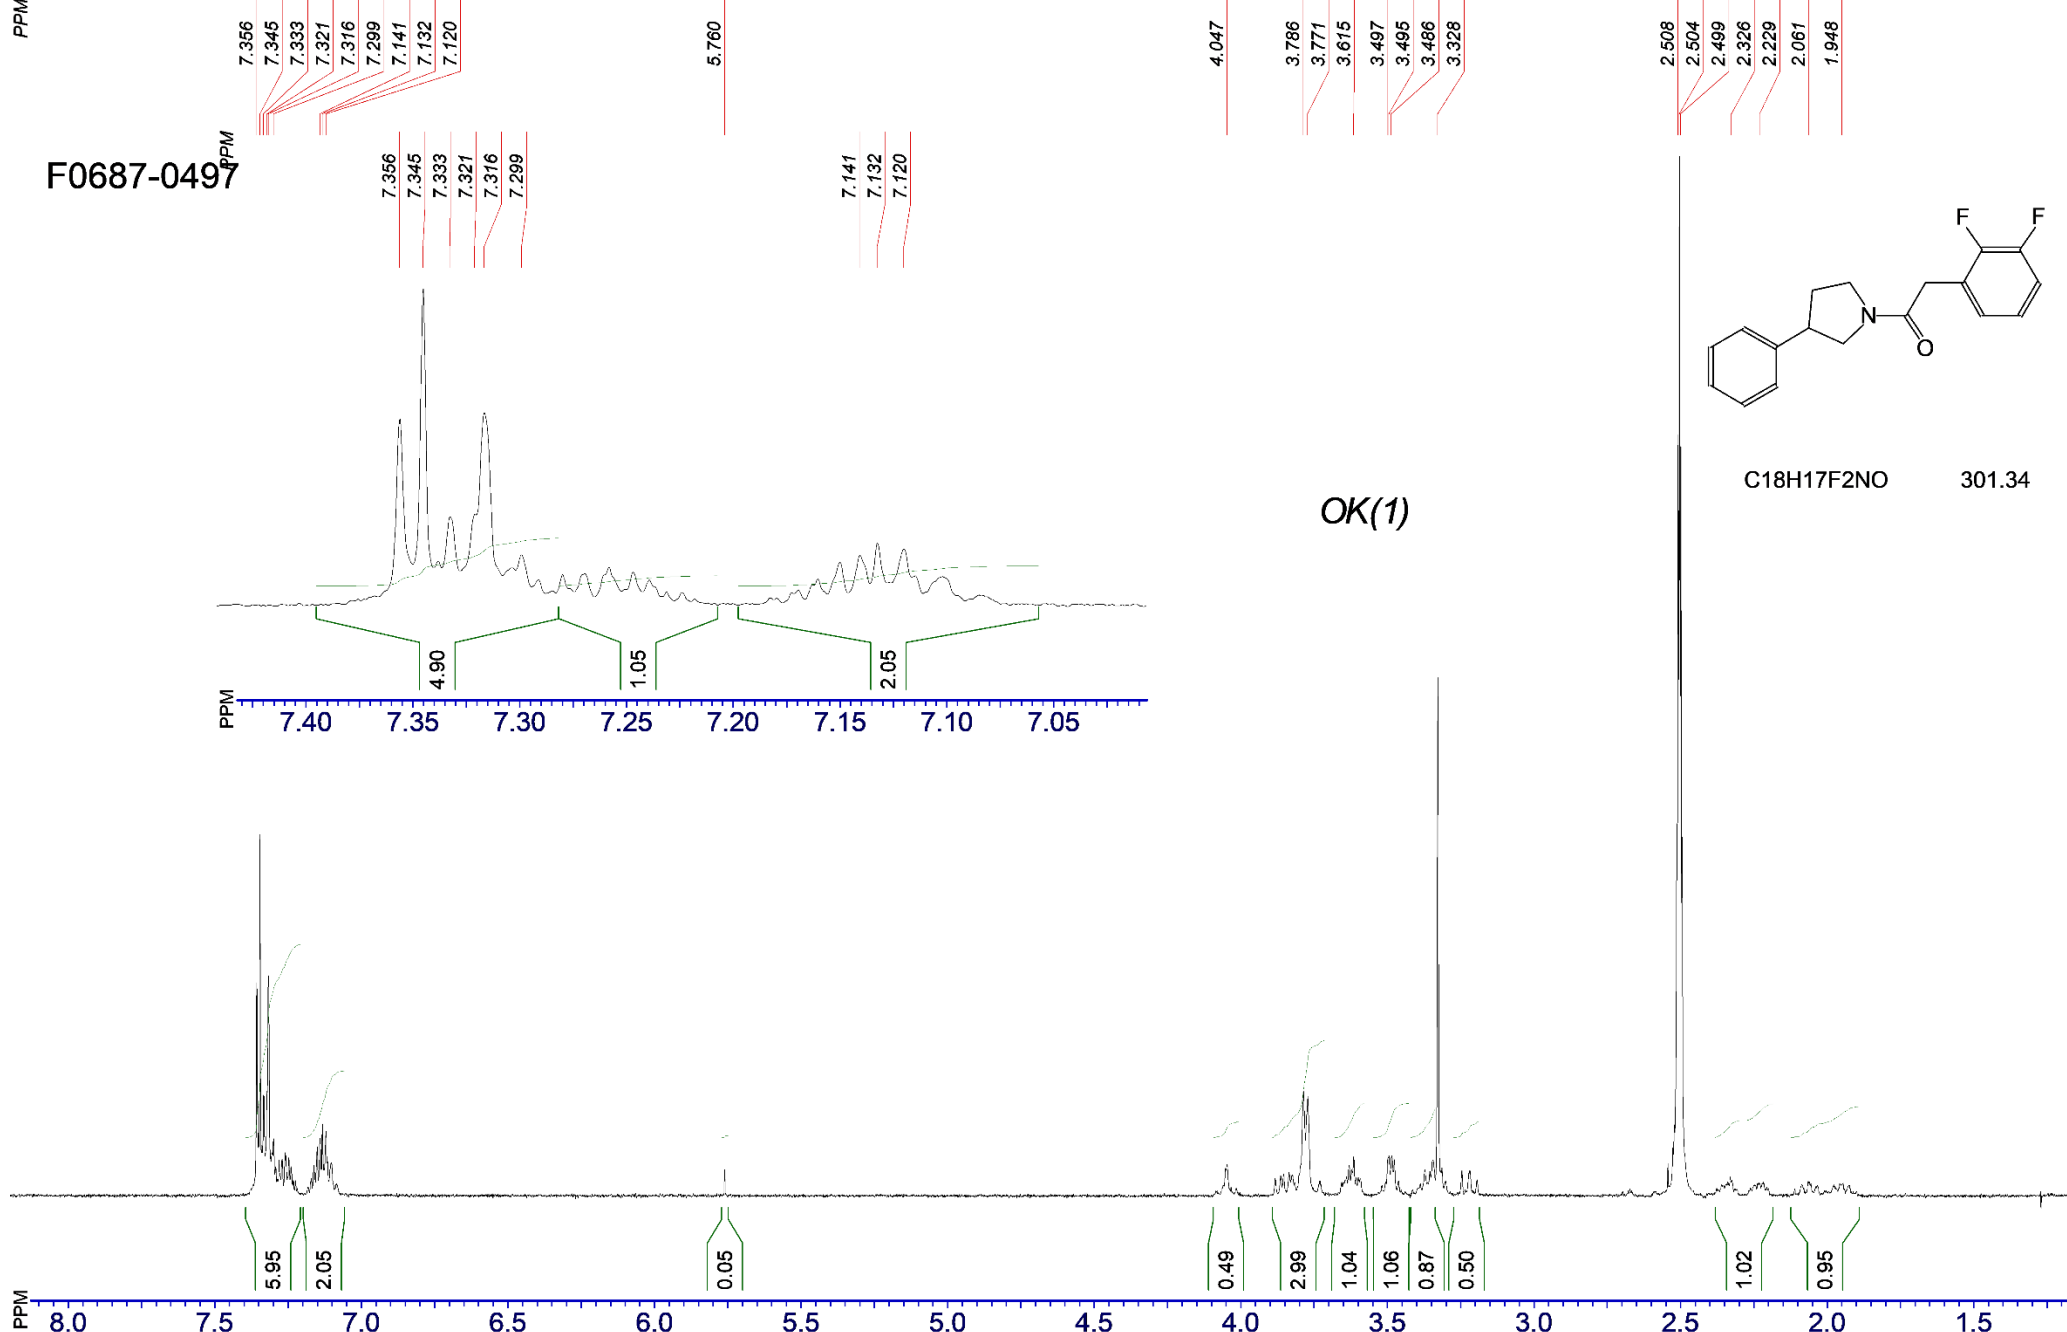

|                       |                    |                                             |                     |                      |
|-----------------------|--------------------|---------------------------------------------|---------------------|----------------------|
| File name: F0687-0497 | Expert: M.Pyanova  | SF: 400.0778 MHz; sw: 8000 Hz; at: 1.50 sec | NS: ; pw: 9,65 usec | SI: 65536, TD: 24000 |
| Date: 28_Mar_2016     | Solvent: DMSO 0321 |                                             | TE: 293 K           | block: S18745        |

-.o.-Syntez Purity Report -.o.-

Agilent 1200 LC/MSD  
 Diodearray G1315B (DAD1A-215nm; DAD1B-240nm)  
 Mass Quad G6140A (MSD1-Pos, MSD2-Neg)  
 ELSD Altech 3300 (ADC1 A, ELSD)

Mobile Phase:A-H<sub>2</sub>O+0.1HCOOH;B-MeCN+0.1HCOOH  
 Separation colour **100 %**  
 Rapid Resolution HPLC Cartidge 4.6x30mm,  
 1.8-Micron, Zorbax SB-C18

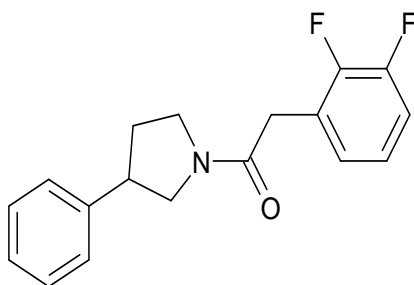

Mol.Weight: 301.33  
 Salt:

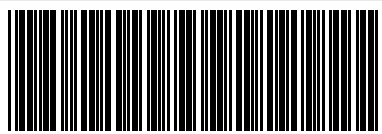

F0687-0497

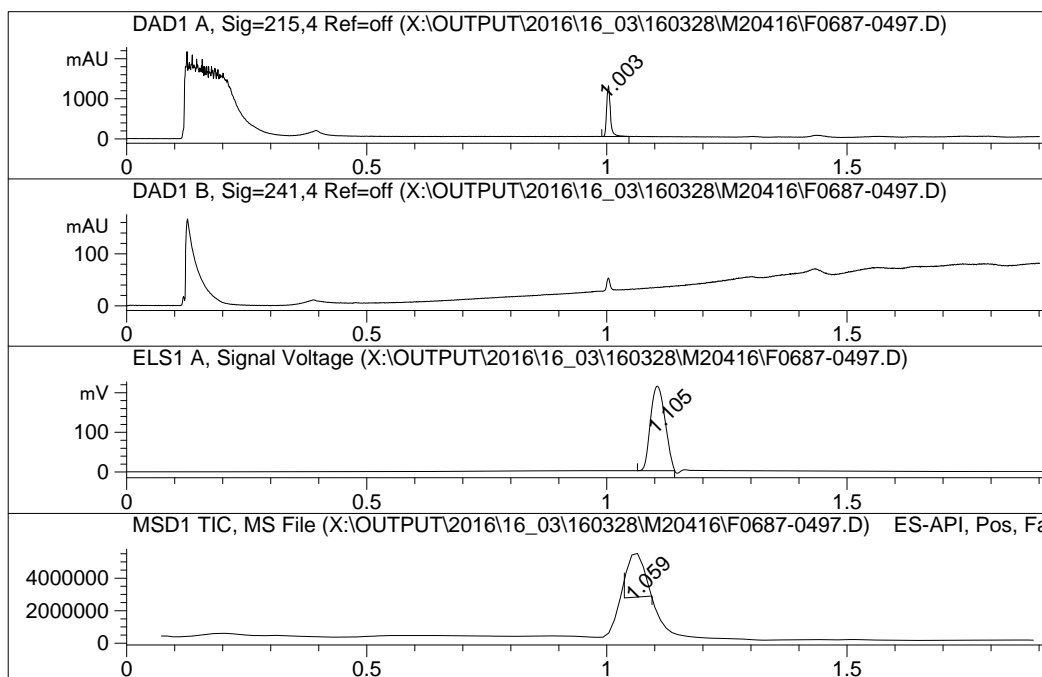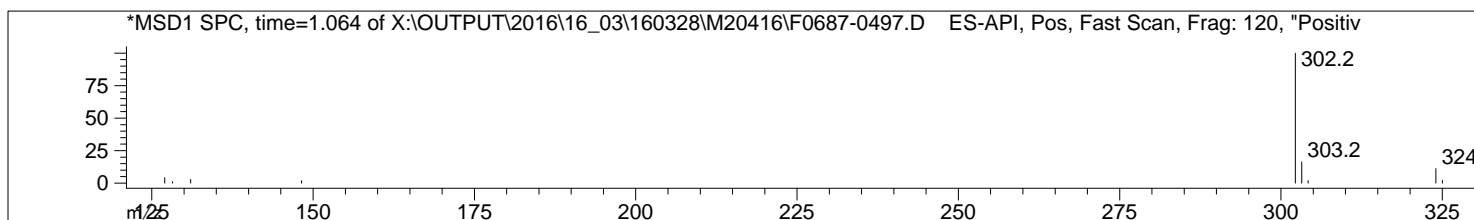

| # | Signal                    | R.Time | Area %  |
|---|---------------------------|--------|---------|
| 1 | DAD1 A, Sig=215,4 Ref=off | 1.003  | 100.000 |
| # | Signal                    | R.Time | Area %  |
| 1 | ELS1 A, Signal Voltage    | 1.105  | 100.000 |
| # | Signal                    | R.Time | Area %  |
| 1 | MSD1 TIC, MS File         | 1.059  | 100.000 |

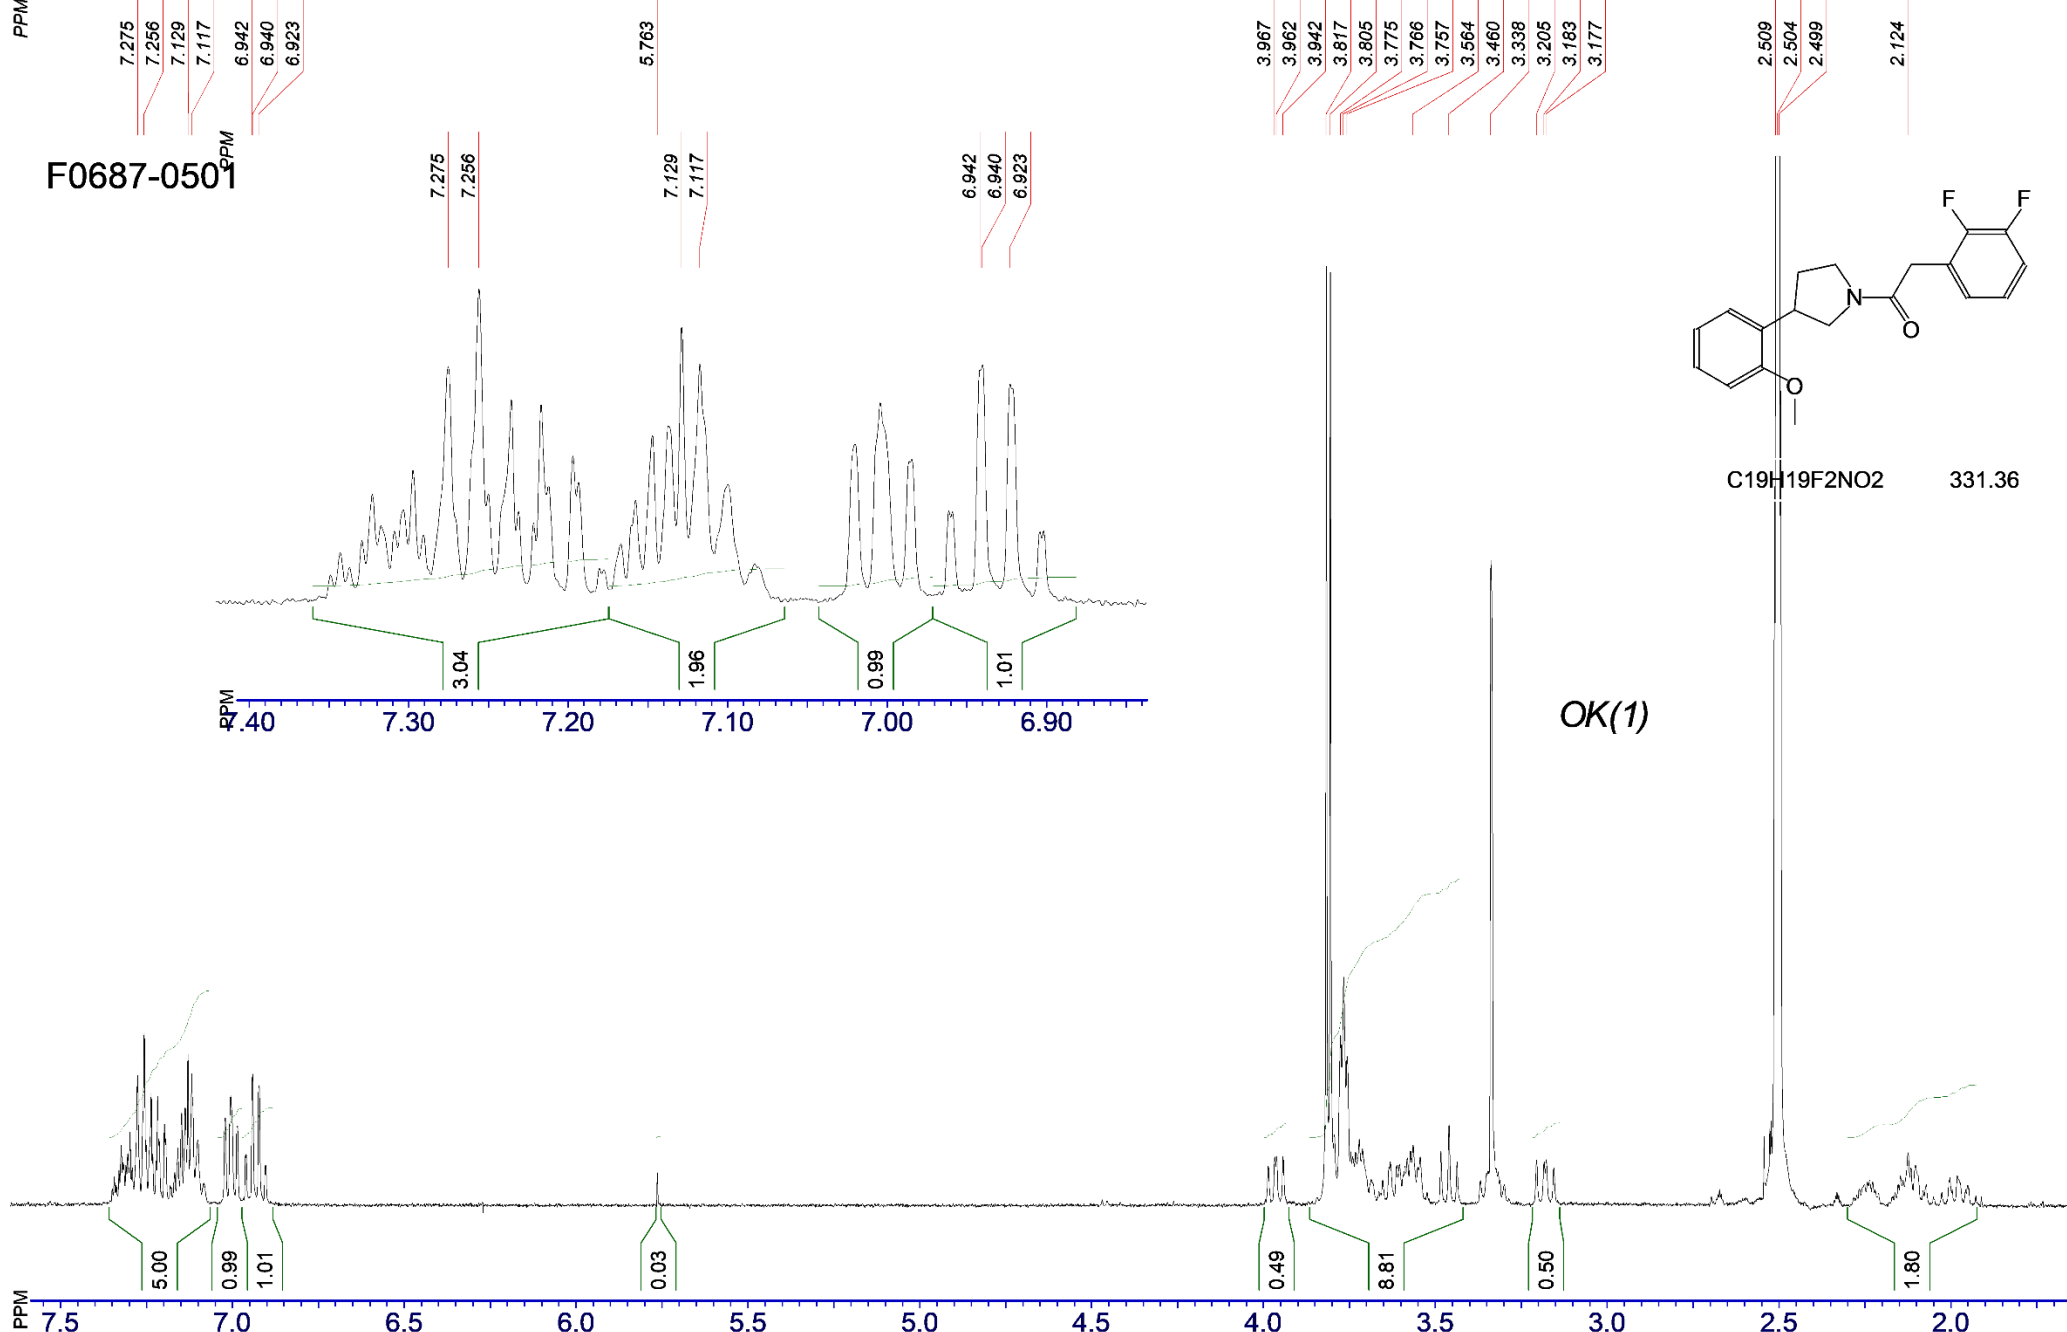

|                              |                    |                                             |                     |                      |
|------------------------------|--------------------|---------------------------------------------|---------------------|----------------------|
| File name: <b>F0687-0501</b> | Expert: M.Pyanova  | SF: 400.0778 MHz; sw: 8000 Hz; at: 1.50 sec | NS: ; pw: 9,65 usec | SI: 65536, TD: 24000 |
| Date: 28_Mar_2016            | Solvent: DMSO 0321 |                                             | TE: 293 K           | block: S18745        |

- .o.- Syntez Purity Report - .o.-

Agilent 1200 LC/MSD  
 Diodearray G1315B (DAD1A-215nm; DAD1B-240nm)  
 Mass Quad G6140A (MSD1-Pos, MSD2-Neg)  
 ELSD Altech 3300 (ADC1 A, ELSD)

Mobile Phase: A-H2O+0.1HCOOH; B-MeCN+0.1HCOOH  
 Separation colu **100%**  
 Rapid Resolutionn HT Cartige 4.6x30mm,  
 1.8-Micron, Zorbax SB-C18

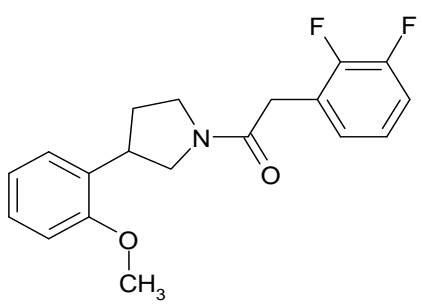

Mol.Weight: 331.36  
 Salt:

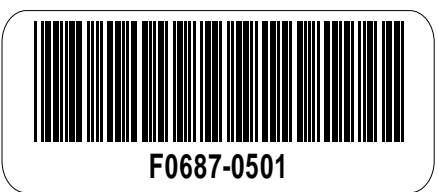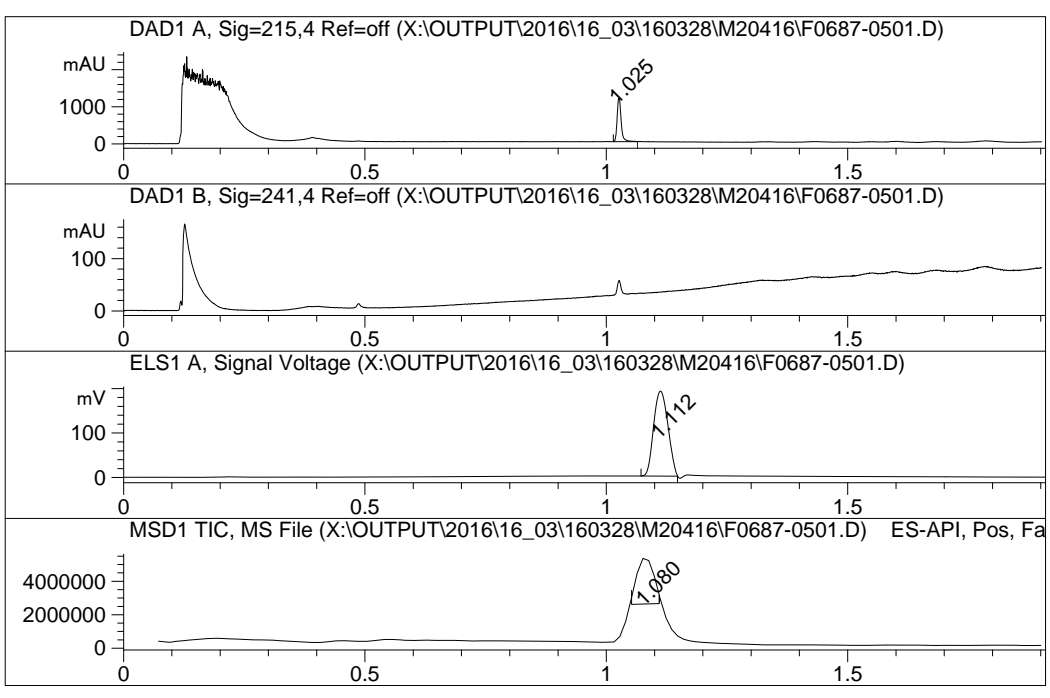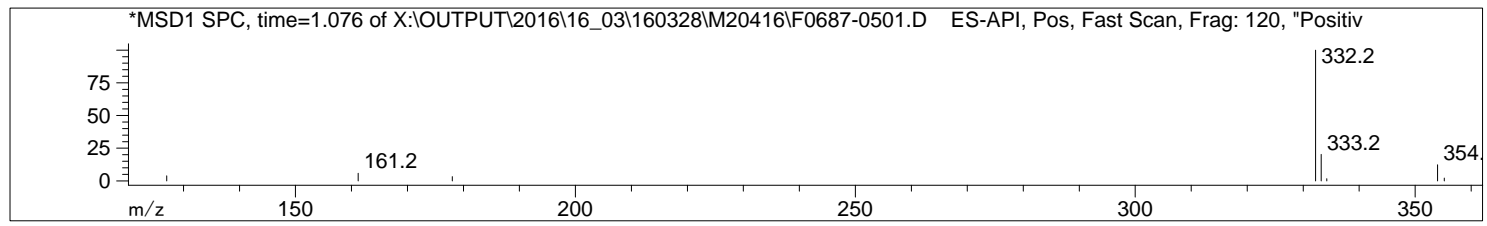

| # | Signal                    | R.Time | Area %  |
|---|---------------------------|--------|---------|
| 1 | DAD1 A, Sig=215,4 Ref=off | 1.025  | 100.000 |
| # | Signal                    | R.Time | Area %  |
| 1 | ELS1 A, Signal Voltage    | 1.112  | 100.000 |
| # | Signal                    | R.Time | Area %  |
| 1 | MSD1 TIC, MS File         | 1.080  | 100.000 |

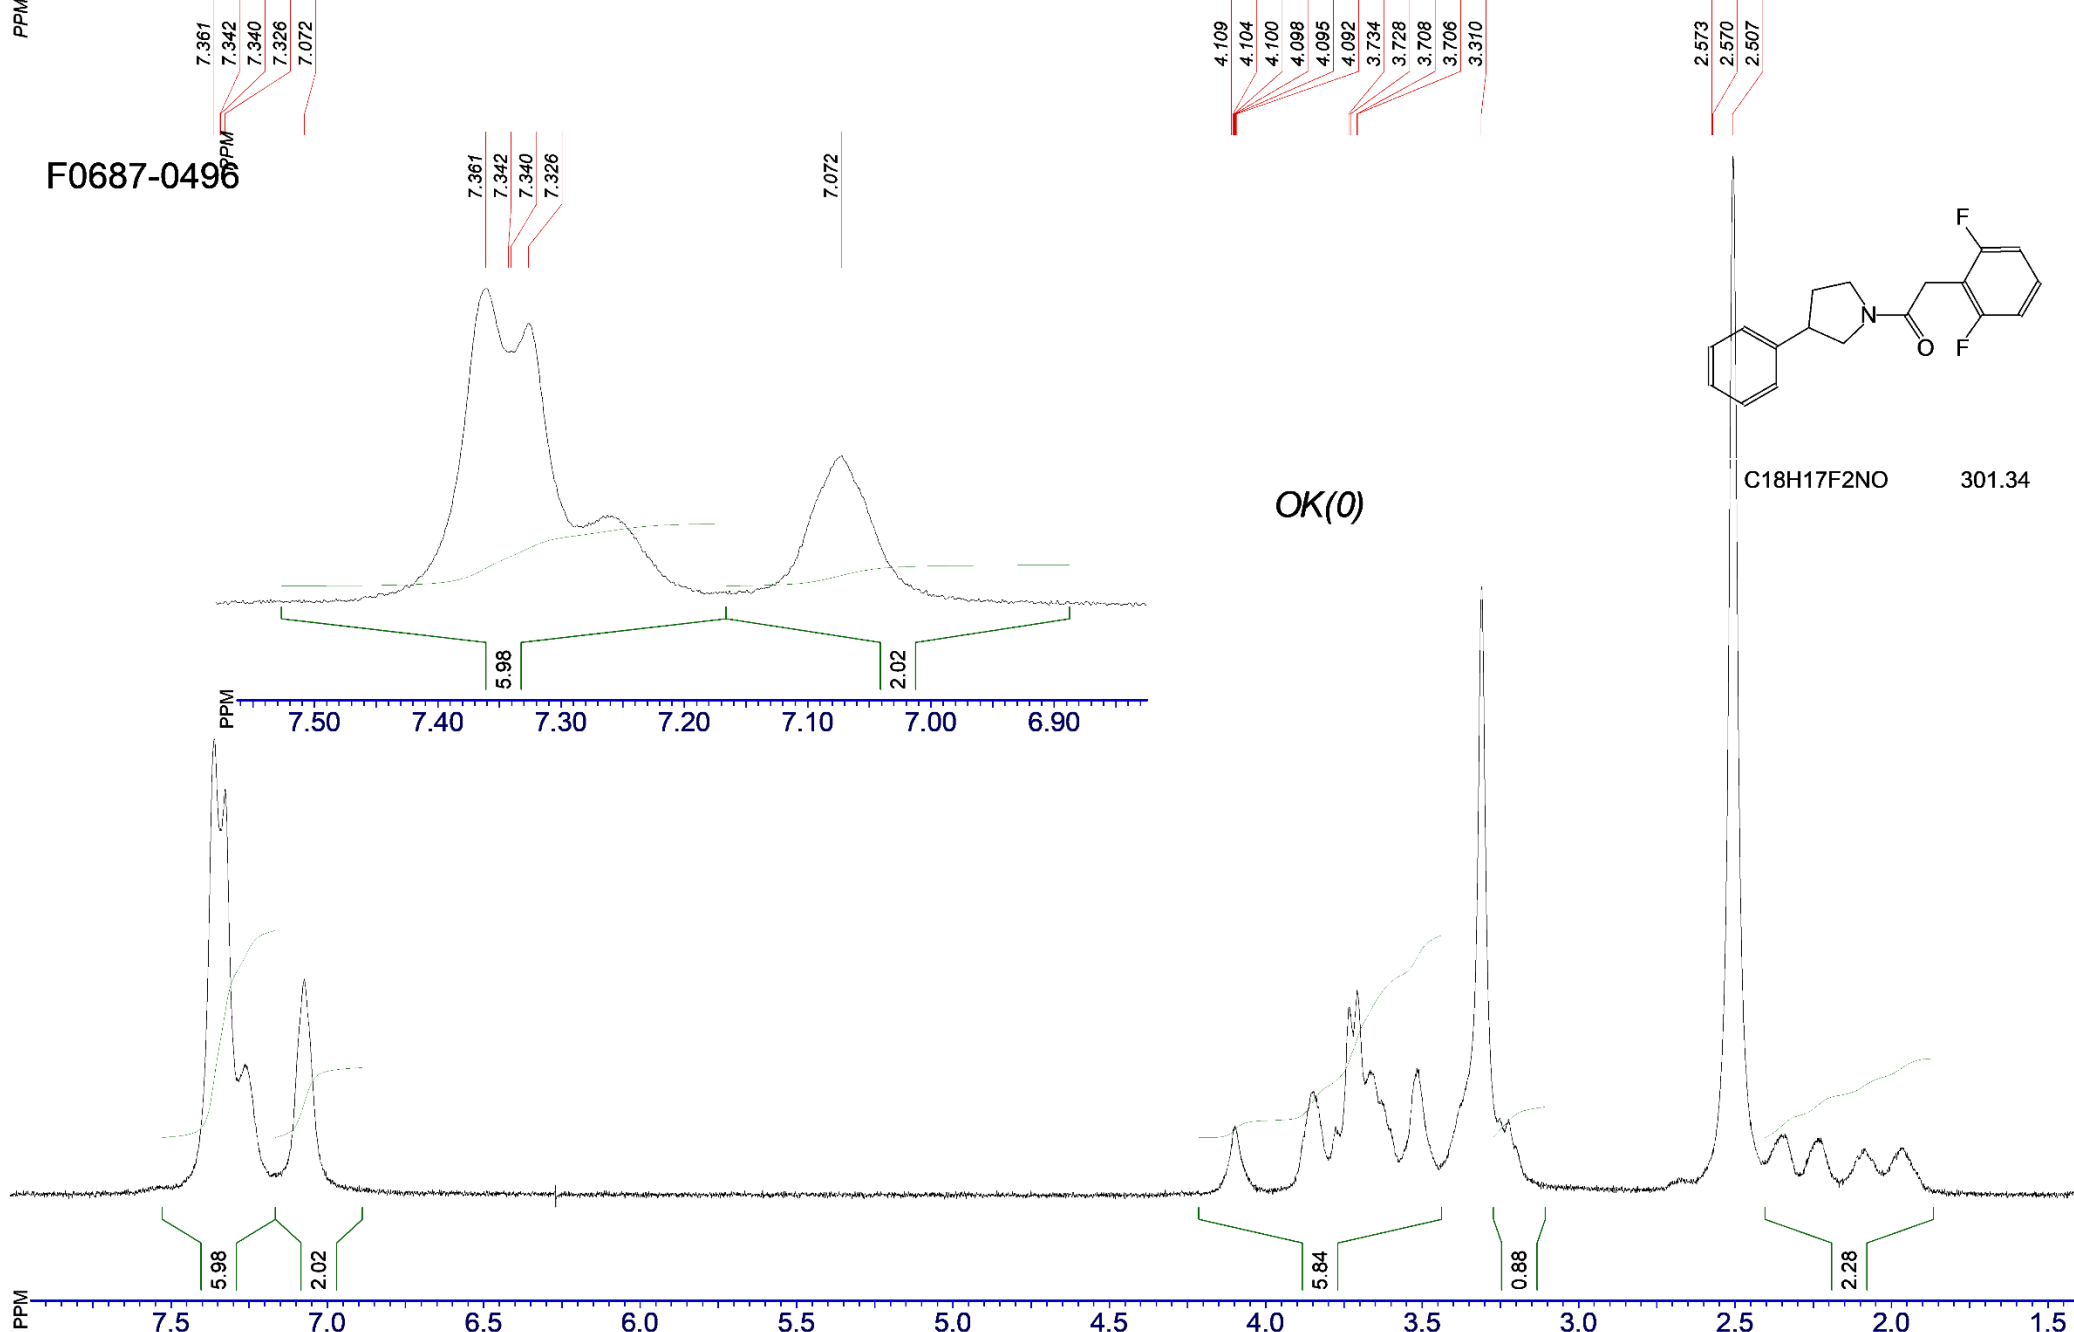

|                       |                    |                                             |                     |                      |
|-----------------------|--------------------|---------------------------------------------|---------------------|----------------------|
| File name: F0687-0496 | Expert: M.Pyanova  | SF: 400.0778 MHz; sw: 8000 Hz; at: 1.50 sec | NS: ; pw: 9,65 usec | SI: 65536, TD: 24000 |
| Date: 21_Mar_2016     | Solvent: DMSO 0315 |                                             | TE: 293 K           | block: S18648        |

## -.o.-Syntez Purity Report -.o.-

Agilent 1200 LC/MSD  
 Diodearray G1315B (DAD1A-215nm; DAD1B-240nm)  
 Mass Quad G6140A (MSD1-Pos, MSD2-Neg)  
 ELSD Altech 3300 (ADC1 A, ELSD)

Mobile Phase:A-H<sub>2</sub>O+0.1HCOOH;B-MeCN+0.1HCOOH  
 Separation colun **97%**  
 Rapid Resolutionn HT Cartige 4.6x30mm,  
 1.8-Micron, Zorbax SB-C18

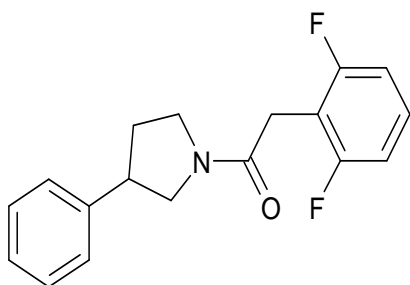

Mol.Weight: 301.33  
 Salt:

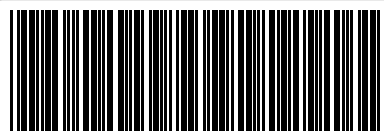

F0687-0496

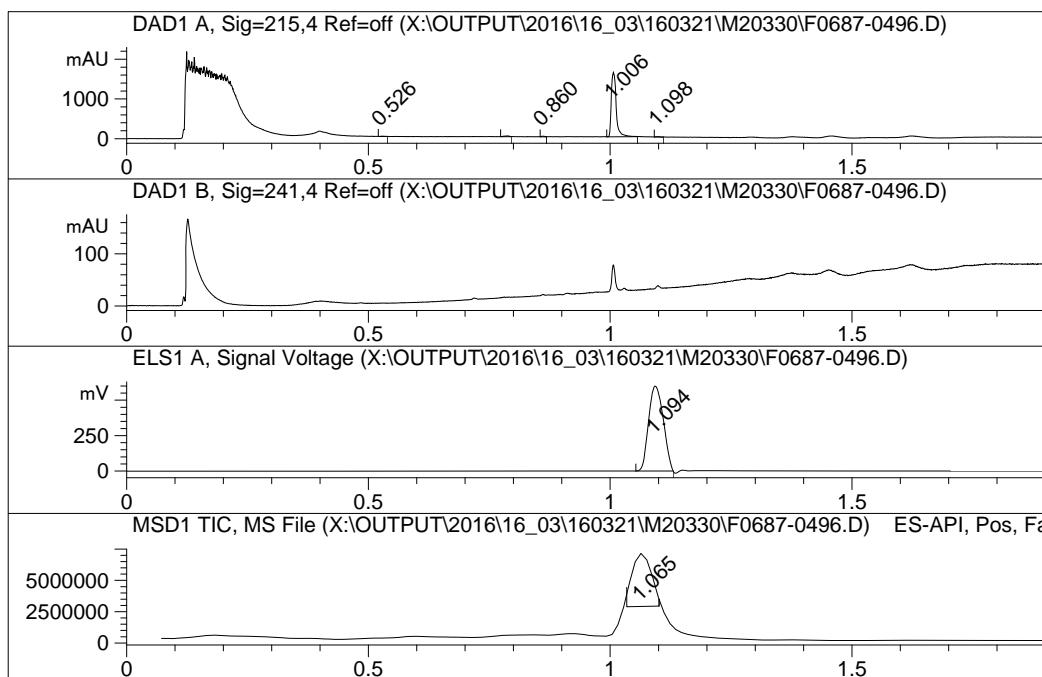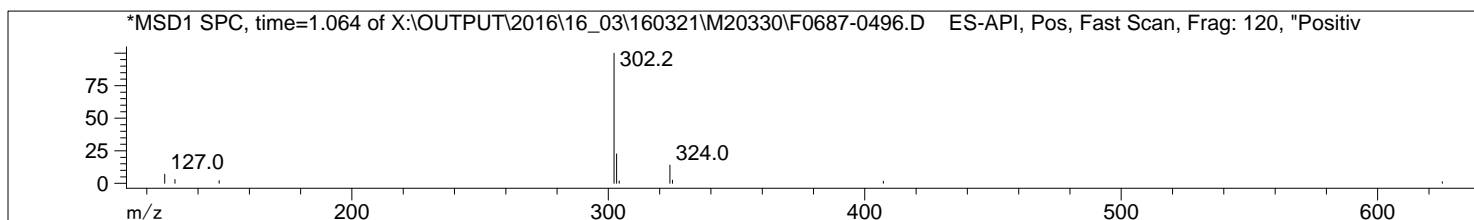

| # | Signal                    | R.Time | Area % |
|---|---------------------------|--------|--------|
| 1 | DAD1 A, Sig=215,4 Ref=off | 0.526  | 0.534  |
| 2 |                           | 0.787  | 1.249  |
| 3 |                           | 0.860  | 0.632  |
| 4 |                           | 1.006  | 97.073 |
| 5 |                           | 1.098  | 0.512  |

  

| # | Signal                 | R.Time | Area %  |
|---|------------------------|--------|---------|
| 1 | ELS1 A, Signal Voltage | 1.094  | 100.000 |

  

| # | Signal            | R.Time | Area %  |
|---|-------------------|--------|---------|
| 1 | MSD1 TIC, MS File | 1.065  | 100.000 |

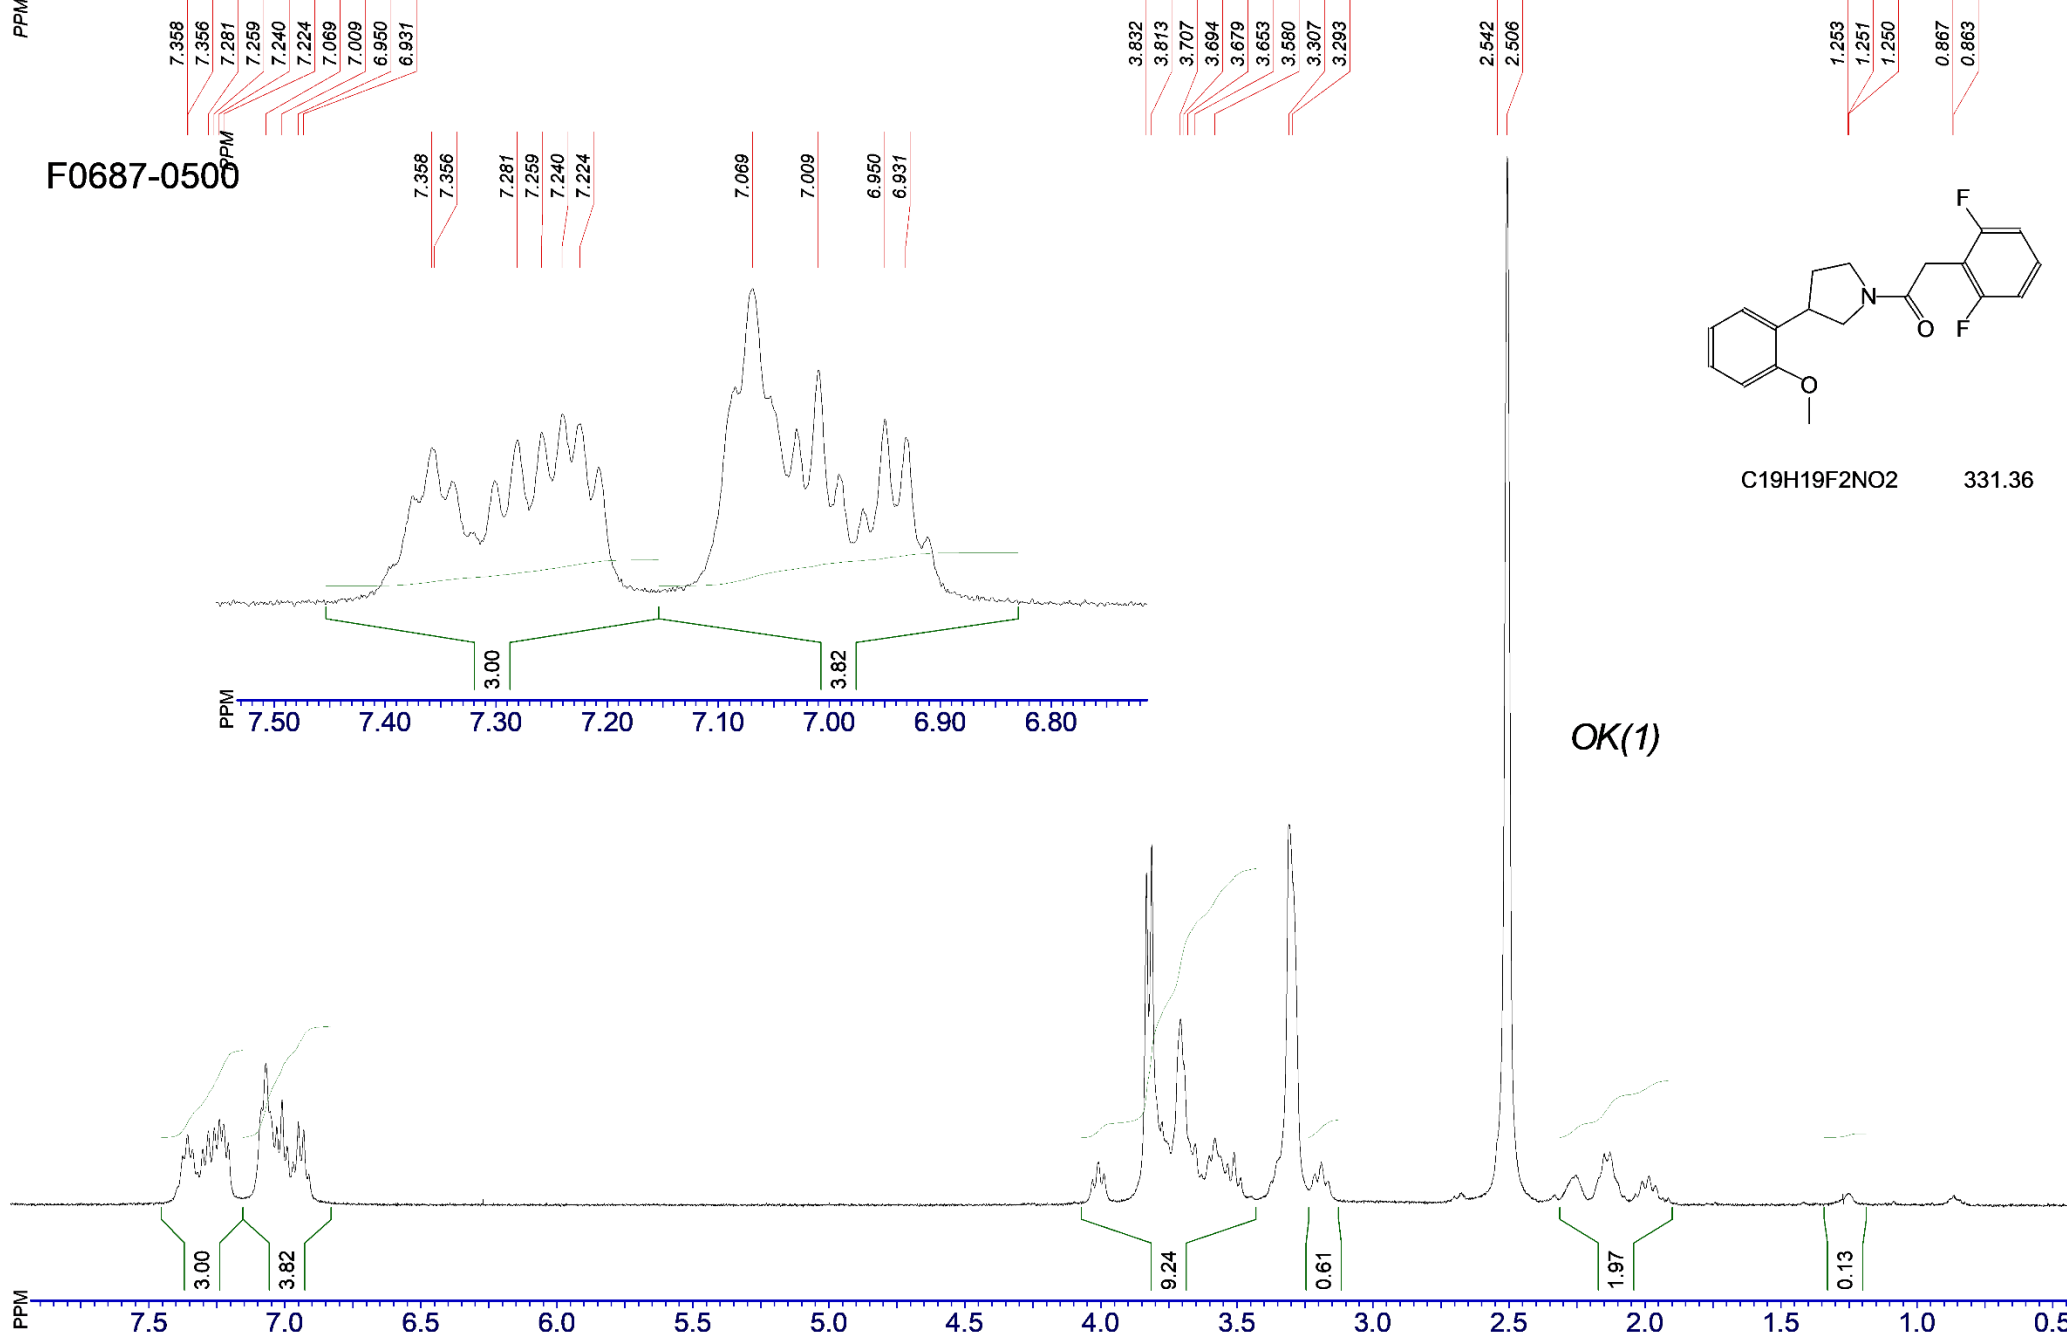

|                              |                    |                                             |                     |                      |
|------------------------------|--------------------|---------------------------------------------|---------------------|----------------------|
| File name: <b>F0687-0500</b> | Expert: M.Pyanova  | SF: 400.0778 MHz; sw: 8000 Hz; at: 1.50 sec | NS: ; pw: 9,65 usec | SI: 65536, TD: 24000 |
| Date: 22_Mar_2016            | Solvent: DMSO 0315 |                                             | TE: 293 K           | block: S18666        |



-.o.-Syntez Purity Report -.o.-

Agilent 1100 LC/MSD SL  
 Diodearray G1315B (DAD1A-215nm; DAD1B-254nm)  
 Mass Quad G1956B (MSD1-Pos, MSD2-Neg)  
 ELSD Altech 3300 (ADC1 A, ELSD)

Mobile Phase:A-H<sub>2</sub>O+0.1%HCOOH;B-MeCN+0.1HCOOH  
 Separation column: **96 %**  
 Rapid Resolutionn HT Cartridge 4.6x30mm,  
 1.8-Micron, Zorbax SB C-18

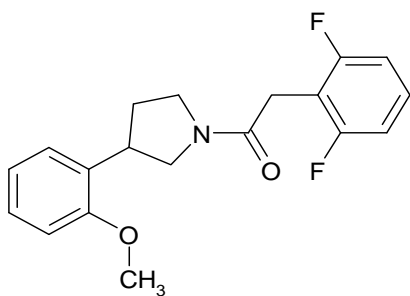

Mol.Weight: 331.36  
 Salt:

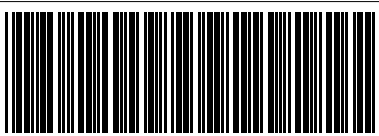

F0687-0500

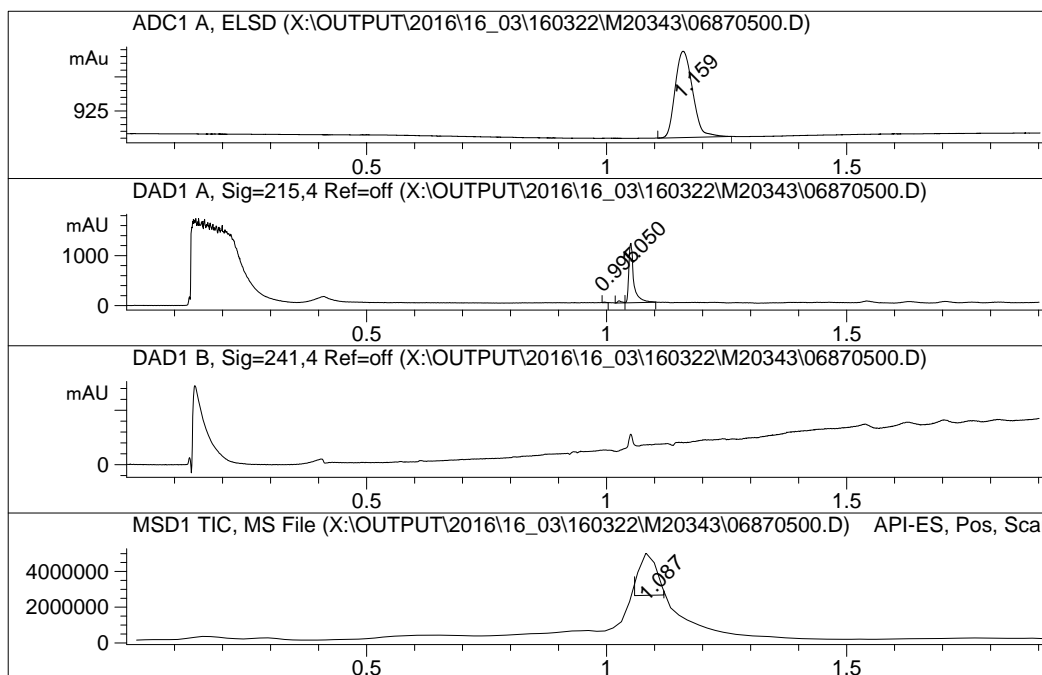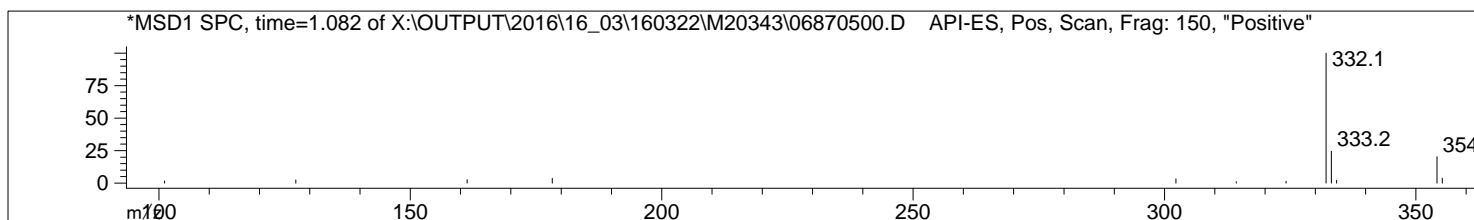

| # | Signal                    | R.Time | Area %  |
|---|---------------------------|--------|---------|
| 1 | ADC1 A, ELSD              | 1.159  | 100.000 |
| # | Signal                    | R.Time | Area %  |
| 1 | DAD1 A, Sig=215,4 Ref=off | 0.995  | 0.528   |
| 2 |                           | 1.025  | 2.825   |
| 3 |                           | 1.050  | 96.646  |
| # | Signal                    | R.Time | Area %  |
| # | Signal                    | R.Time | Area %  |
| 1 | MSD1 TIC, MS File         | 1.087  | 100.000 |

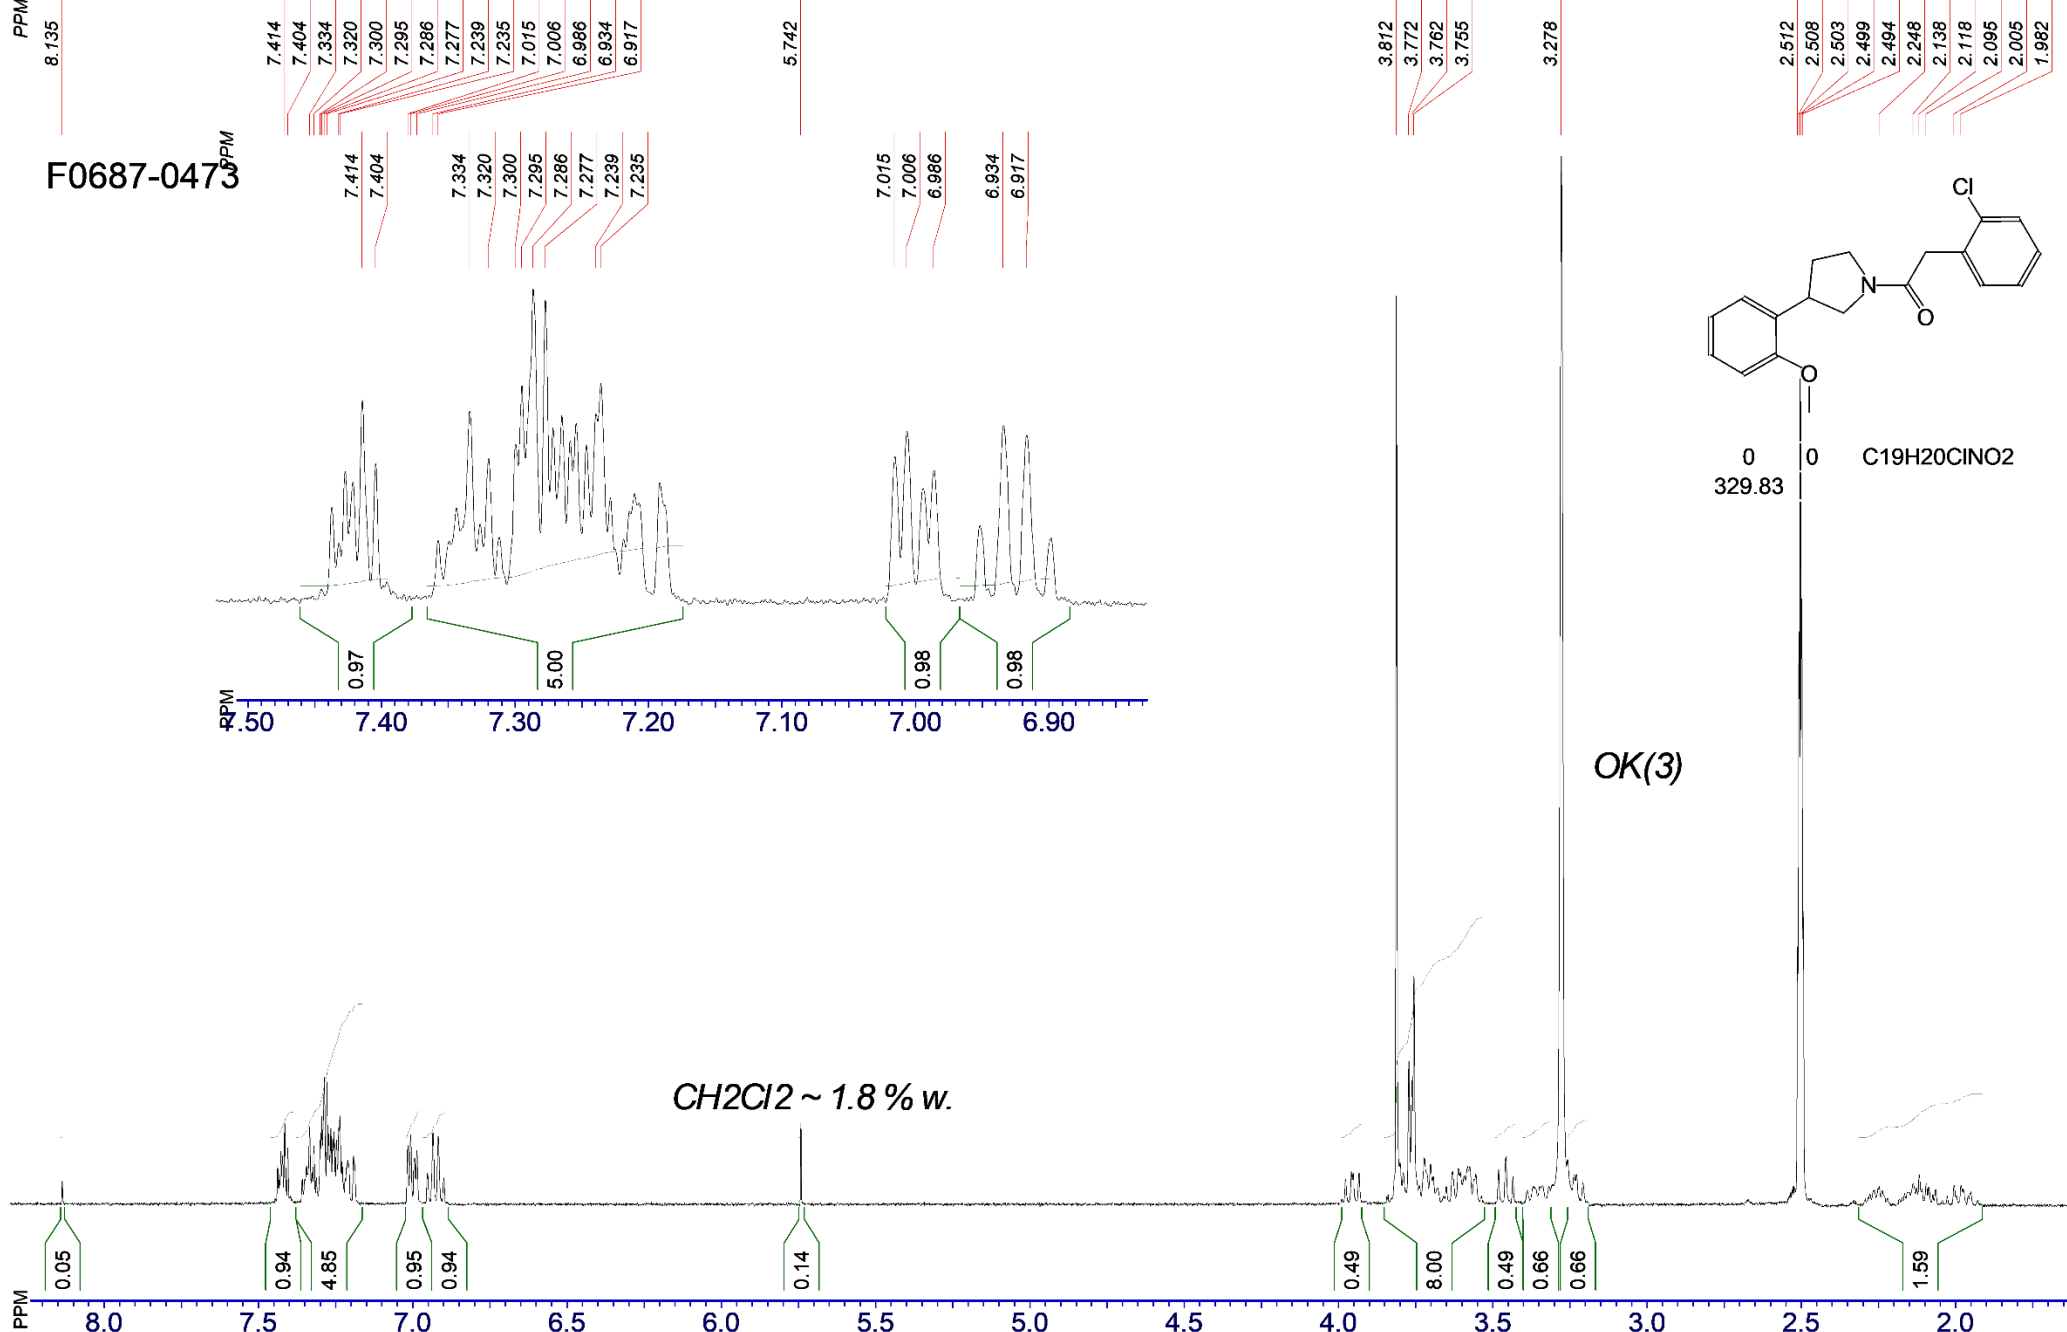

|                       |                   |                                             |                     |                      |
|-----------------------|-------------------|---------------------------------------------|---------------------|----------------------|
| File name: F0687-0473 | Expert: M.Pyanova | SF: 400.0778 MHz; sw: 8000 Hz; at: 1.50 sec | NS: ; pw: 9,65 usec | SI: 65536, TD: 24000 |
| Date: 26_Oct_2015     | Solvent: DMSO new |                                             | TE: 293 K           | block: S17133        |

- .o. - Syntez Purity Report - .o. -

Agilent 1200 LC/MSD  
 Diodearray G1315B (DAD1A-215nm; DAD1B-240nm)  
 Mass Quad G6140A (MSD1-Pos, MSD2-Neg)  
 ELSD Altech 3300 (ADC1 A, ELSD)

Mobile Phase: A-H<sub>2</sub>O+0.1HCOOH; B-MeCN+0.1HCOOH  
 Separation colu **99%**  
 Rapid Resolutionn HT Cartige 4.6x30mm,  
 1.8-Micron, Zorbax SB-C18

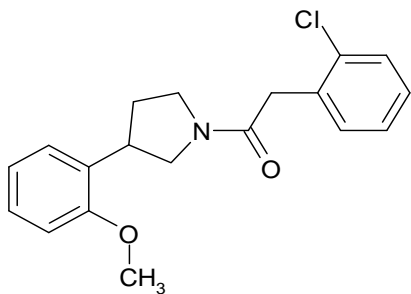

Mol.Weight: 329.83  
 Salt:

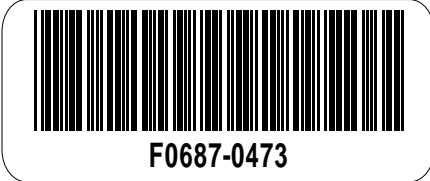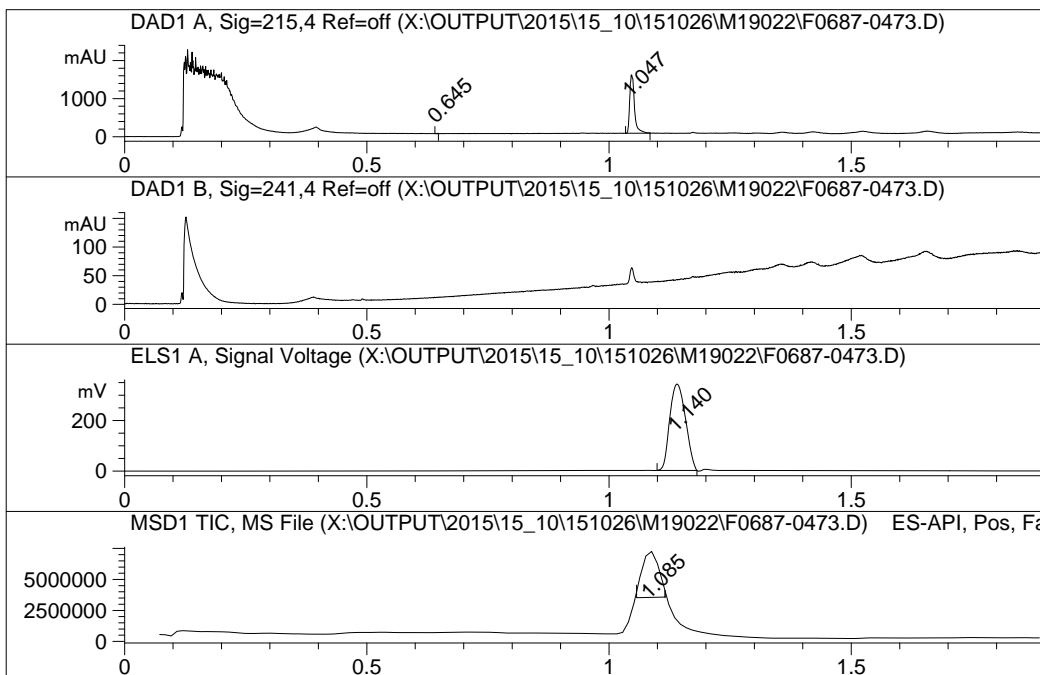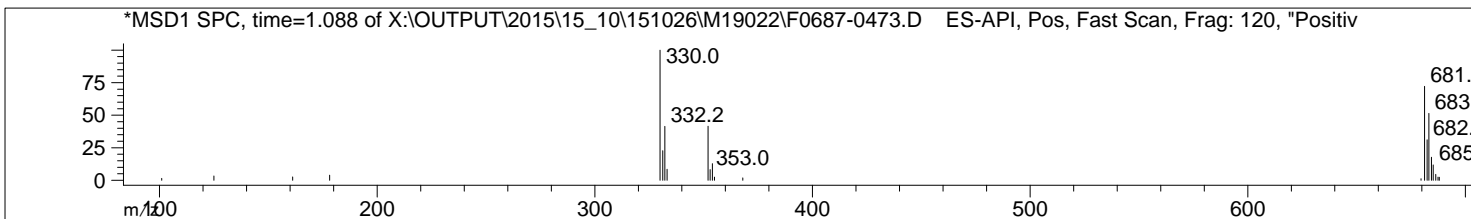

| # | Signal                    | R.Time | Area % |
|---|---------------------------|--------|--------|
| 1 | DAD1 A, Sig=215,4 Ref=off | 0.645  | 0.306  |
| 2 |                           | 1.047  | 99.694 |

  

| # | Signal                 | R.Time | Area %  |
|---|------------------------|--------|---------|
| 1 | ELS1 A, Signal Voltage | 1.140  | 100.000 |

  

| # | Signal            | R.Time | Area %  |
|---|-------------------|--------|---------|
| 1 | MSD1 TIC, MS File | 1.085  | 100.000 |

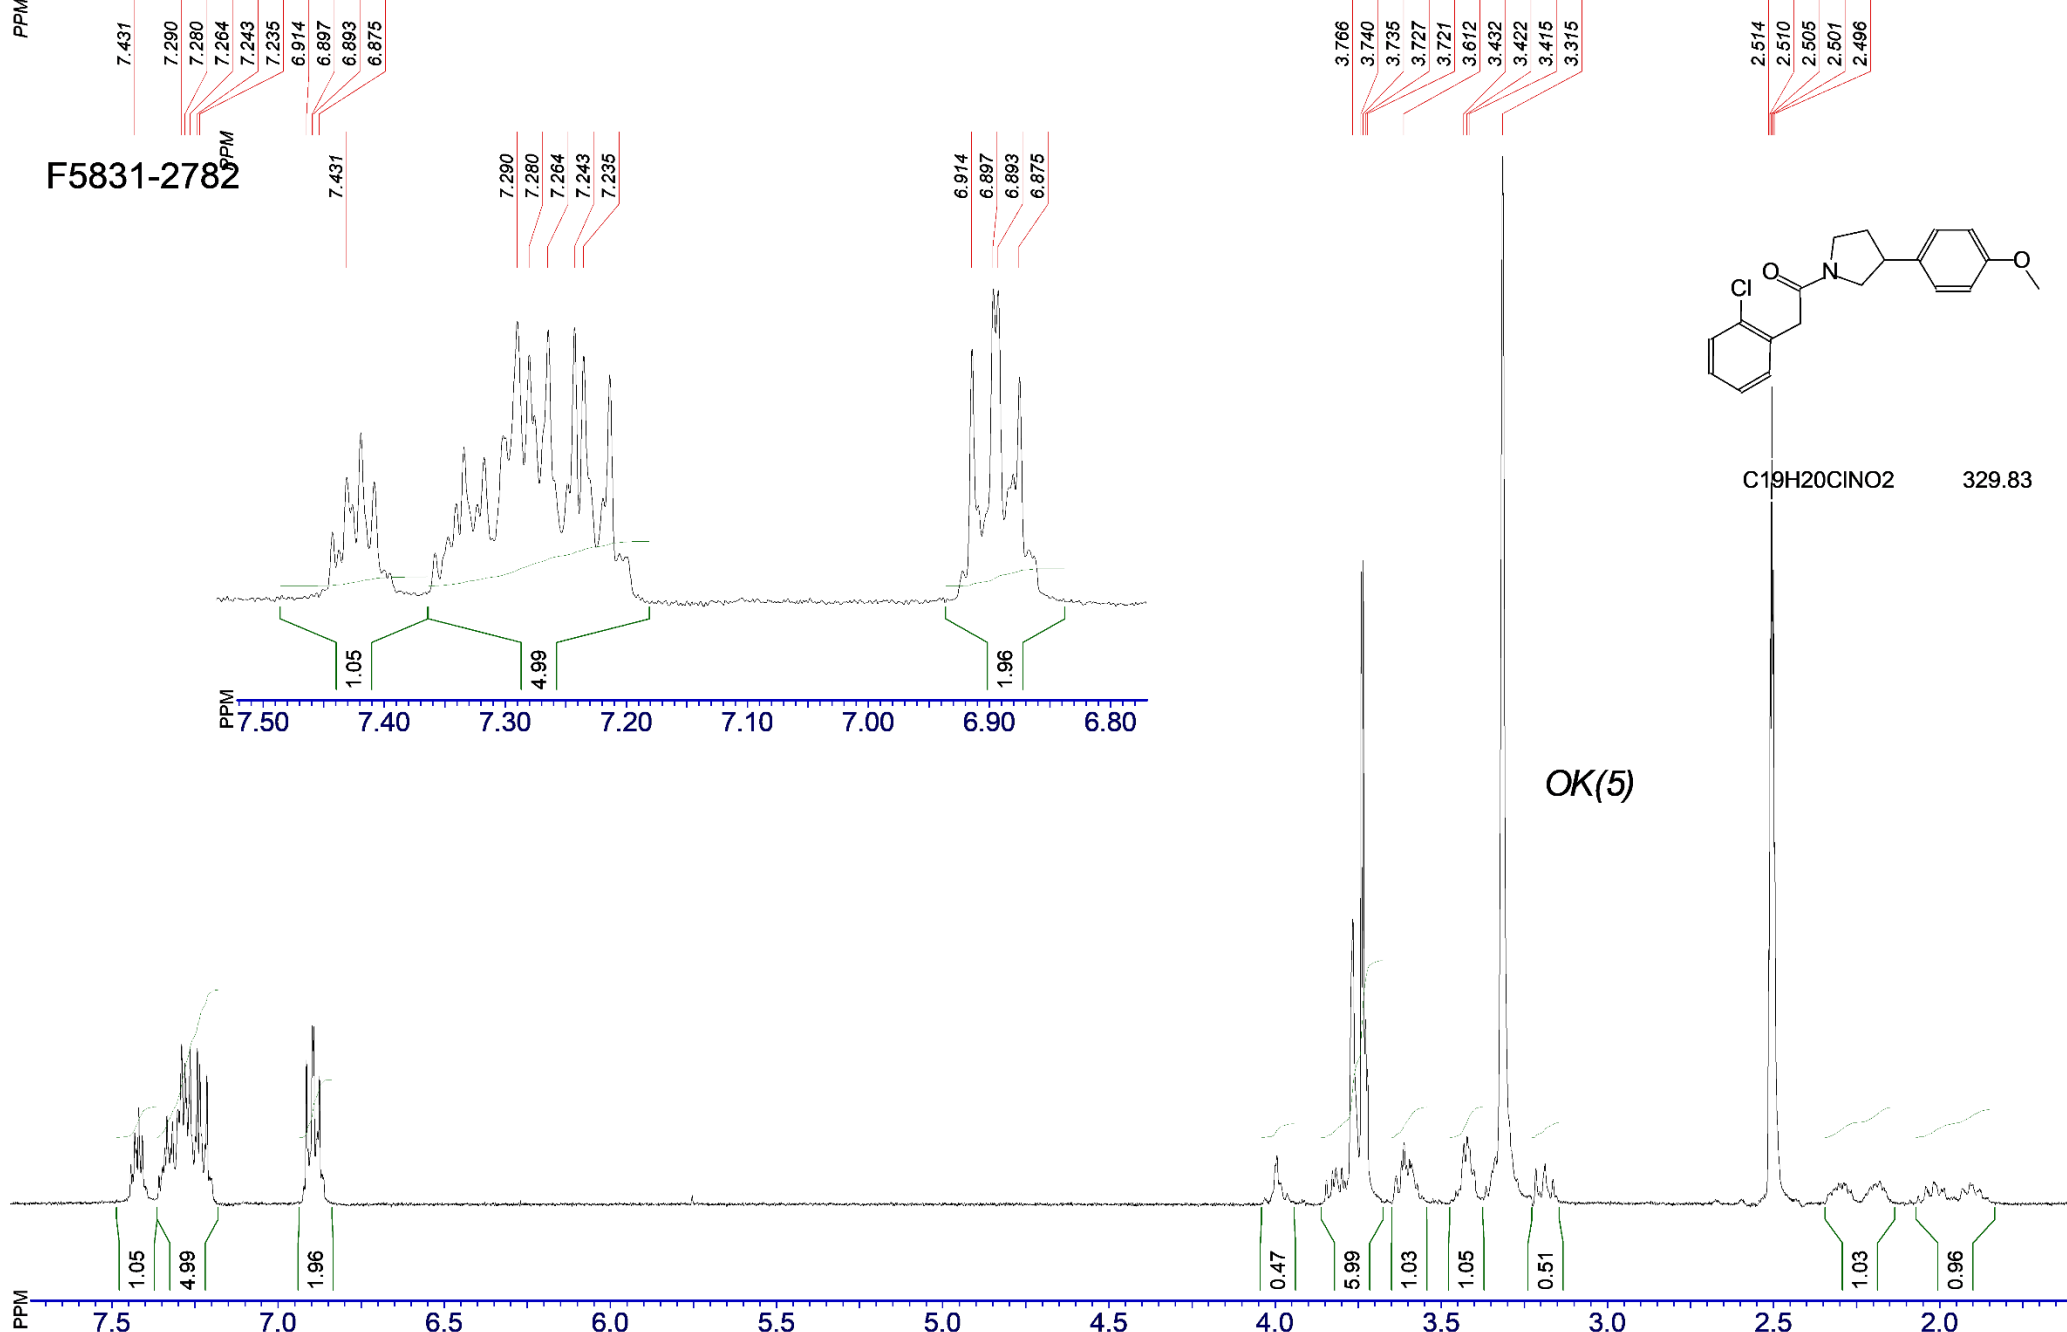

|                       |                   |                                             |                     |                      |
|-----------------------|-------------------|---------------------------------------------|---------------------|----------------------|
| File name: F5831-2782 | Expert: M.Pyanova | SF: 400.0778 MHz; sw: 8000 Hz; at: 1.50 sec | NS: ; pw: 9,65 usec | SI: 65536, TD: 24000 |
| Date: 11_Dec_2015     | Solvent: DMSO new |                                             | TE: 293 K           | block: S17623        |

-.o.-Syntez Purity Report -.o.-

Agilent 1100 LC/MSD SL  
 Diodearray G1315B (DAD1A-215nm; DAD1B-254nm)  
 Mass Quad G1956B (MSD1-Pos, MSD2-Neg)  
 ELSD Altech 3300 (ADC1 A, ELSD)

Mobile Phase:A-H<sub>2</sub>O+0.1%HCOOH;B-MeCN+0.1HCOOH  
 Separation column  
 Rapid Resolutionn HPLC Cartridge 4.6x30mm,  
 1.8-Micron, Zorbax SB C-18

99%

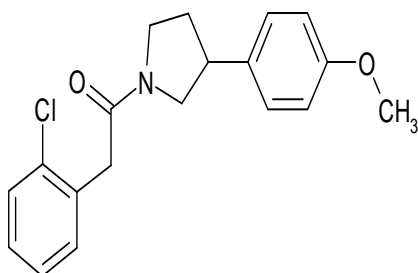

Mol.Weight: 329.83  
 Salt:

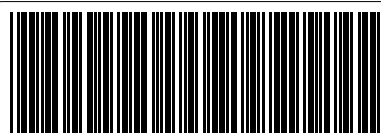

F5831-2782

M19467

-&gt;

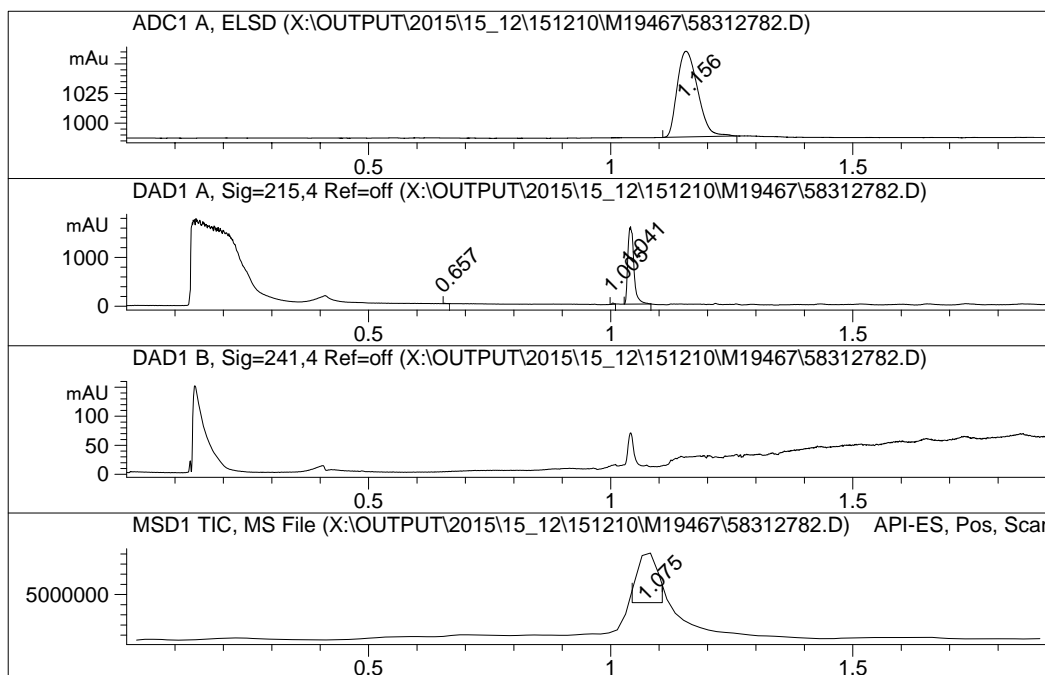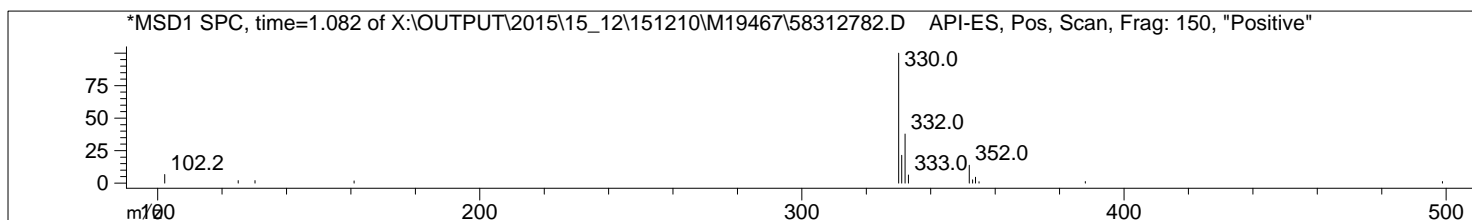

| # | Signal                    | R.Time | Area %  |
|---|---------------------------|--------|---------|
| 1 | ADC1 A, ELSD              | 1.156  | 100.000 |
| # | Signal                    | R.Time | Area %  |
| 1 | DAD1 A, Sig=215,4 Ref=off | 0.657  | 0.234   |
| 2 |                           | 1.005  | 0.598   |
| 3 |                           | 1.041  | 99.168  |
| # | Signal                    | R.Time | Area %  |
| # | Signal                    | R.Time | Area %  |
| 1 | MSD1 TIC, MS File         | 1.075  | 100.000 |

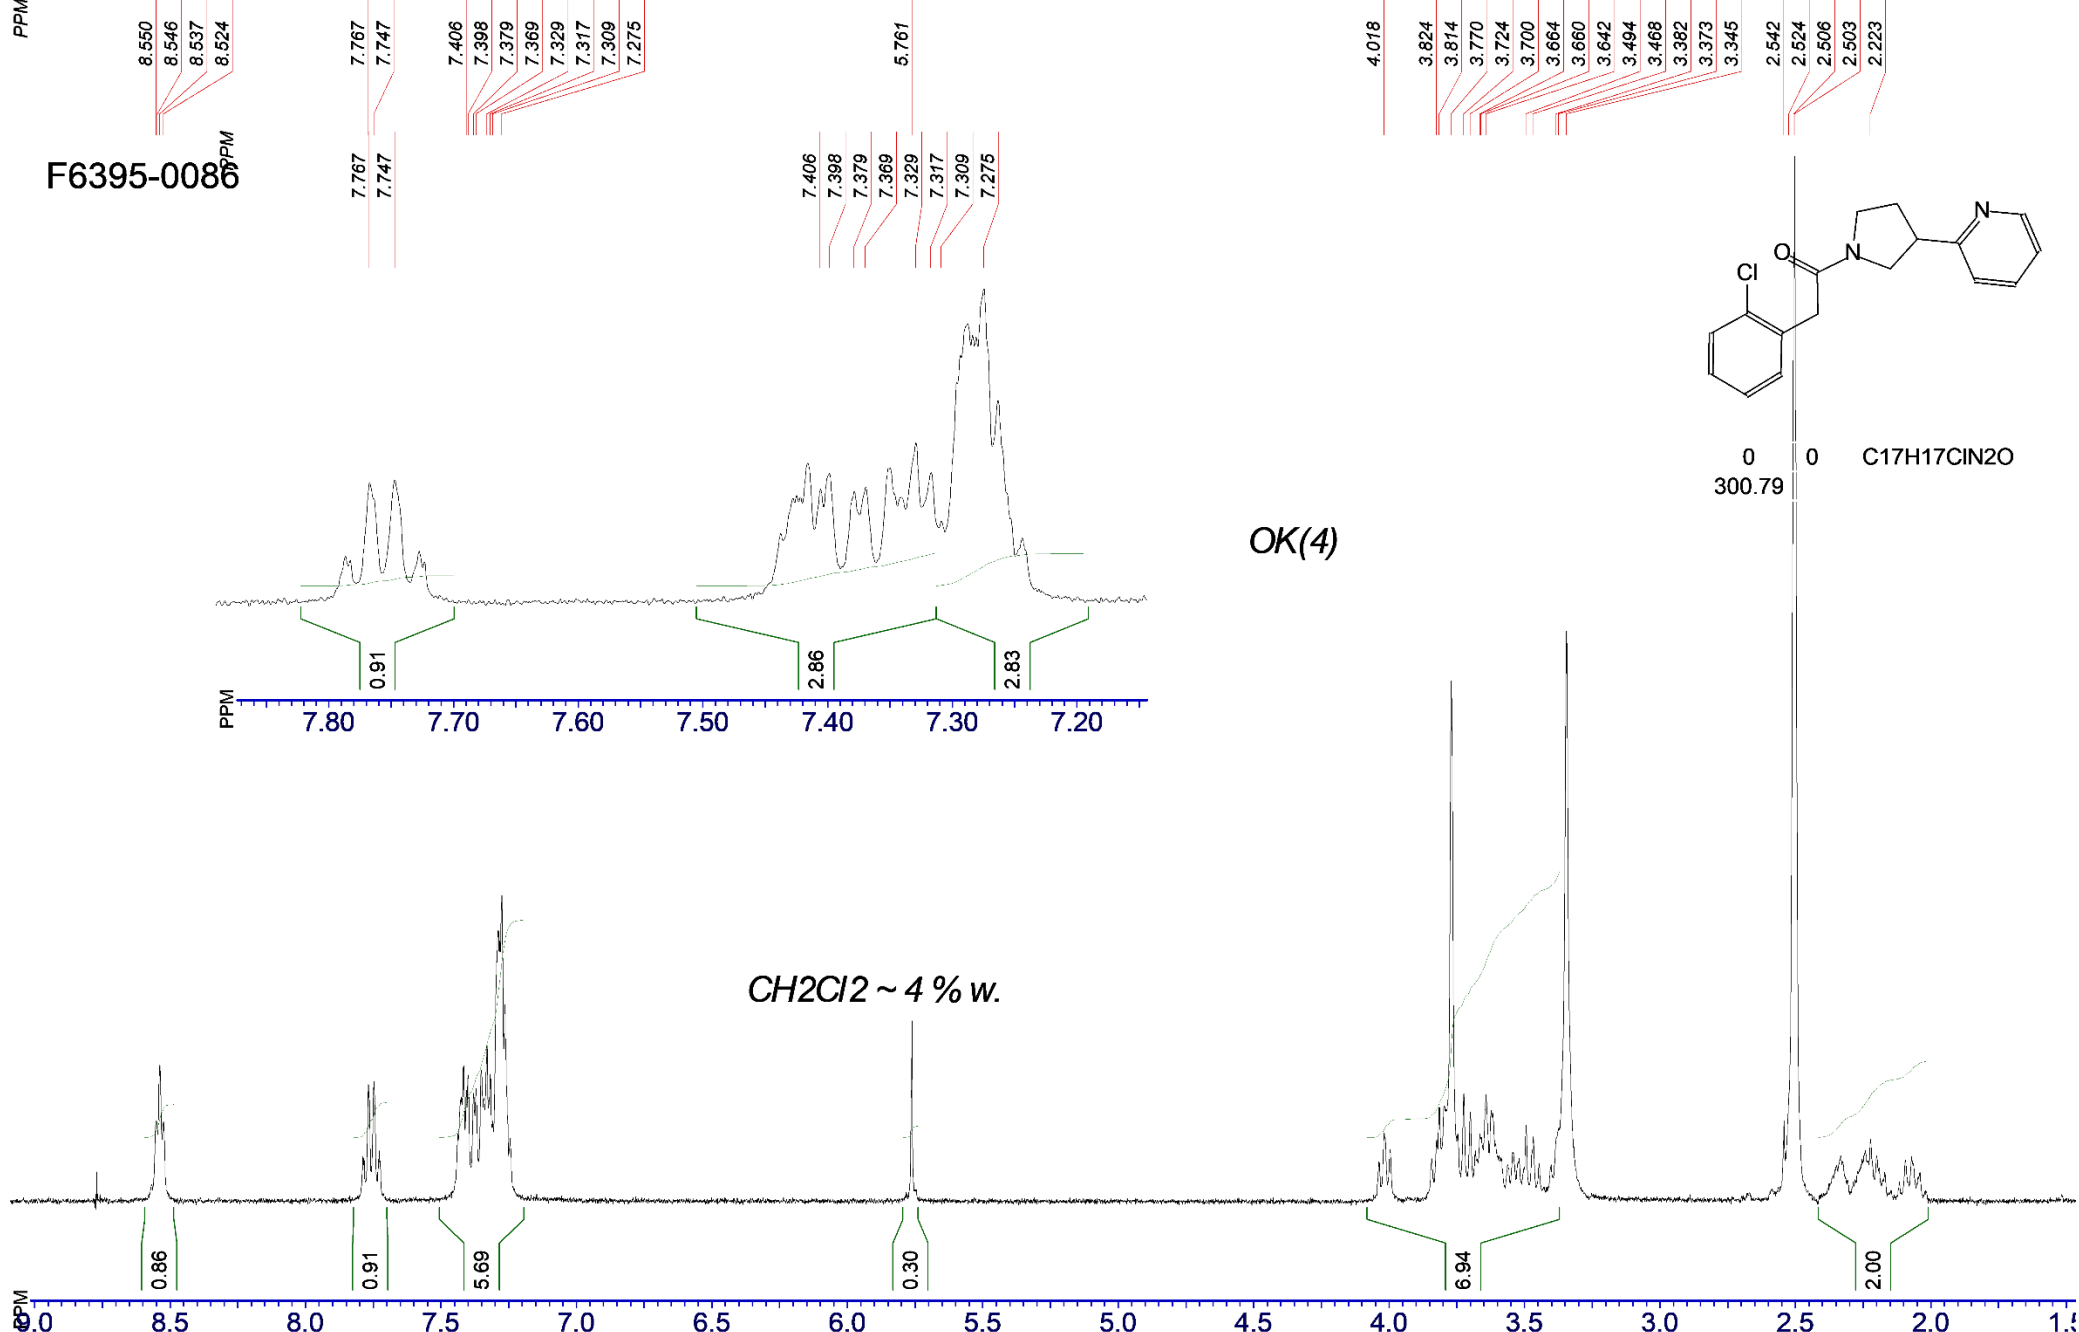

|                       |                    |                                             |                     |                      |
|-----------------------|--------------------|---------------------------------------------|---------------------|----------------------|
| File name: F6395-0086 | Expert: M.Pyanova  | SF: 400.0778 MHz; sw: 8000 Hz; at: 1.50 sec | NS: ; pw: 9,65 usec | SI: 65536, TD: 24000 |
| Date: 06_Nov_2015     | Solvent: DMSO 1027 |                                             | TE: 293 K           | block: S17287        |

- .o.- Syntez Purity Report - .o.-

Agilent 1200 LC/MSD  
 Diodearray G1315B (DAD1A-215nm; DAD1B-240nm)  
 Mass Quad G6140A (MSD1-Pos, MSD2-Neg)  
 ELSD Altech 3300 (ADC1 A, ELSD)

Mobile Phase: A-H<sub>2</sub>O+0.1HCOOH; B-MeCN+0.1HCOOH  
 Separation colu **96%**  
 Rapid Resolutionn HT Cartige 4.6x30mm,  
 1.8-Micron, Zorbax SB-C18

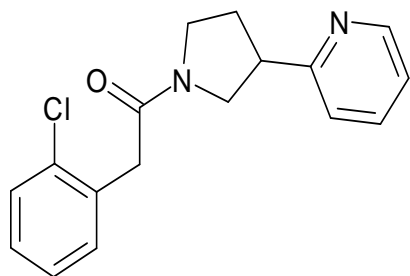

Mol.Weight: 300.79  
 Salt:

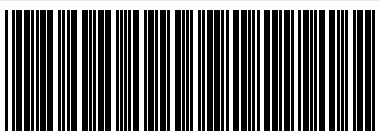

F6395-0086

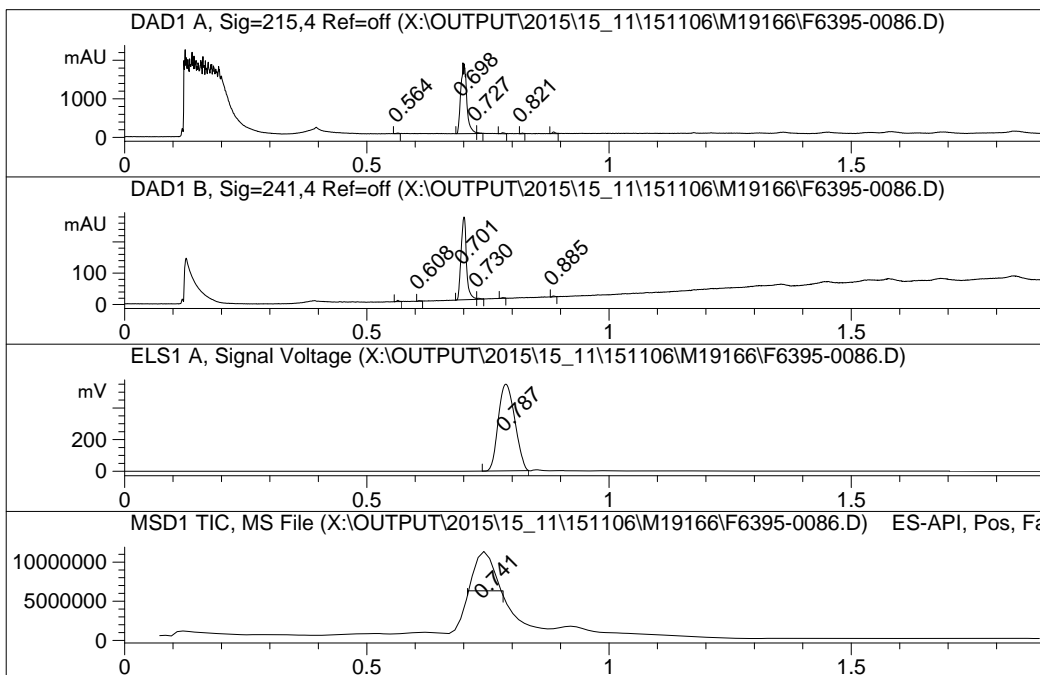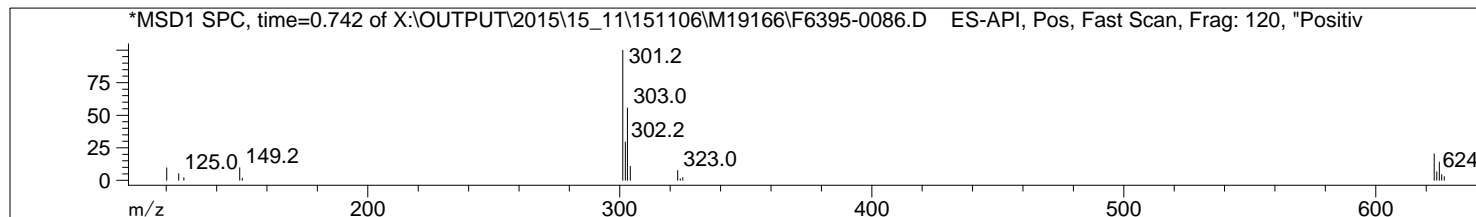

| # | Signal                    | R.Time | Area % |
|---|---------------------------|--------|--------|
| 1 | DAD1 A, Sig=215,4 Ref=off | 0.564  | 0.435  |
| 2 |                           | 0.698  | 96.784 |
| 3 |                           | 0.727  | 0.516  |
| 4 |                           | 0.780  | 0.670  |
| 5 |                           | 0.821  | 0.399  |
| 6 |                           | 0.885  | 1.196  |

  

| # | Signal                    | R.Time | Area % |
|---|---------------------------|--------|--------|
| 1 | DAD1 B, Sig=241,4 Ref=off | 0.564  | 0.622  |
| 2 |                           | 0.608  | 0.372  |
| 3 |                           | 0.701  | 97.190 |
| 4 |                           | 0.730  | 0.742  |
| 5 |                           | 0.781  | 0.435  |
| 6 |                           | 0.885  | 0.639  |

  

| # | Signal                 | R.Time | Area %  |
|---|------------------------|--------|---------|
| 1 | ELS1 A, Signal Voltage | 0.787  | 100.000 |

  

| # | Signal            | R.Time | Area %  |
|---|-------------------|--------|---------|
| 1 | MSD1 TIC, MS File | 0.741  | 100.000 |

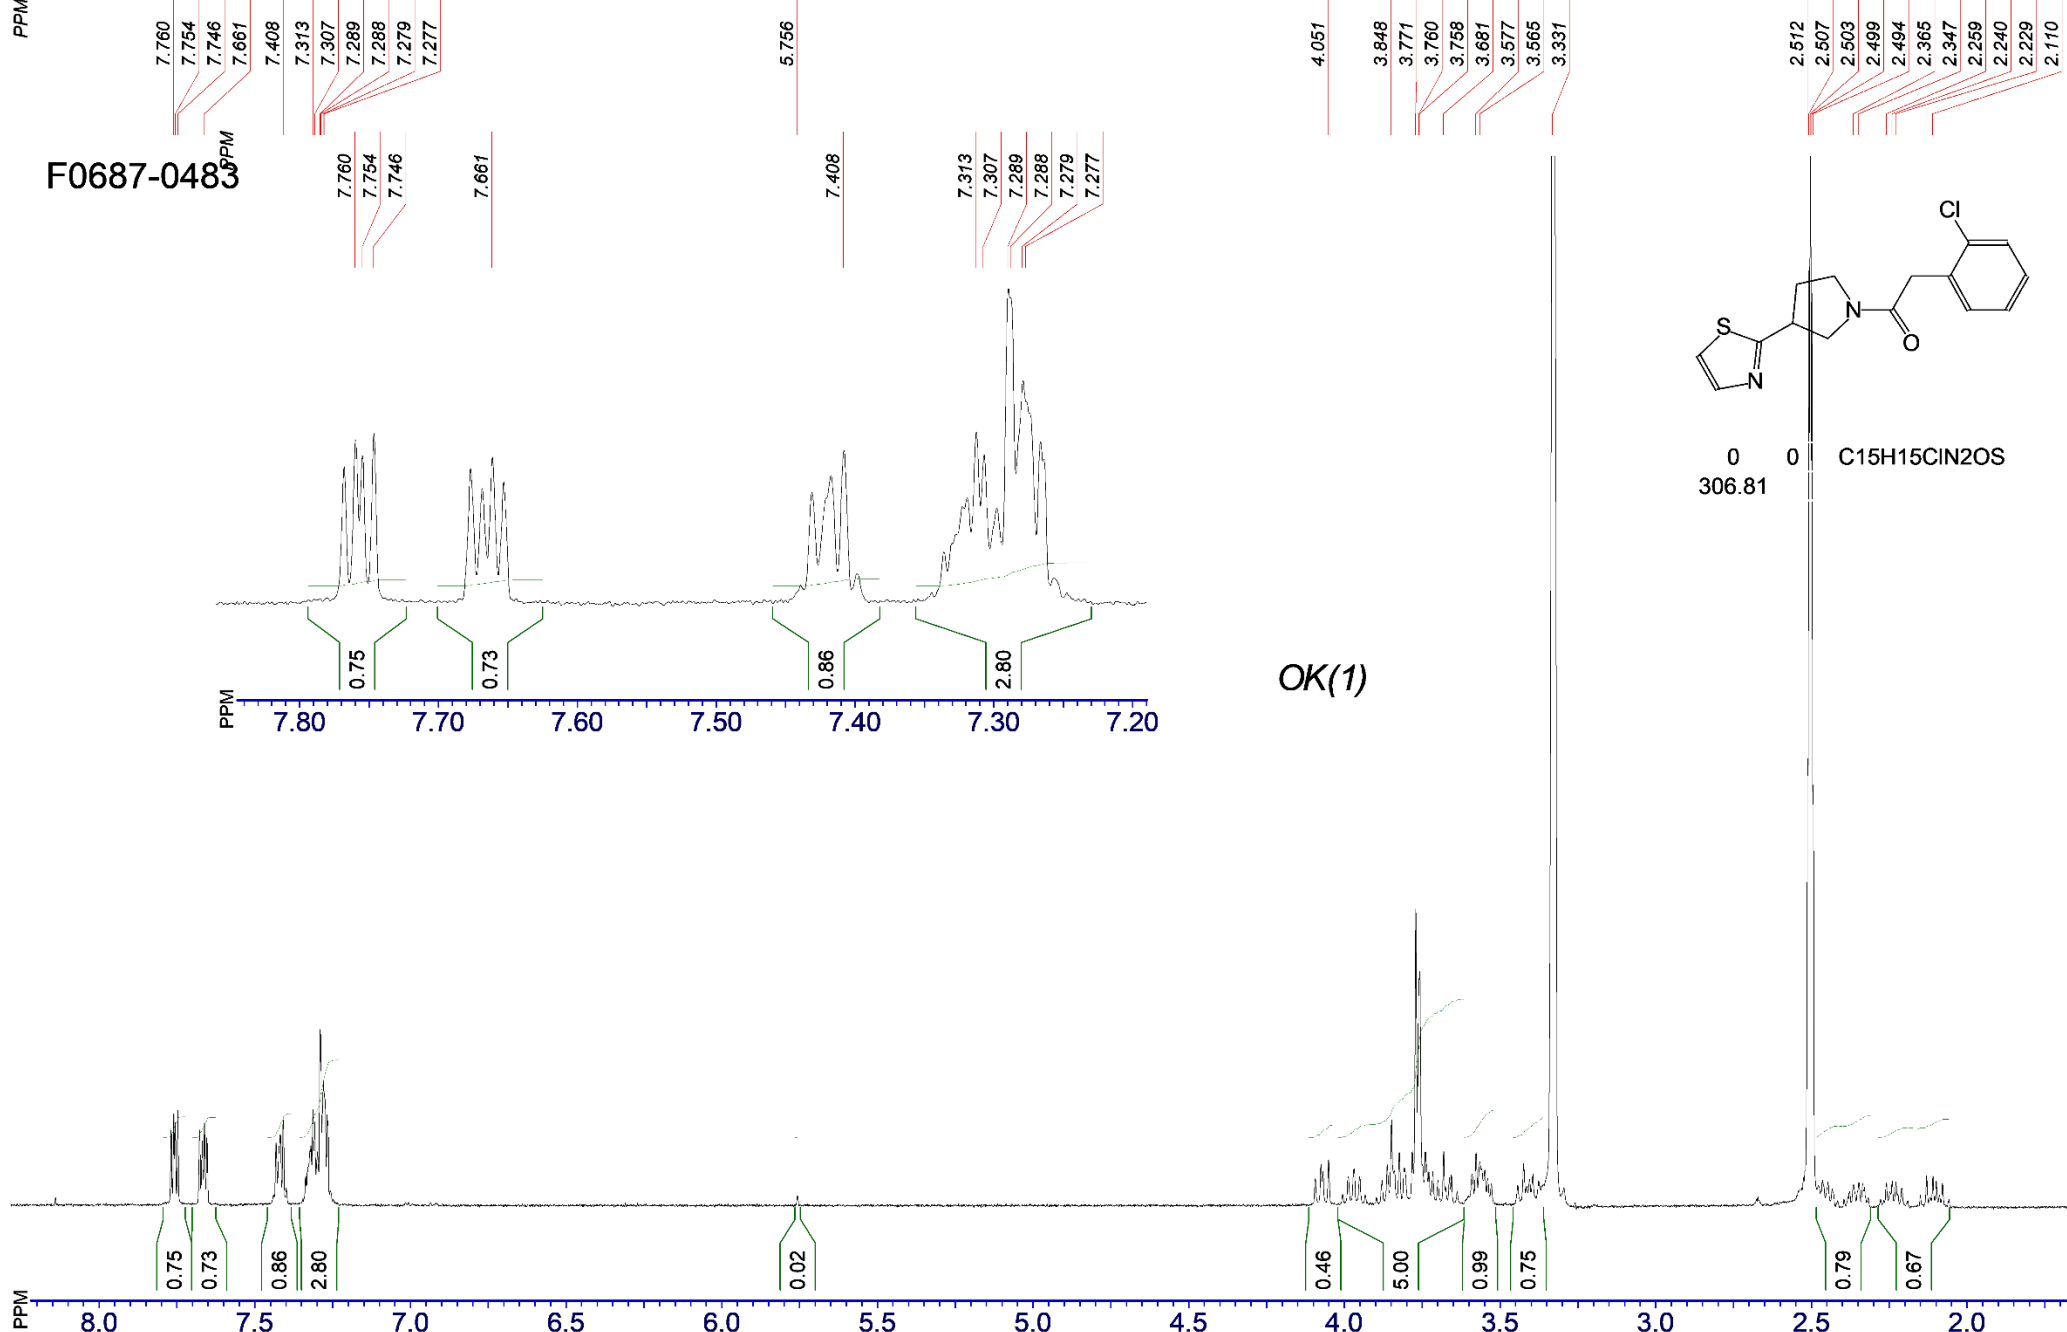

|                       |                   |                                             |                     |                      |
|-----------------------|-------------------|---------------------------------------------|---------------------|----------------------|
| File name: F0687-0483 | Expert: M.Pyanova | SF: 400.0778 MHz; sw: 8000 Hz; at: 1.50 sec | NS: ; pw: 9,65 usec | SI: 65536, TD: 24000 |
| Date: 26_Oct_2015     | Solvent: DMSO new |                                             | TE: 293 K           | block: S17133        |



- .o.-Syntez Purity Report - .o.-

Agilent 1200 LC/MSD  
Diodearray G1315B (DAD1A-215nm; DAD1B-240nm)  
Mass Quad G6140A (MSD1-Pos, MSD2-Neg)  
ELSD Altech 3300 (ADC1 A, ELSD)

Mobile Phase:A-H2O+0.1HCOOH;B-MeCN+0.1HCOOH  
Separation col: **100 %**  
Rapid Resolutionn HT Cartige 4.6x30mm,  
1.8-Micron, Zorbax SB-C18

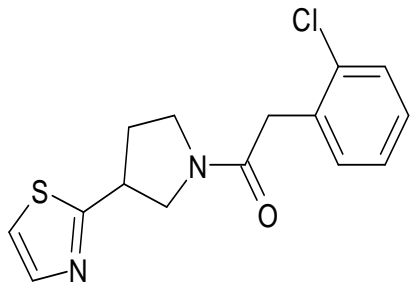

Mol.Weight: 306.82  
Salt:

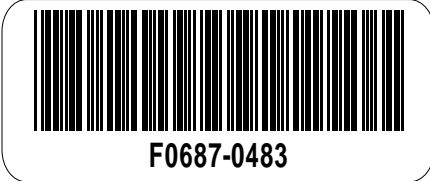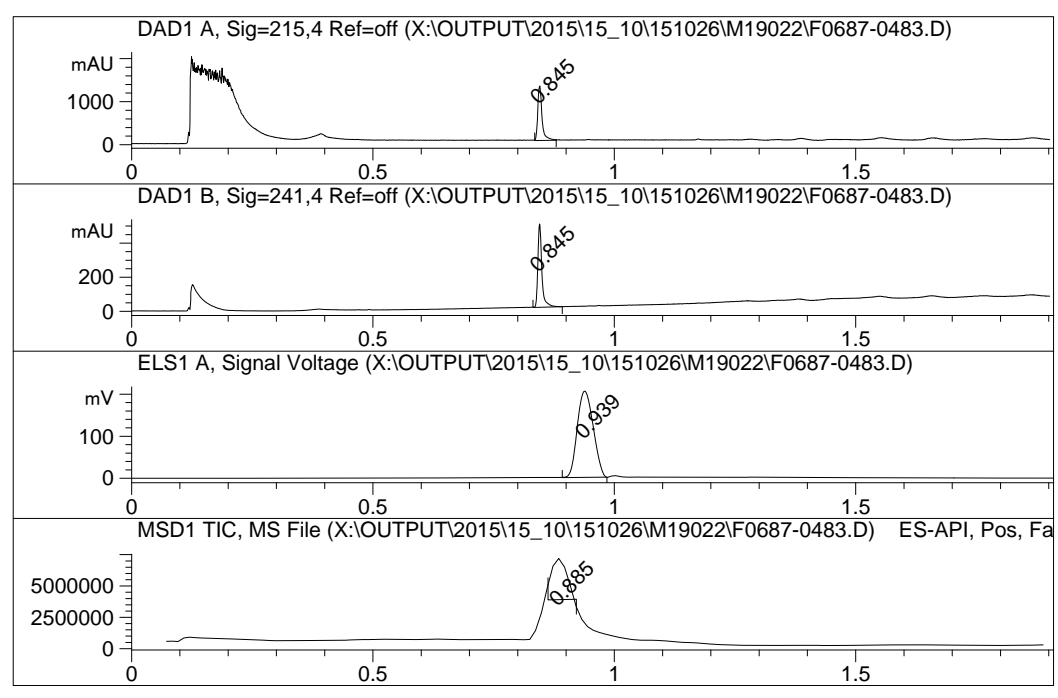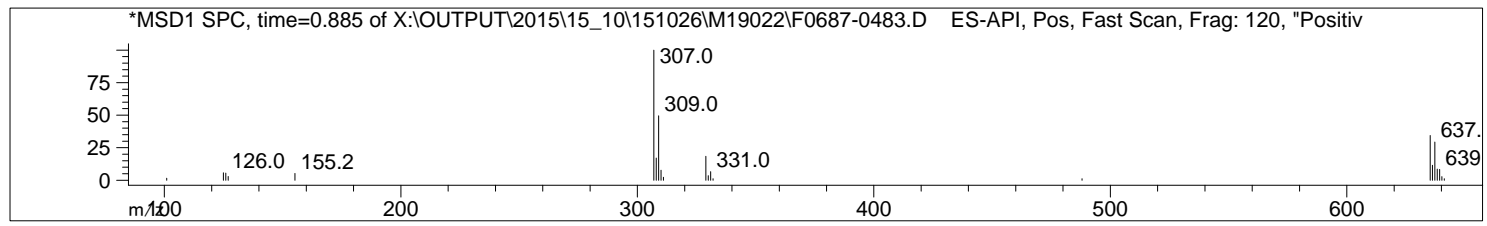

| # | Signal                    | R.Time | Area %  |
|---|---------------------------|--------|---------|
| 1 | DAD1 A, Sig=215,4 Ref=off | 0.845  | 100.000 |
| 1 | DAD1 B, Sig=241,4 Ref=off | 0.845  | 100.000 |
| 1 | ELS1 A, Signal Voltage    | 0.939  | 100.000 |
| 1 | MSD1 TIC, MS File         | 0.885  | 100.000 |

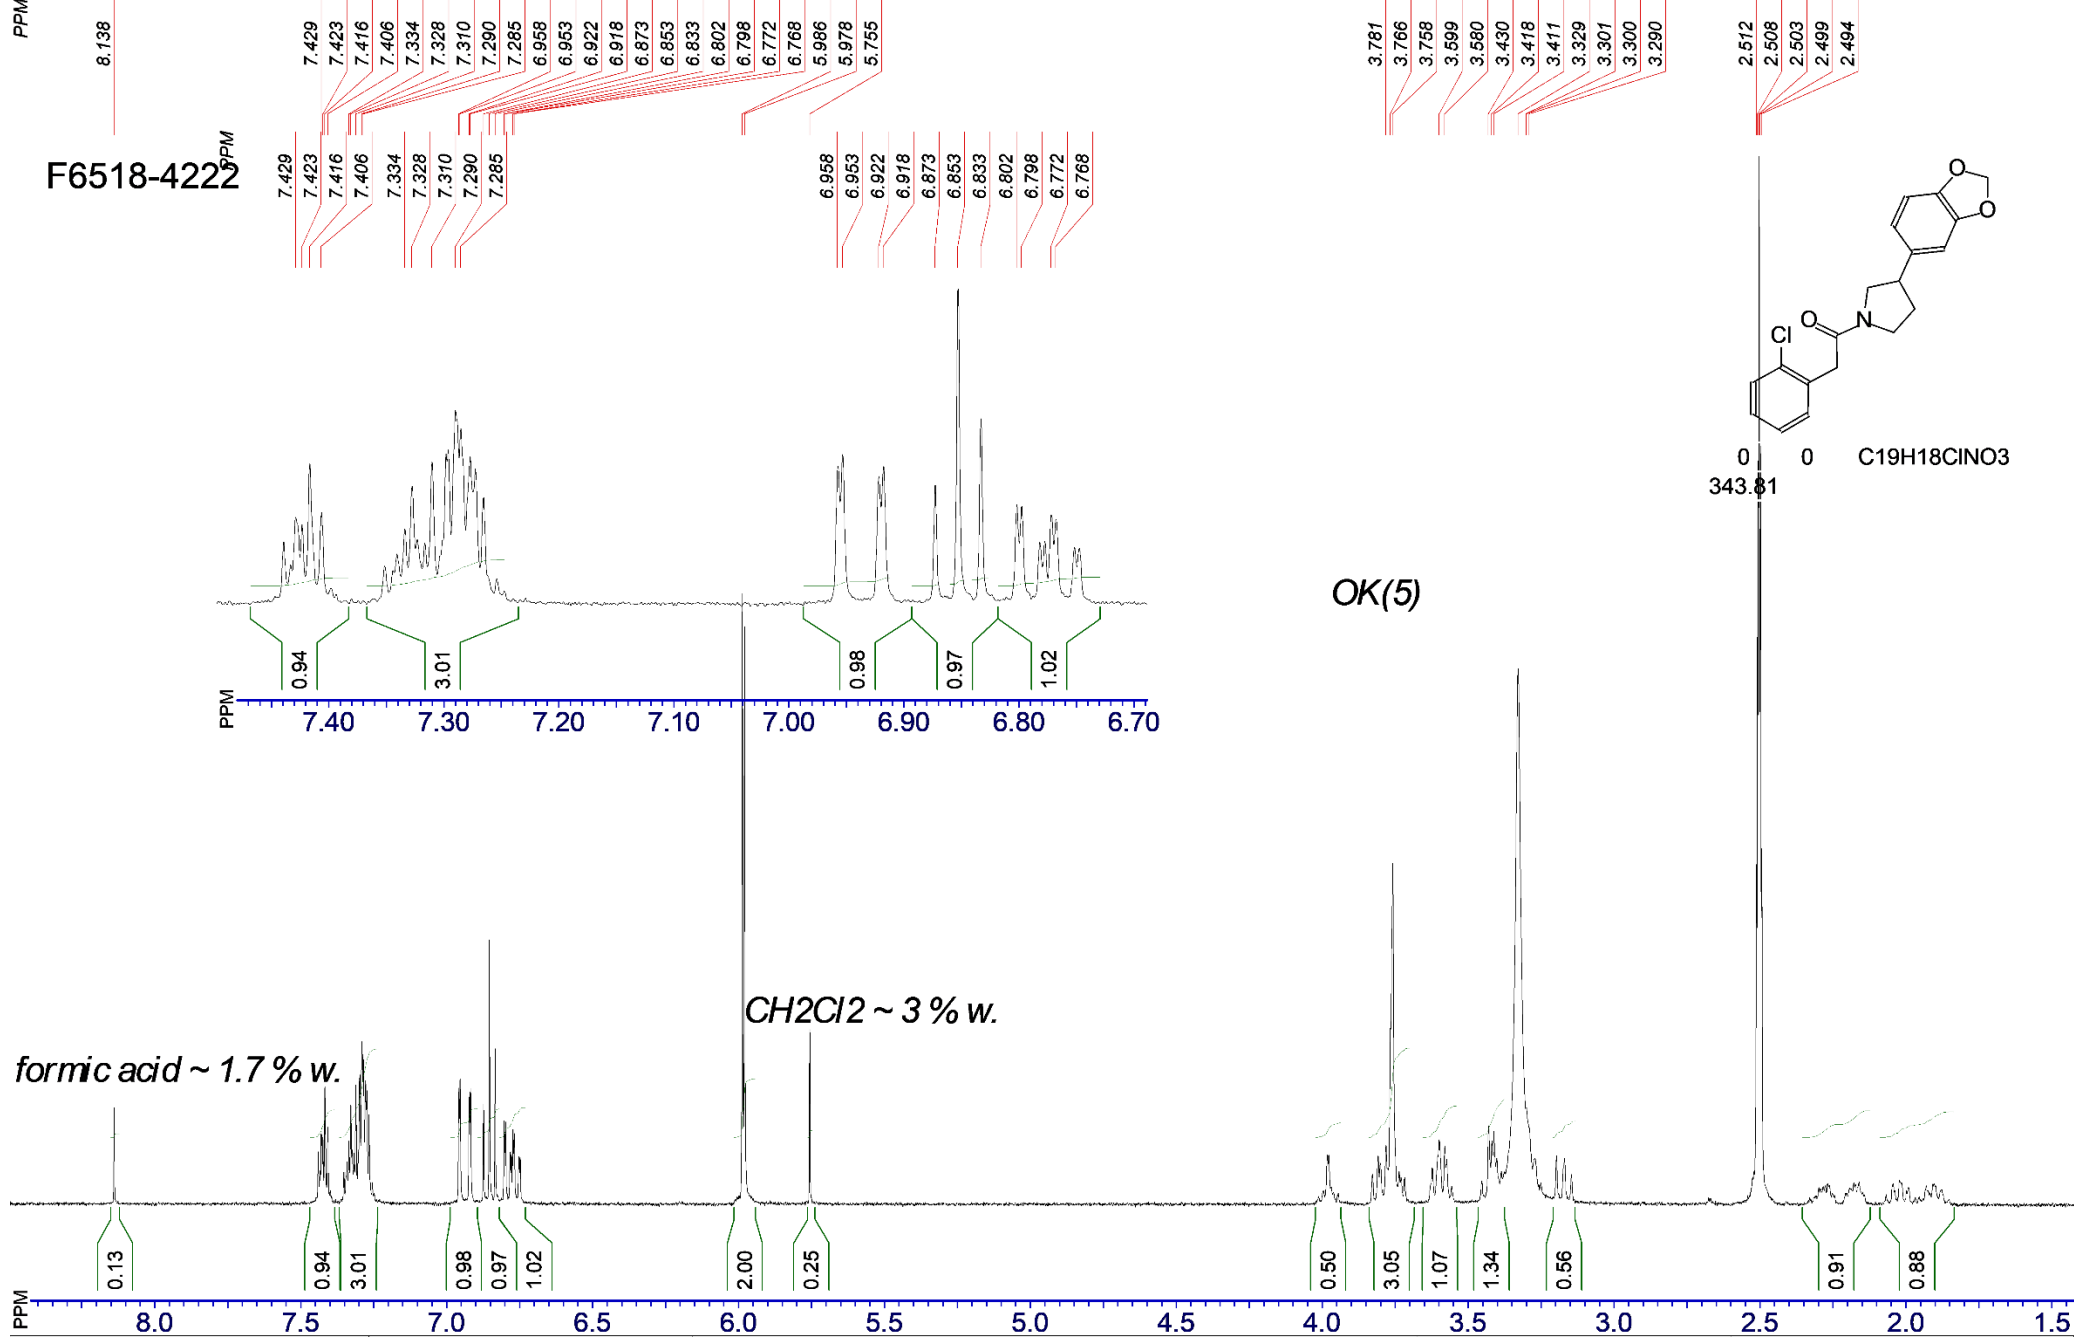

|                       |                   |                                             |                     |                      |
|-----------------------|-------------------|---------------------------------------------|---------------------|----------------------|
| File name: F6518-4222 | Expert: M.Pyanova | SF: 400.0778 MHz; sw: 8000 Hz; at: 1.50 sec | NS: ; pw: 9,65 usec | SI: 65536, TD: 24000 |
| Date: 26_Oct_2015     | Solvent: DMSO new |                                             | TE: 293 K           | block: S17133        |

- .o.- Syntez Purity Report - .o.-

Agilent 1200 LC/MSD  
Diodearray G1315B (DAD1A-215nm; DAD1B-240nm)  
Mass Quad G6140A (MSD1-Pos, MSD2-Neg)  
ELSD Altech 3300 (ADC1 A, ELSD)

Mobile Phase: A-H2O+0.1HCOOH; B-MeCN+0.1HCOOH  
Separation col: **99%**  
Rapid Resolutionn HT Cartige 4.6x30mm,  
1.8-Micron, Zorbax SB-C18

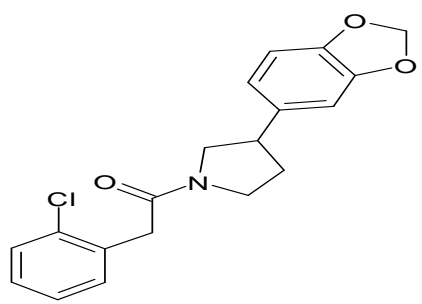

Mol.Weight: 343.81  
Salt:

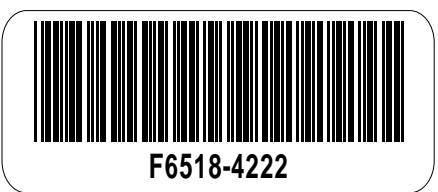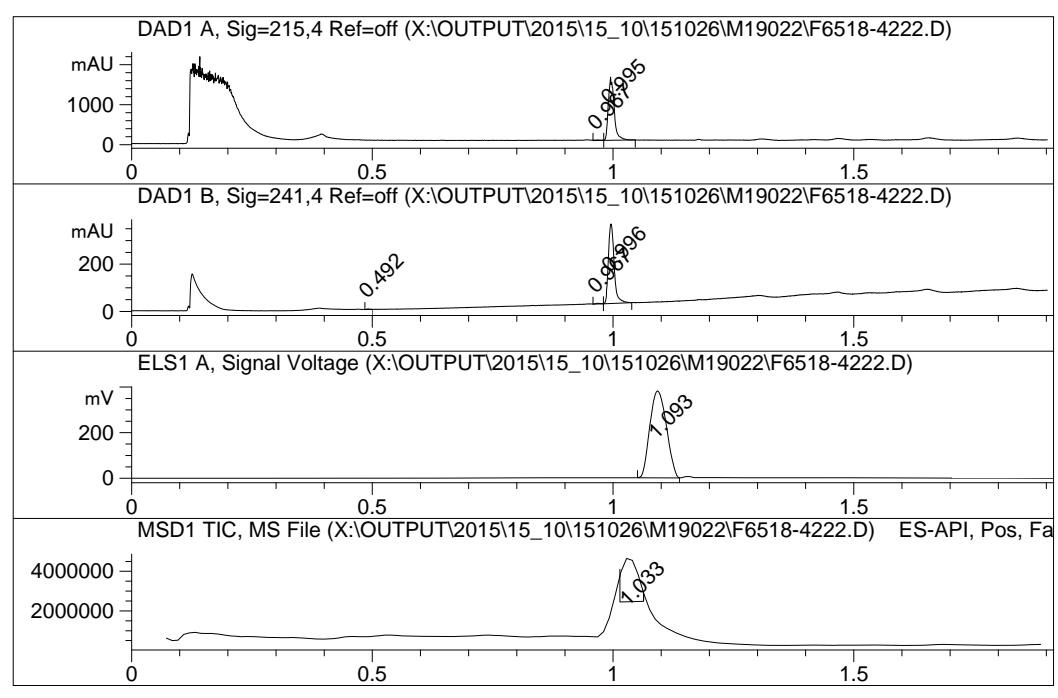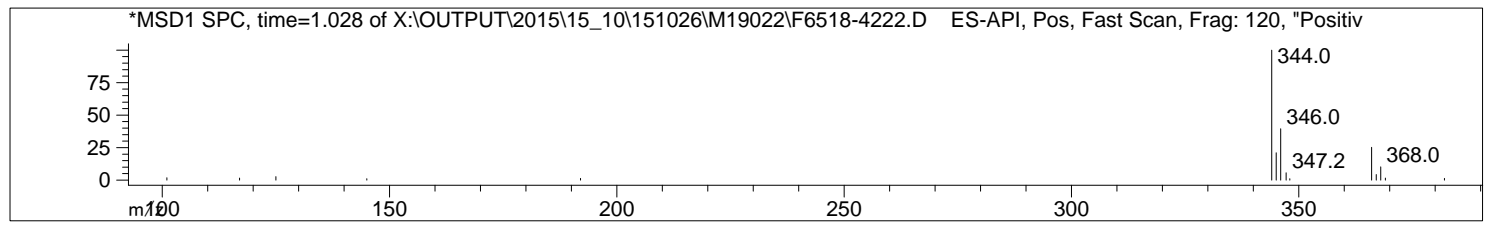

| # | Signal                    | R.Time | Area %  |
|---|---------------------------|--------|---------|
| 1 | DAD1 A, Sig=215,4 Ref=off | 0.967  | 0.953   |
| 2 |                           | 0.995  | 99.047  |
| # | Signal                    | R.Time | Area %  |
| 1 | DAD1 B, Sig=241,4 Ref=off | 0.492  | 0.489   |
| 2 |                           | 0.967  | 0.699   |
| 3 |                           | 0.996  | 98.812  |
| # | Signal                    | R.Time | Area %  |
| 1 | ELS1 A, Signal Voltage    | 1.093  | 100.000 |
| # | Signal                    | R.Time | Area %  |
| 1 | MSD1 TIC, MS File         | 1.033  | 100.000 |

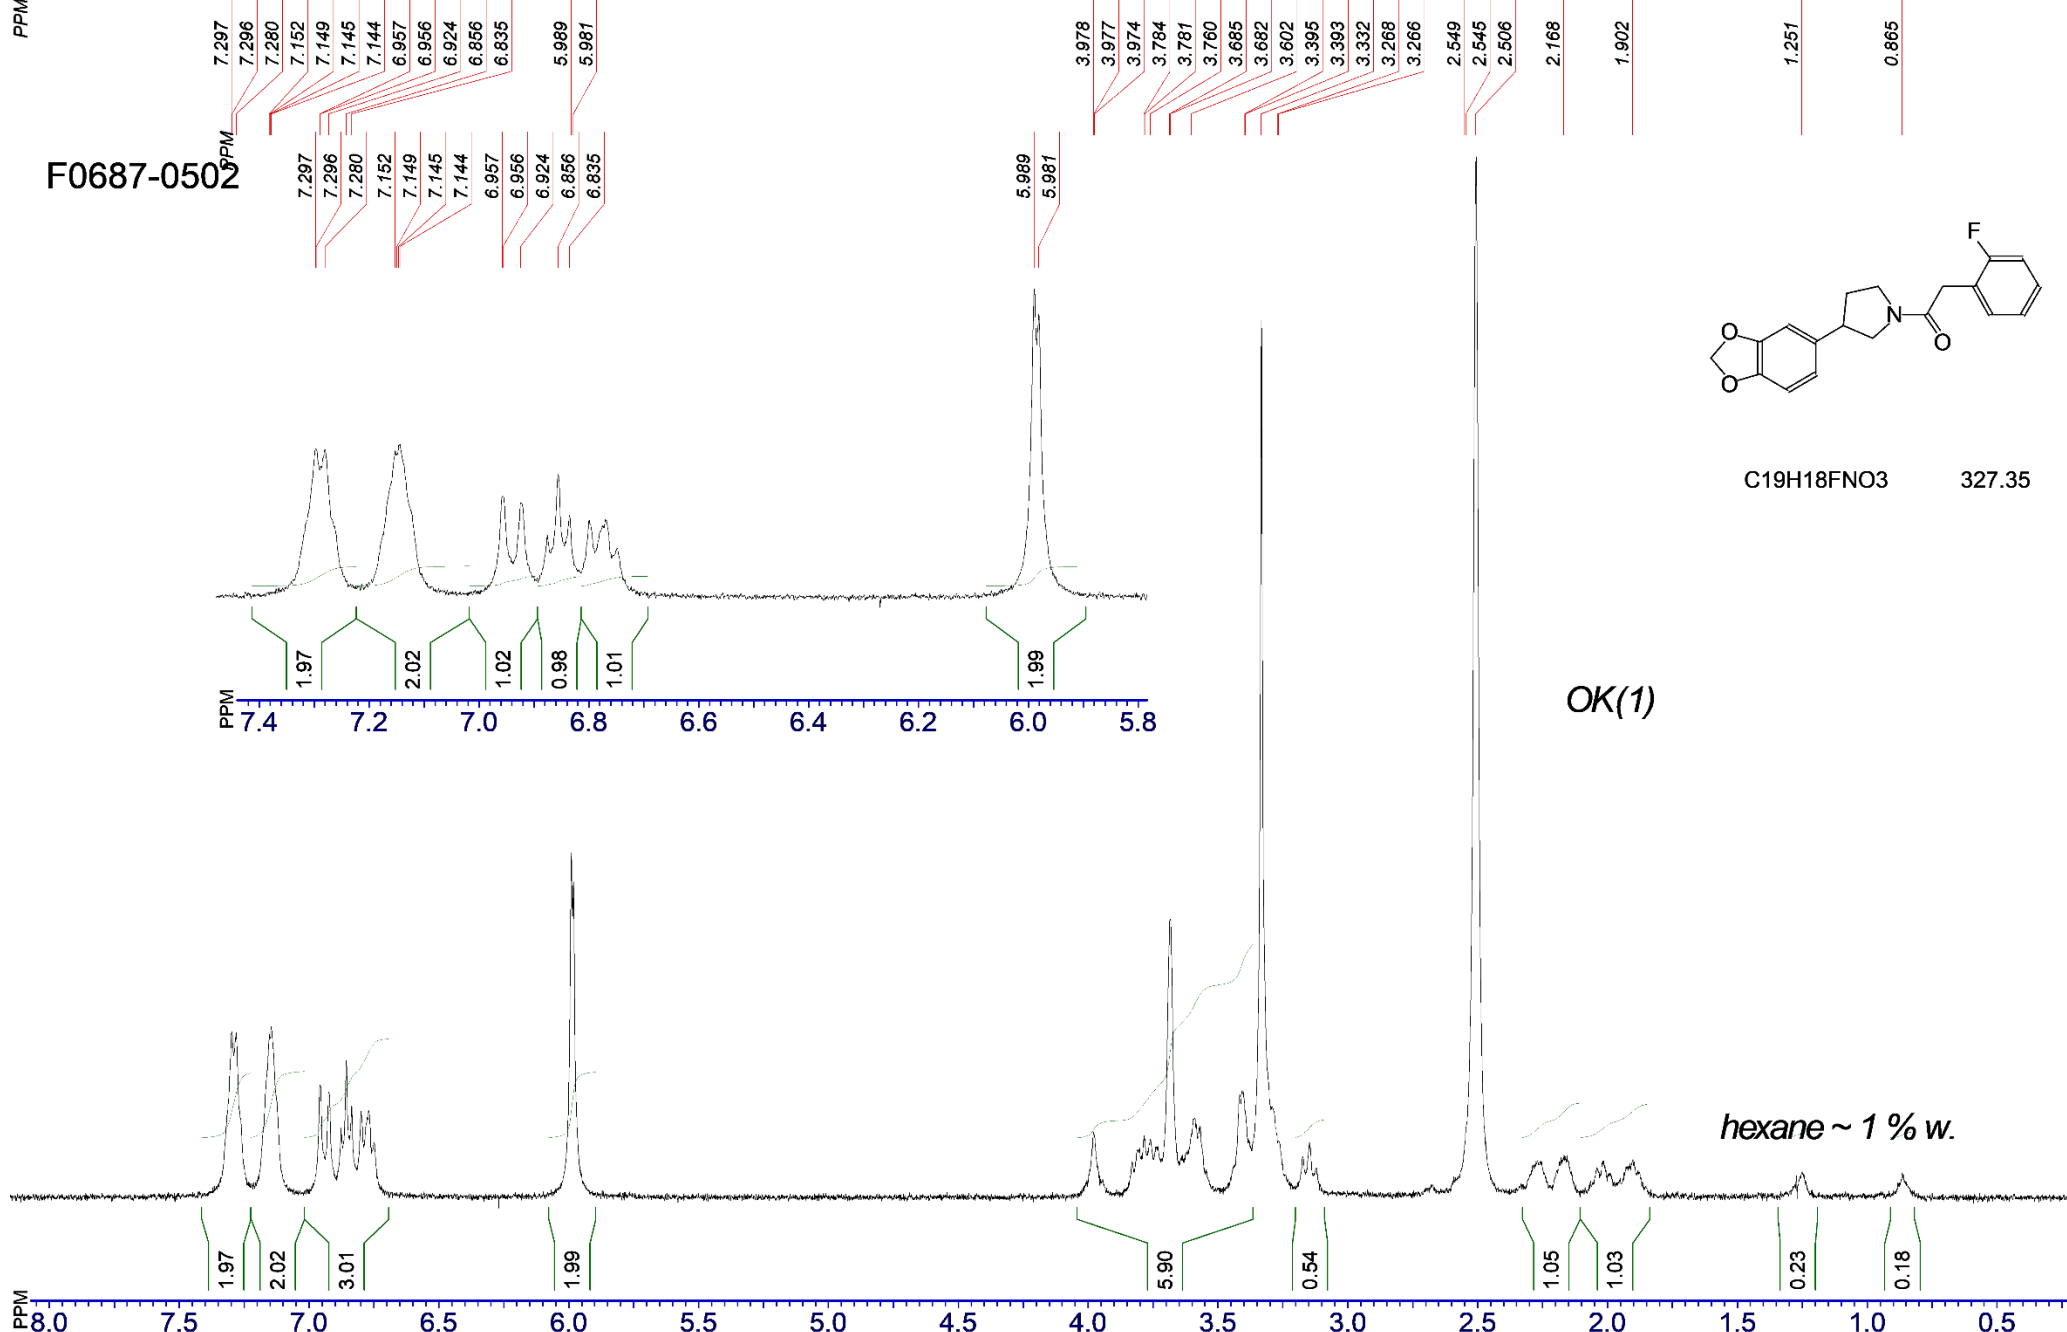

|                              |                    |                                             |                     |                      |
|------------------------------|--------------------|---------------------------------------------|---------------------|----------------------|
| File name: <b>F0687-0502</b> | Expert: M.Pyanova  | SF: 400.0778 MHz; sw: 8000 Hz; at: 1.50 sec | NS: ; pw: 9,65 usec | SI: 65536, TD: 24000 |
| Date: 22_Mar_2016            | Solvent: DMSO 0315 |                                             | TE: 293 K           | block: S18666        |

-.o.-Syntez Purity Report -.o.-

Agilent 1100 LC/MSD SL  
 Diodearray G1315B (DAD1A-215nm; DAD1B-254nm)  
 Mass Quad G1956B (MSD1-Pos, MSD2-Neg)  
 ELSD Altech 3300 (ADC1 A, ELSD)

Mobile Phase:A-H<sub>2</sub>O+0.1%HCOOH;B-MeCN+0.1HCOOH  
 Separation column  
 Rapid Resolutionn HPL Cartridge 4.6x30mm,  
 1.8-Micron, Zorbax SB C-18

**100 %**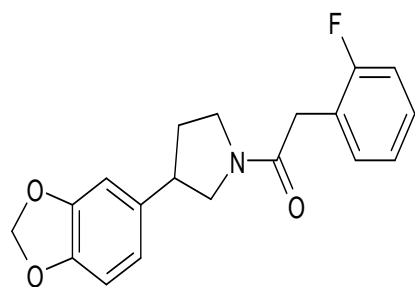

Mol.Weight: 327.35  
 Salt:

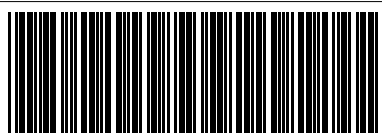

F0687-0502

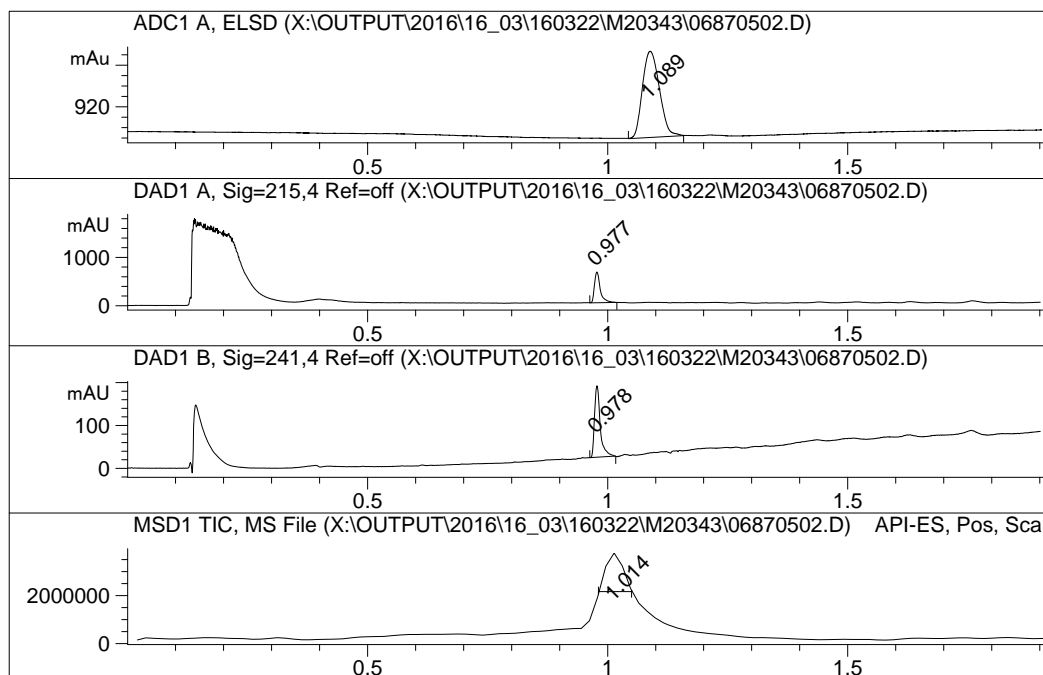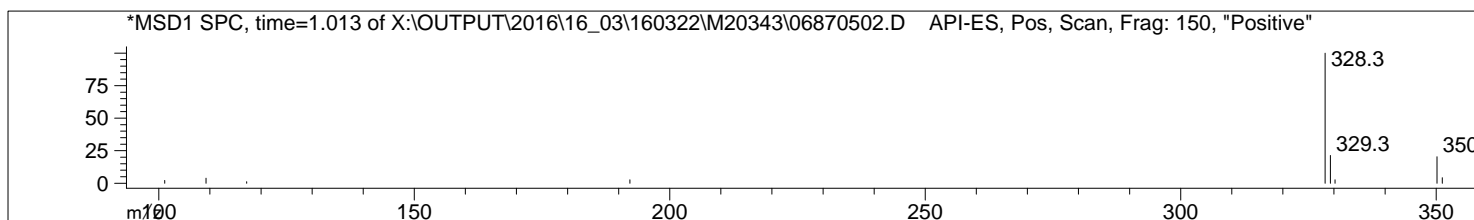

| # | Signal                    | R.Time | Area %  |
|---|---------------------------|--------|---------|
| 1 | ADC1 A, ELSD              | 1.089  | 100.000 |
| # | Signal                    | R.Time | Area %  |
| 1 | DAD1 A, Sig=215,4 Ref=off | 0.977  | 100.000 |
| # | Signal                    | R.Time | Area %  |
| 1 | DAD1 B, Sig=241,4 Ref=off | 0.978  | 100.000 |
| # | Signal                    | R.Time | Area %  |
| 1 | MSD1 TIC, MS File         | 1.014  | 100.000 |

PPM

F0687-0503

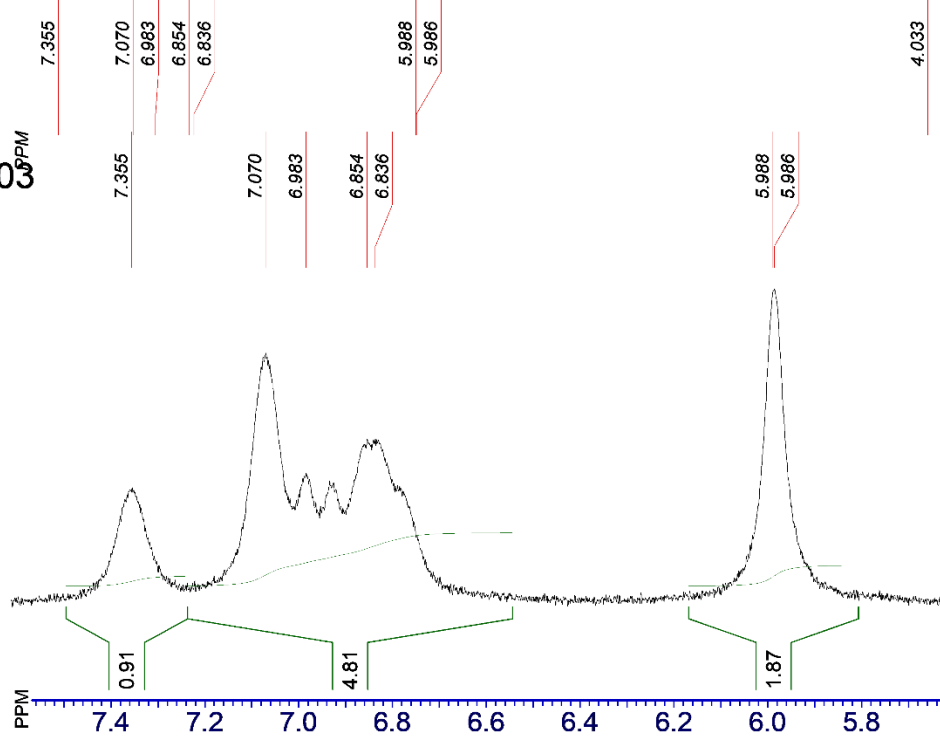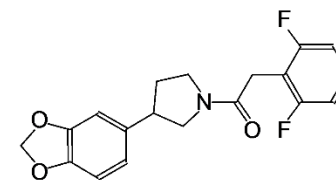C<sub>19</sub>H<sub>17</sub>F<sub>2</sub>NO<sub>3</sub>

345.34

OK(1)

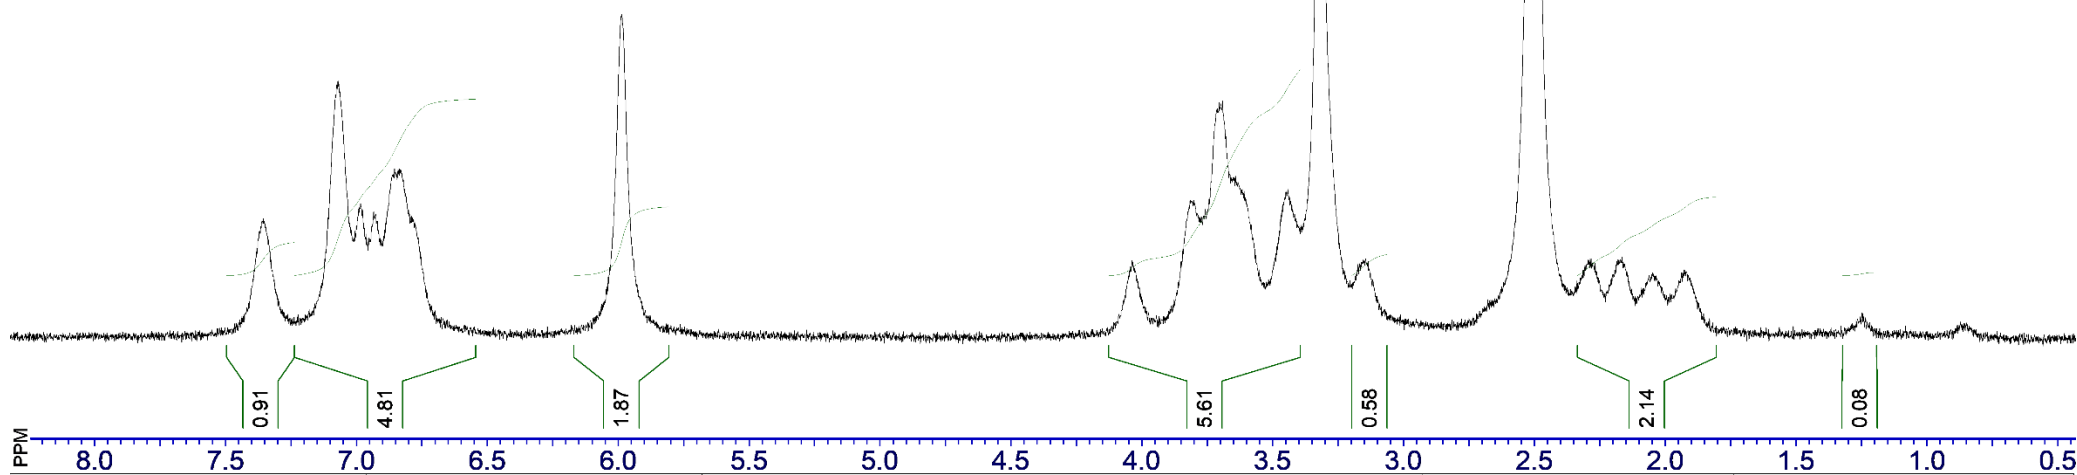

File name: F0687-0503

Expert: M.Pyanova

SF: 400.0778 MHz; sw: 8000 Hz; at: 1.50 sec

NS: ; pw: 9,65 usec

SI: 65536, TD: 24000

Date: 21\_Mar\_2016

Solvent: DMSO 0315

TE: 293 K

block: S18648

-.o.-Syntez Purity Report -.o.-

Agilent 1200 LC/MSD  
Diodearray G1315B (DAD1A-215nm; DAD1B-240nm)  
Mass Quad G6140A (MSD1-Pos, MSD2-Neg)  
ELSD Altech 3300 (ADC1 A, ELSD)

Mobile Phase:A-H2O+0.1HCOOH;B-MeCN+0.1HCOOH  
Separation column **99 %**  
Rapid Resolutionn HT Cartige 4.6x30mm,  
1.8-Micron, Zorbax SB-C18

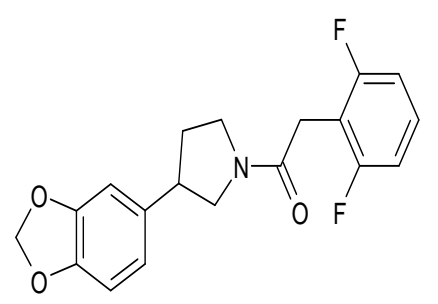

Mol.Weight: 345.34  
Salt:

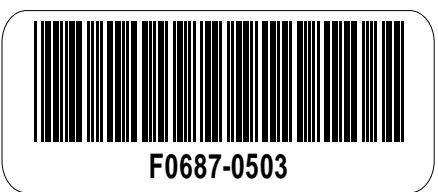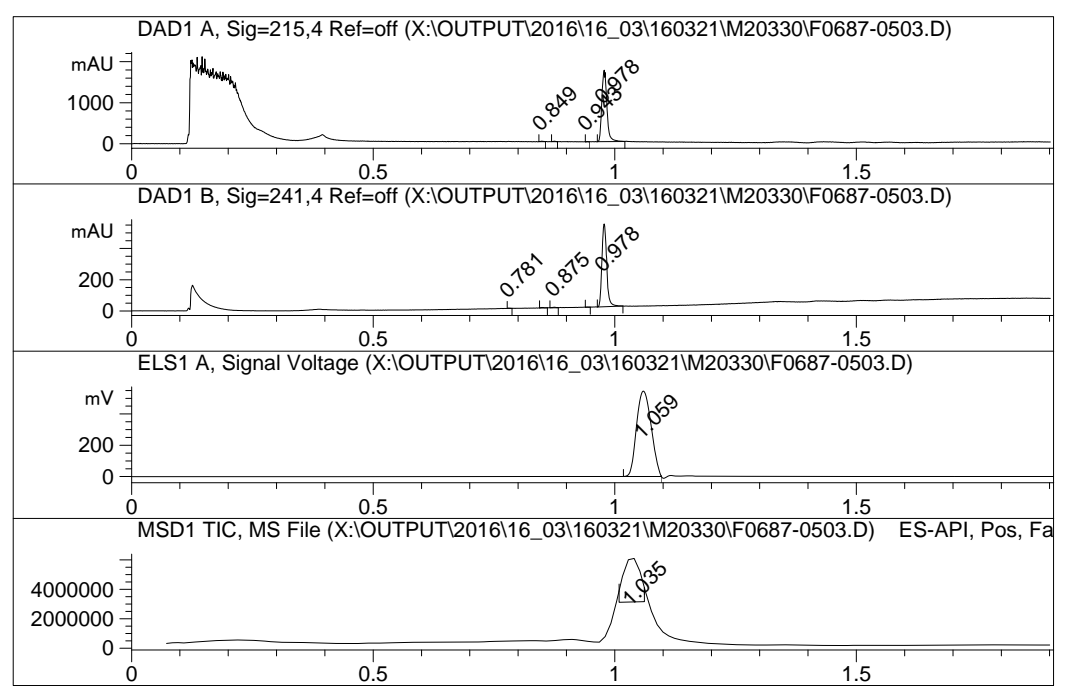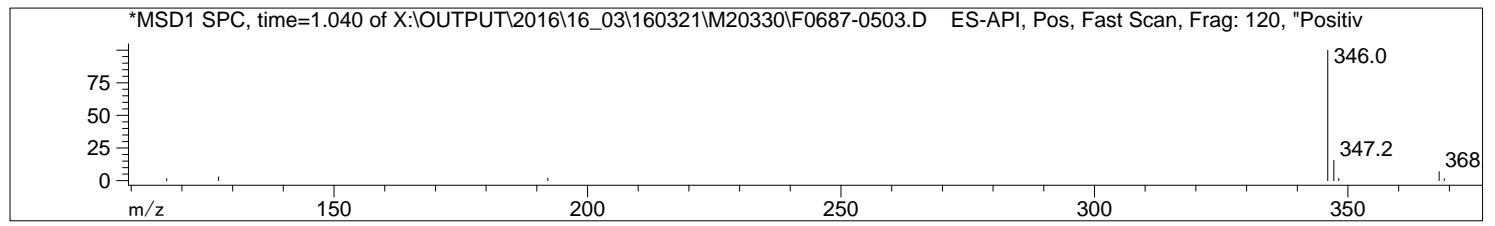

| #     | Signal                    | R.Time | Area %  |
|-------|---------------------------|--------|---------|
| 1     | DAD1 A, Sig=215,4 Ref=off | 0.849  | 0.442   |
| 2     |                           | 0.876  | 0.399   |
| 3     |                           | 0.943  | 0.152   |
| 4     |                           | 0.978  | 99.007  |
| ----- |                           |        |         |
| #     | Signal                    | R.Time | Area %  |
| 1     | DAD1 B, Sig=241,4 Ref=off | 0.781  | 0.249   |
| 2     |                           | 0.849  | 0.528   |
| 3     |                           | 0.875  | 0.495   |
| 4     |                           | 0.941  | 0.171   |
| 5     |                           | 0.978  | 98.556  |
| ----- |                           |        |         |
| #     | Signal                    | R.Time | Area %  |
| 1     | ELS1 A, Signal Voltage    | 1.059  | 100.000 |
| ----- |                           |        |         |
| #     | Signal                    | R.Time | Area %  |
| 1     | MSD1 TIC, MS File         | 1.035  | 100.000 |

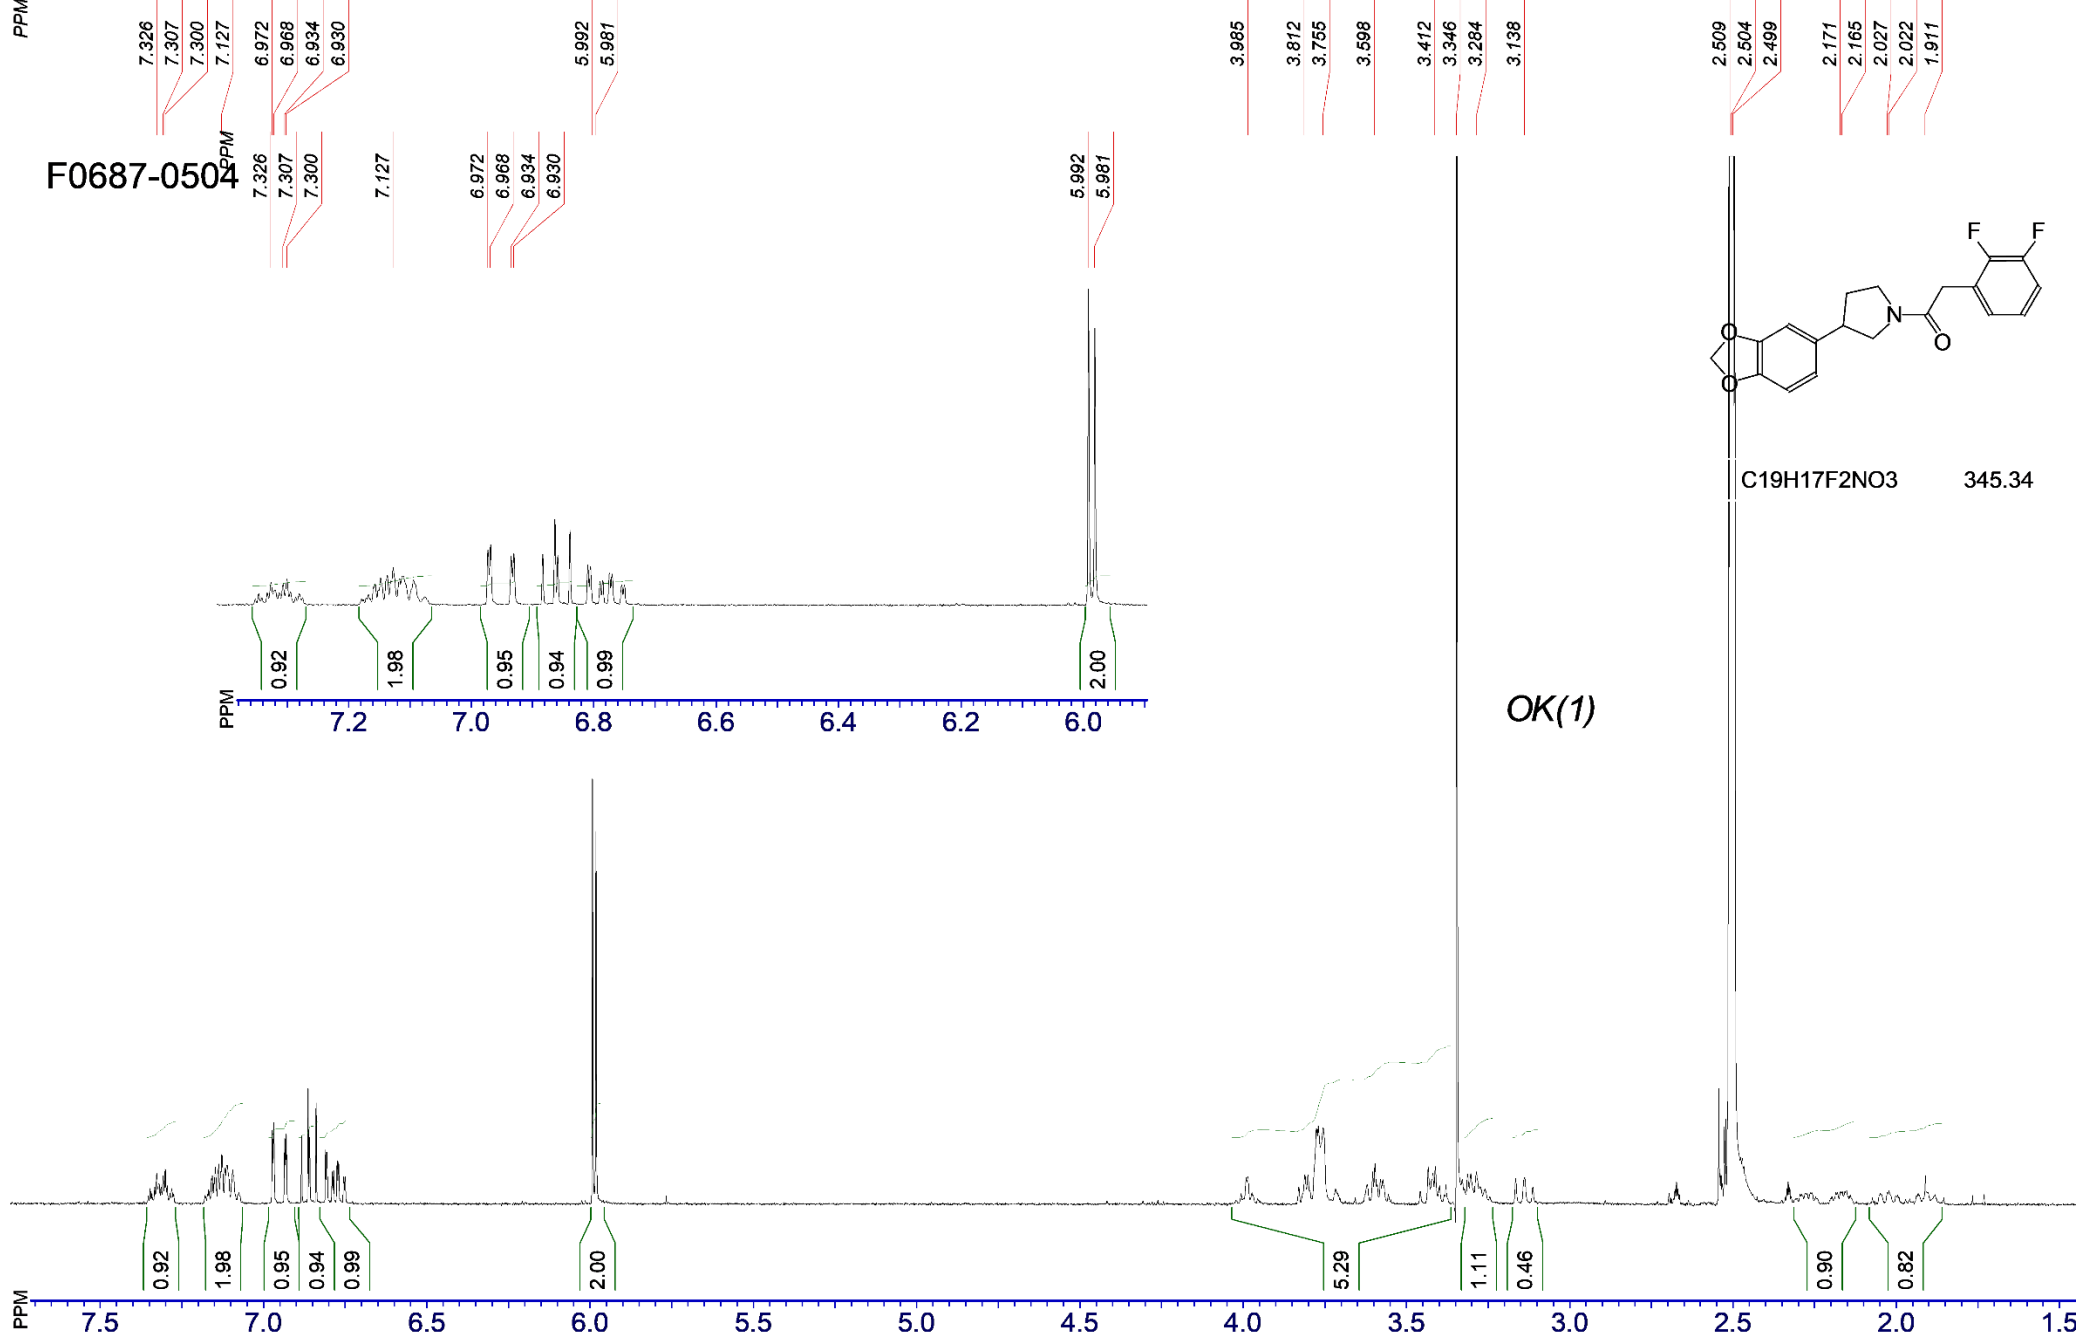

|                              |                    |                                             |                     |                      |
|------------------------------|--------------------|---------------------------------------------|---------------------|----------------------|
| File name: <b>F0687-0504</b> | Expert: M.Pyanova  | SF: 400.0778 MHz; sw: 8000 Hz; at: 1.50 sec | NS: ; pw: 9,65 usec | SI: 65536, TD: 24000 |
| Date: 28_Mar_2016            | Solvent: DMSO 0321 |                                             | TE: 293 K           | block: S18745        |



-.o.-Syntez Purity Report -.o.-

Agilent 1200 LC/MSD  
 Diodearray G1315B (DAD1A-215nm; DAD1B-240nm)  
 Mass Quad G6140A (MSD1-Pos, MSD2-Neg)  
 ELSD Altech 3300 (ADC1 A, ELSD)

Mobile Phase:A-H<sub>2</sub>O+0.1HCOOH;B-MeCN+0.1HCOOH  
 Separation colour **Non-informative**  
 Rapid Resolutionn HT Cartige 4.6x30mm,  
 1.8-Micron, Zorbax SB-C18

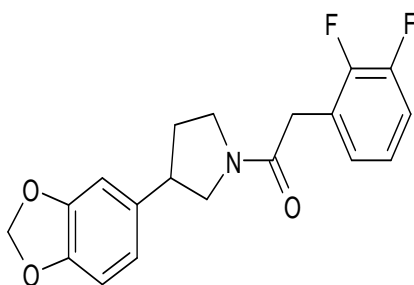

Mol.Weight: 345.34  
 Salt:

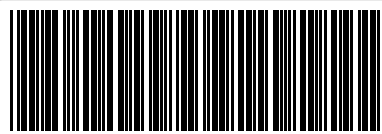

F0687-0504

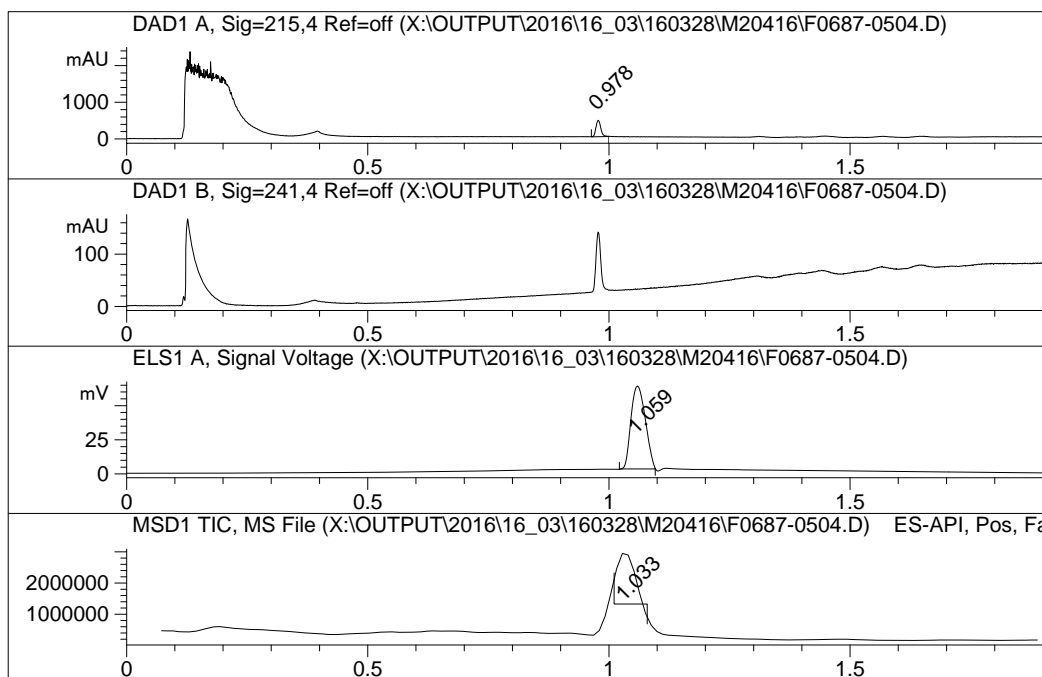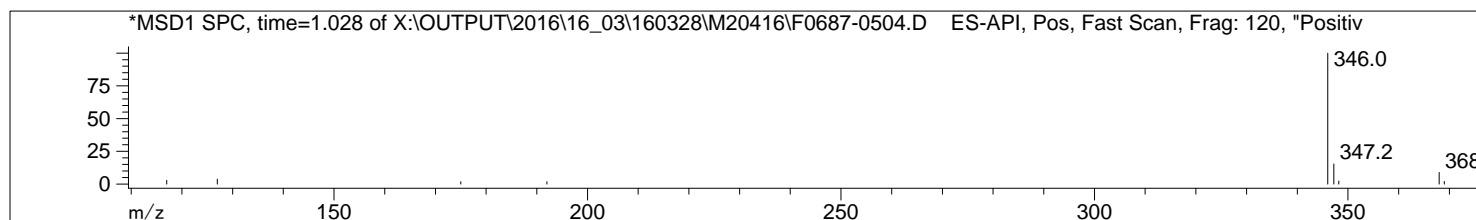

| # | Signal                    | R.Time | Area %  |
|---|---------------------------|--------|---------|
| 1 | DAD1 A, Sig=215,4 Ref=off | 0.978  | 100.000 |
| # | Signal                    | R.Time | Area %  |
| 1 | ELS1 A, Signal Voltage    | 1.059  | 100.000 |
| # | Signal                    | R.Time | Area %  |
| 1 | MSD1 TIC, MS File         | 1.033  | 100.000 |

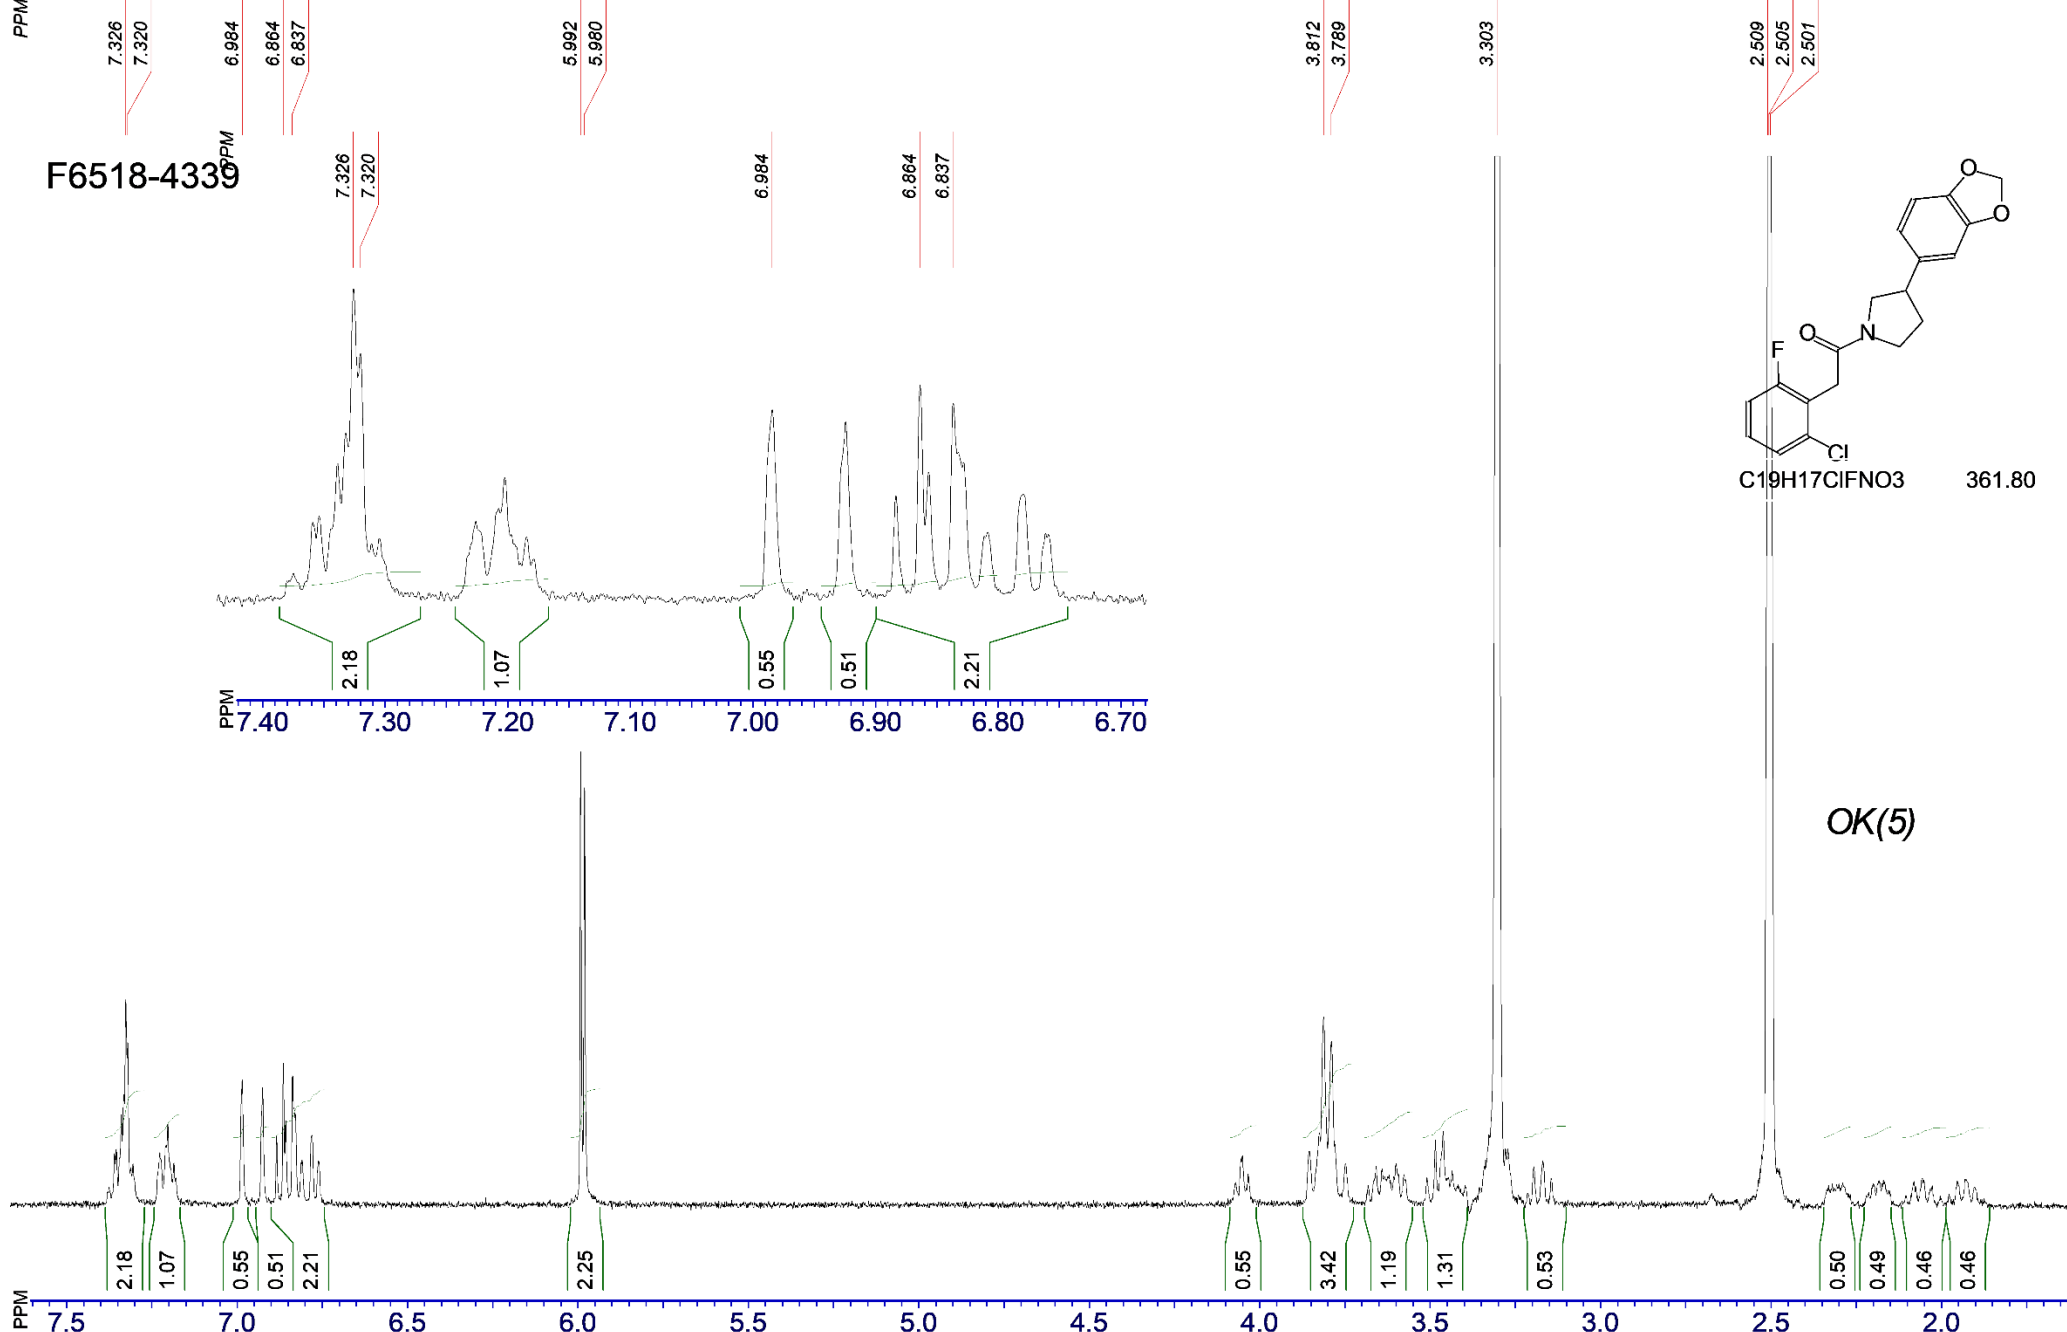

|                              |                     |                                             |                     |                      |
|------------------------------|---------------------|---------------------------------------------|---------------------|----------------------|
| File name: <b>F6518-4339</b> | Expert: A.Ryabitsky | SF: 400.0778 MHz; sw: 8000 Hz; at: 1.50 sec | NS: ; pw: 9,65 usec | SI: 65536, TD: 24000 |
| Date: 09_dec_2015            | Solvent: DMSO new   |                                             | TE: 293 K           | block: S17623        |

-.o.-Syntez Purity Report -.o.-

Agilent 1100 LC/MSD SL  
 Diodearray G1315B (DAD1A-215nm; DAD1B-254nm)  
 Mass Quad G1956B (MSD1-Pos, MSD2-Neg)  
 ELSD Altech 3300 (ADC1 A, ELSD)

Mobile Phase:A-H<sub>2</sub>O+0.1%HCOOH;B-MeCN+0.1HCOOH  
 Separation column:  
 Rapid Resolution HPLC Cartridge 4.6x300mm,  
 1.8-Micron, Zorbax SB C-18

**100 %**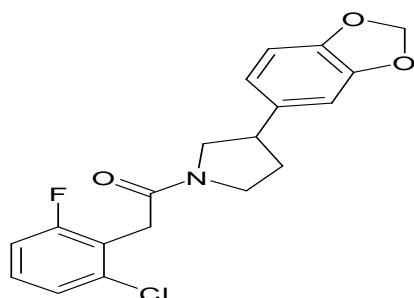

Mol.Weight: 361.8  
 Salt:

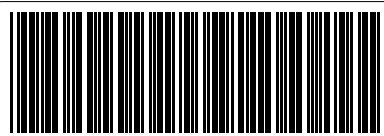

F6518-4339

M19467

-&gt;

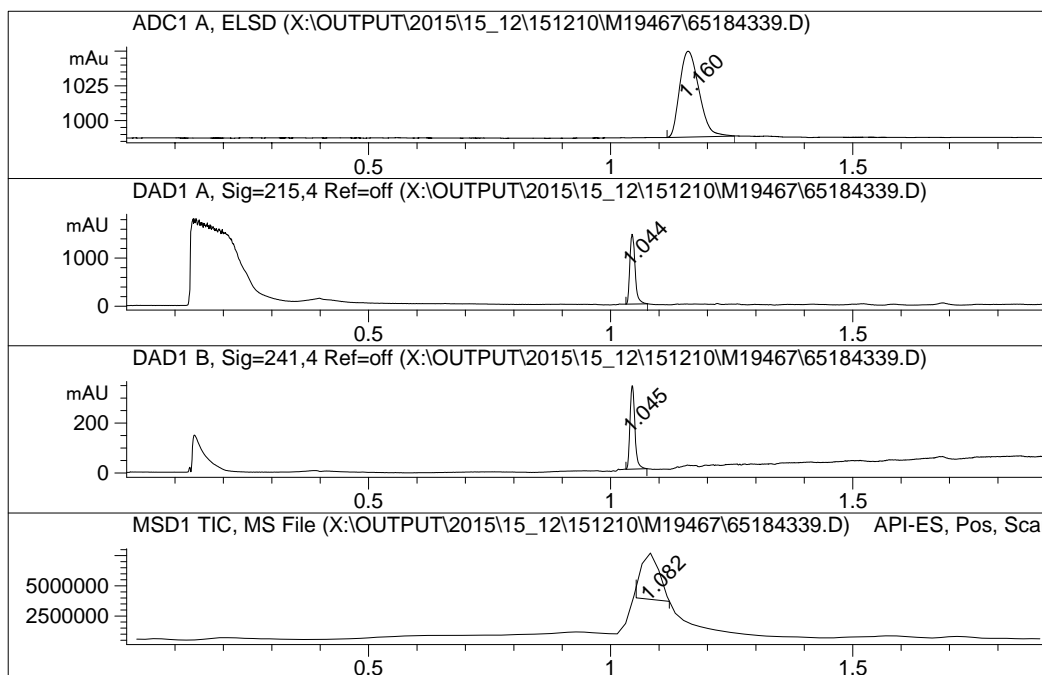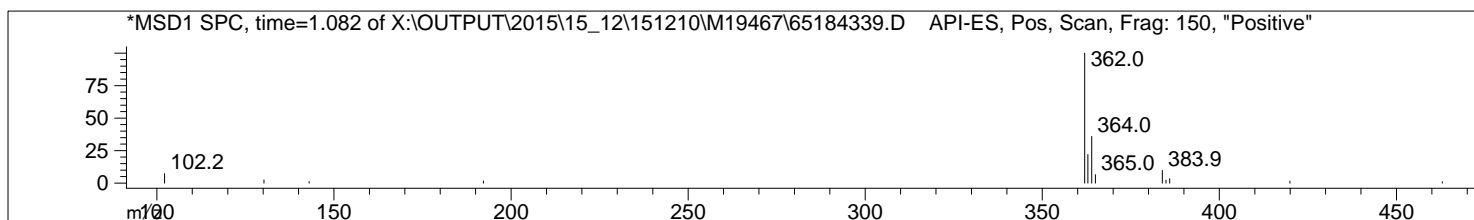

| # | Signal                    | R.Time | Area %  |
|---|---------------------------|--------|---------|
| 1 | ADC1 A, ELSD              | 1.160  | 100.000 |
| # | Signal                    | R.Time | Area %  |
| 1 | DAD1 A, Sig=215,4 Ref=off | 1.044  | 100.000 |
| # | Signal                    | R.Time | Area %  |
| 1 | DAD1 B, Sig=241,4 Ref=off | 1.045  | 100.000 |
| # | Signal                    | R.Time | Area %  |
| 1 | MSD1 TIC, MS File         | 1.082  | 100.000 |

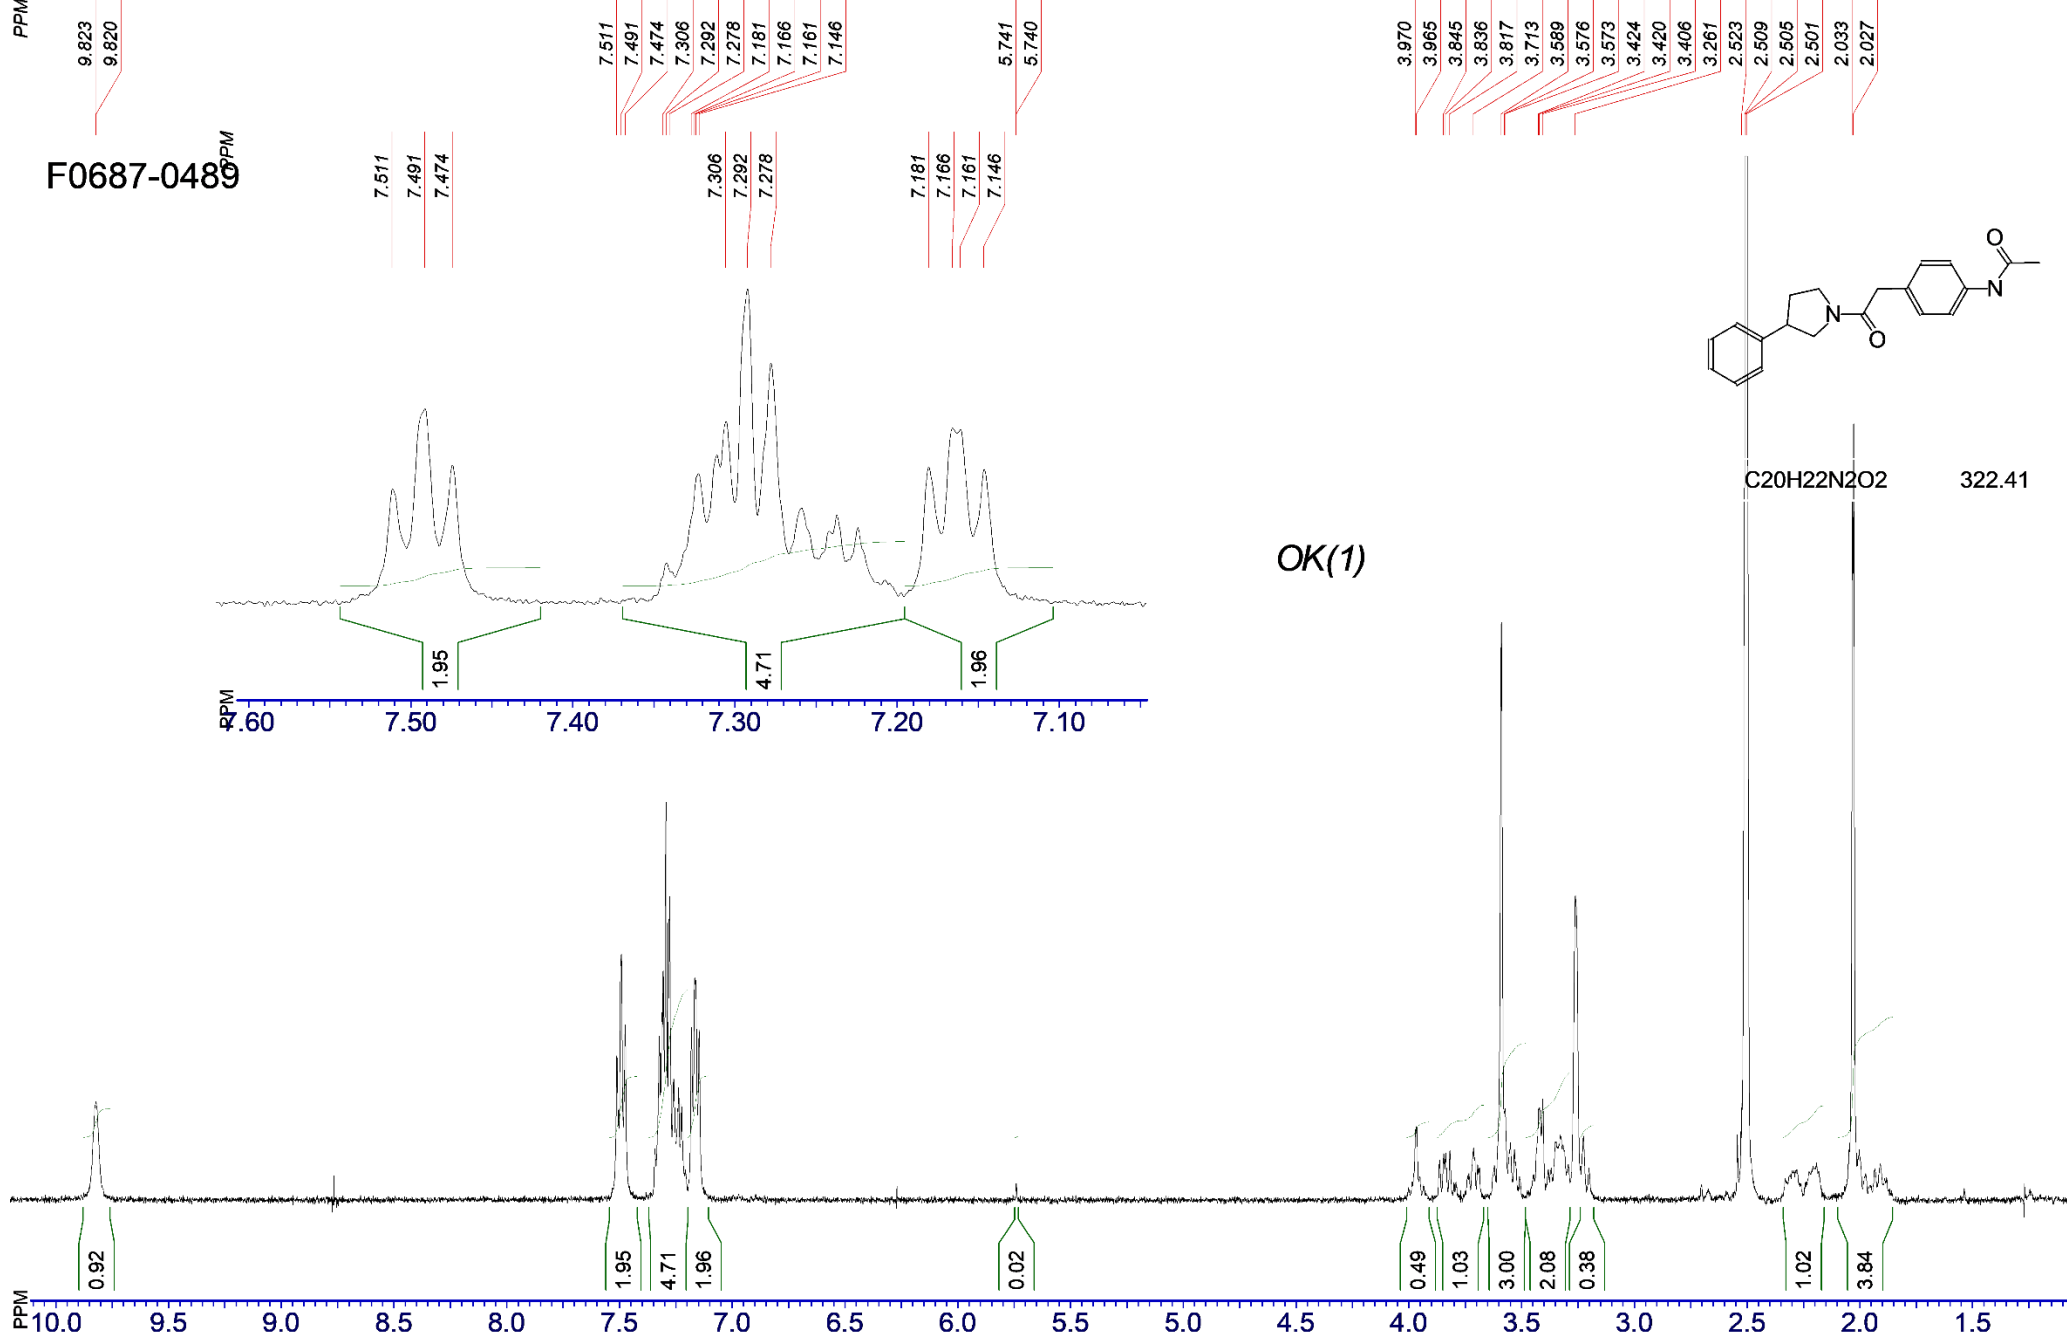

|                       |                    |                                             |                     |                      |
|-----------------------|--------------------|---------------------------------------------|---------------------|----------------------|
| File name: F0687-0489 | Expert: M.Pyanova  | SF: 400.0778 MHz; sw: 8000 Hz; at: 1.50 sec | NS: ; pw: 9,65 usec | SI: 65536, TD: 24000 |
| Date: 11_Dec_2015     | Solvent: DMSO 1207 |                                             | TE: 293 K           | block: S17655        |

-.o.-Syntez Purity Report -.o.-

Agilent 1100 LC/MSD SL  
 Diodearray G1315B (DAD1A-215nm; DAD1B-254nm)  
 Mass Quad G1956B (MSD1-Pos, MSD2-Neg)  
 ELSD Altech 3300 (ADC1 A, ELSD)

Mobile Phase:A-H<sub>2</sub>O+0.1%HCOOH;B-MeCN+0.1HCOOH  
 Separation colun **Non-informative**  
 Rapid Resolutionn HT Cartridge 4.6x30mm,  
 1.8-Micron, Zorbax SB C-18

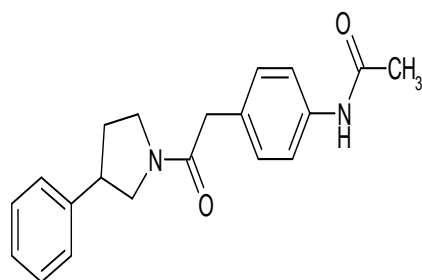

Mol.Weight: 322.41  
 Salt:

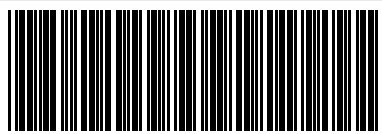

F0687-0489

M19493

-&gt;

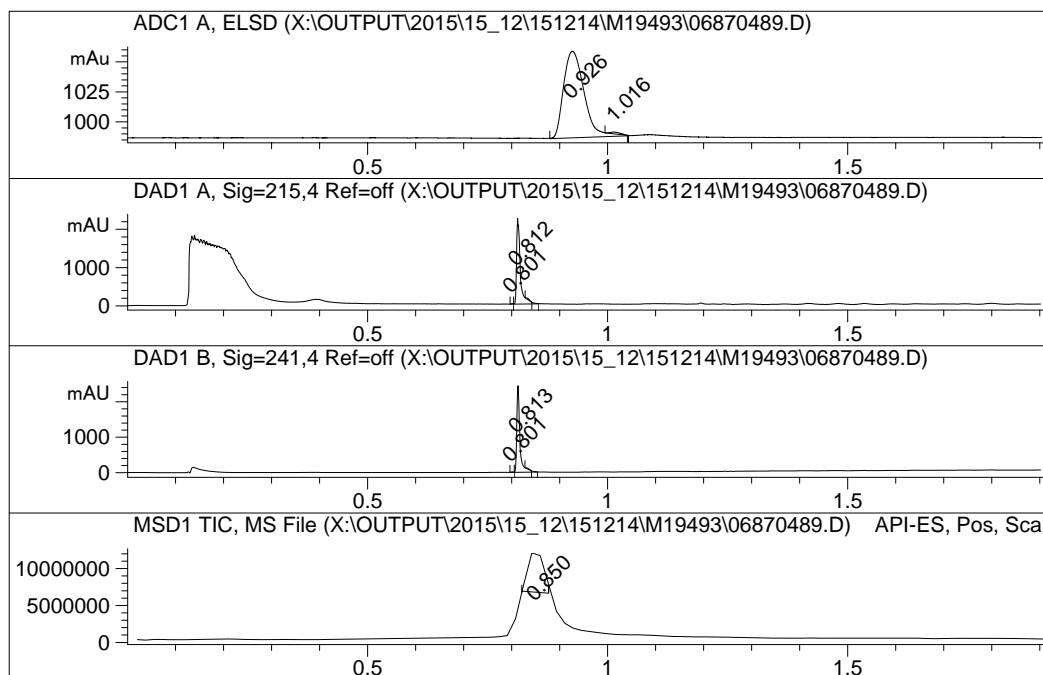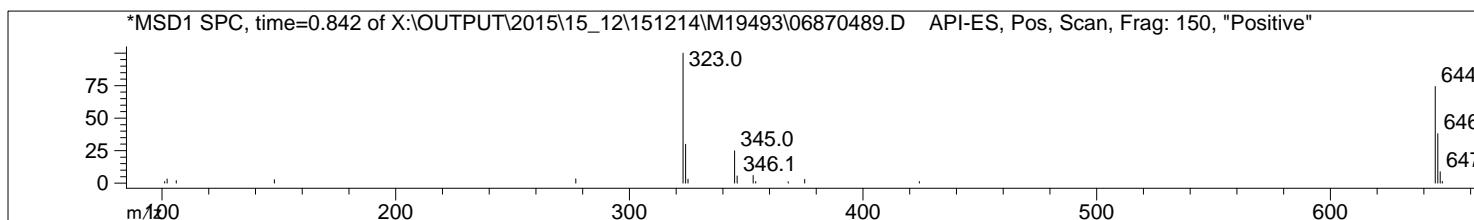

| # | Signal                    | R.Time | Area %  |
|---|---------------------------|--------|---------|
| 1 | ADC1 A, ELSD              | 0.926  | 98.943  |
| 2 |                           | 1.016  | 1.057   |
| # | Signal                    | R.Time | Area %  |
| 1 | DAD1 A, Sig=215,4 Ref=off | 0.801  | 0.306   |
| 2 |                           | 0.812  | 98.455  |
| 3 |                           | 0.834  | 1.239   |
| # | Signal                    | R.Time | Area %  |
| 1 | DAD1 B, Sig=241,4 Ref=off | 0.801  | 0.437   |
| 2 |                           | 0.813  | 98.722  |
| 3 |                           | 0.834  | 0.841   |
| # | Signal                    | R.Time | Area %  |
| 1 | MSD1 TIC, MS File         | 0.850  | 100.000 |

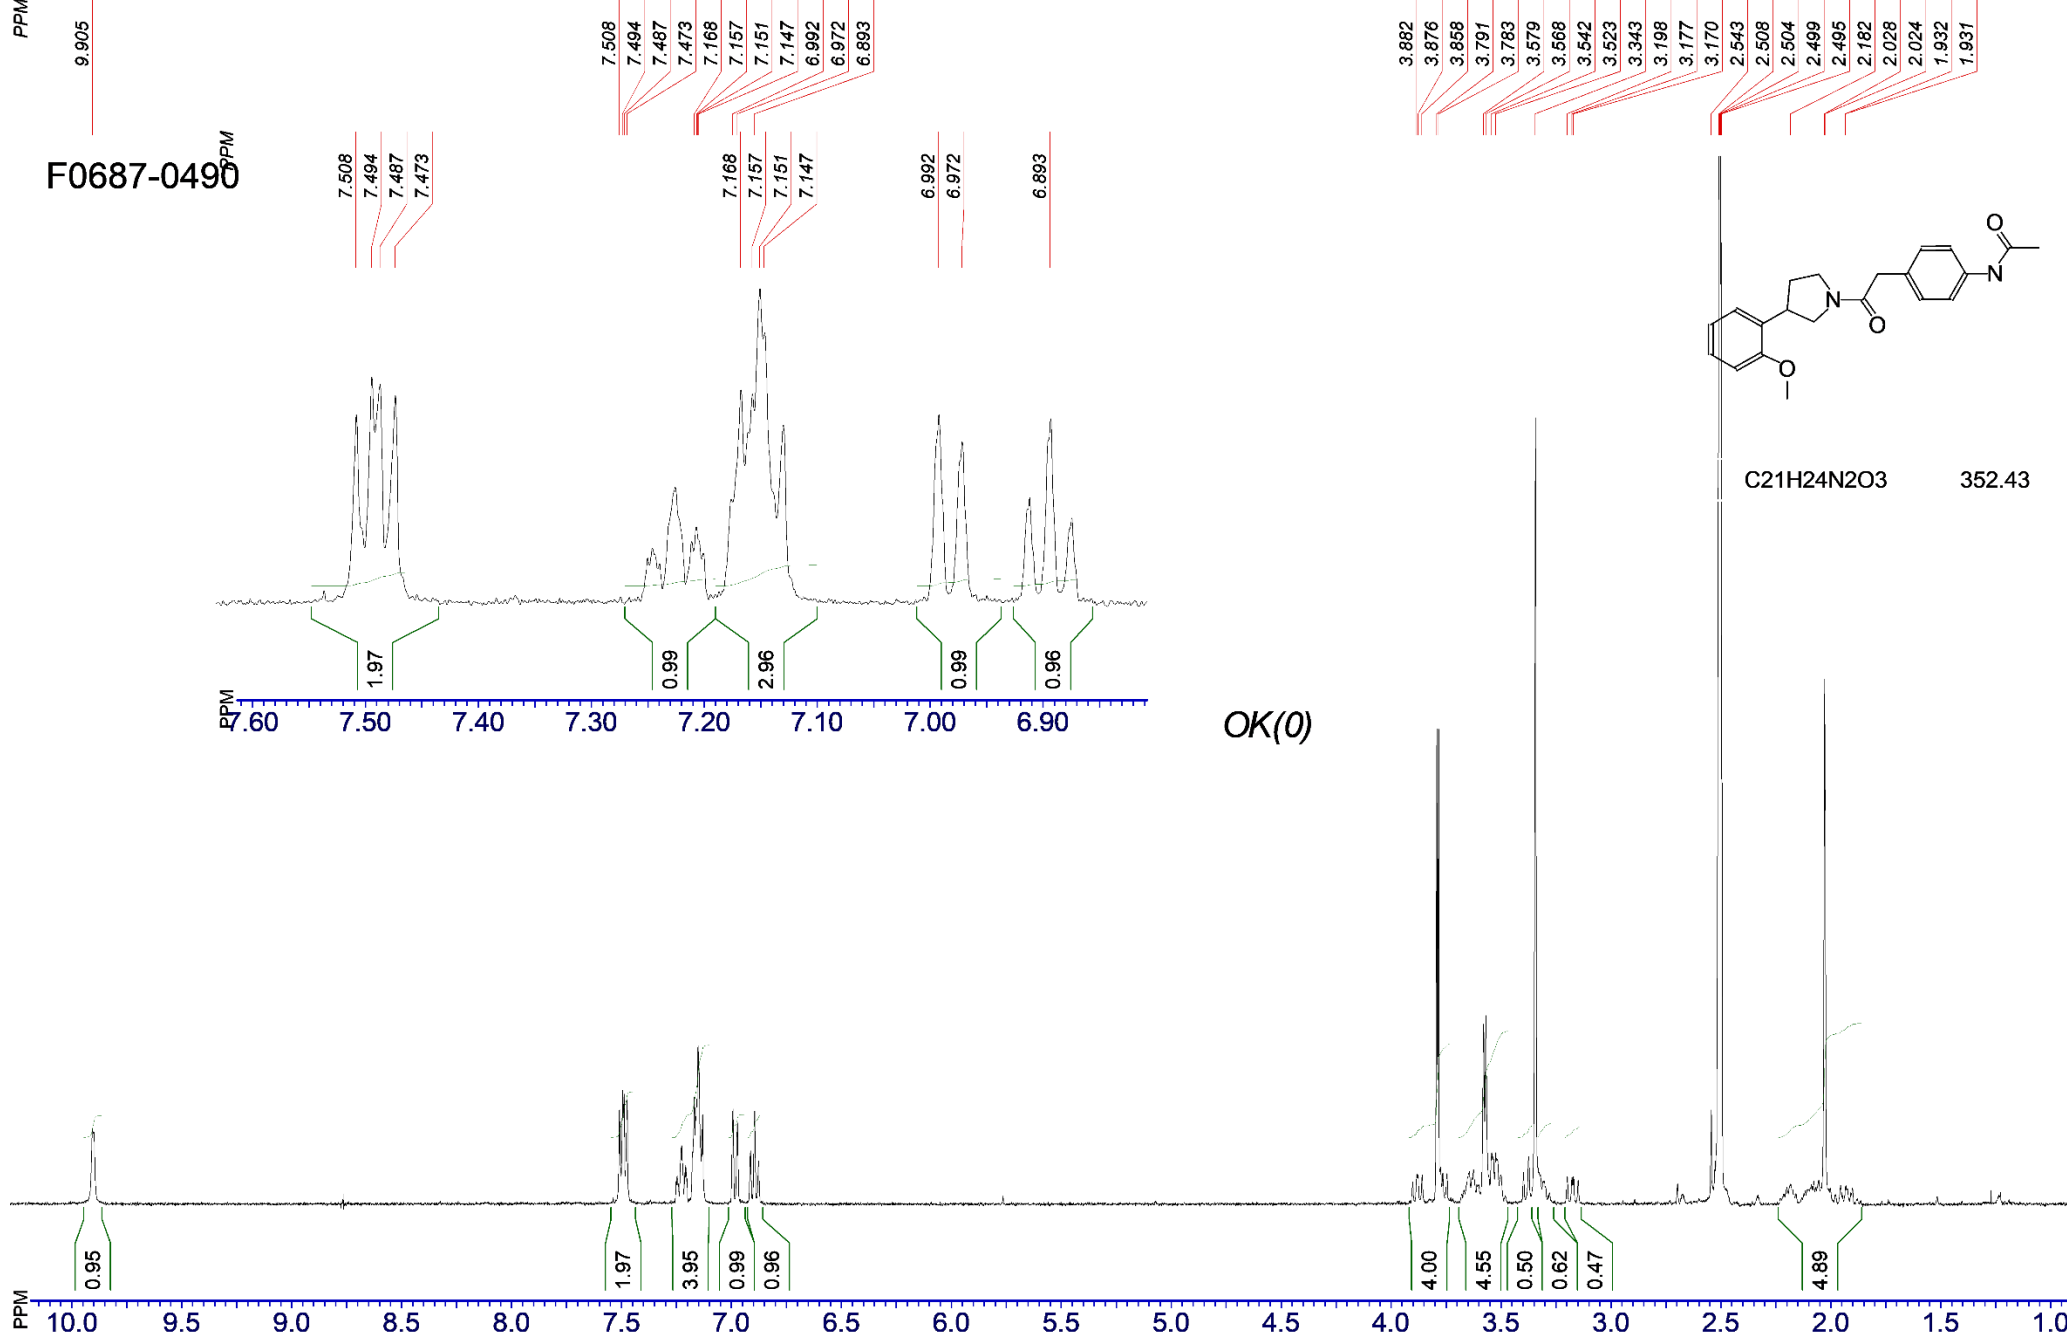

|                              |                    |                                             |                     |                      |
|------------------------------|--------------------|---------------------------------------------|---------------------|----------------------|
| File name: <b>F0687-0490</b> | Expert: M.Pyanova  | SF: 400.0778 MHz; sw: 8000 Hz; at: 1.50 sec | NS: ; pw: 9,65 usec | SI: 65536, TD: 24000 |
| Date: 11_Dec_2015            | Solvent: DMSO 1207 |                                             | TE: 293 K           | block: S17655        |

-.o.-Syntez Purity Report -.o.-

Agilent 1100 LC/MSD SL  
 Diodearray G1315B (DAD1A-215nm; DAD1B-254nm)  
 Mass Quad G1956B (MSD1-Pos, MSD2-Neg)  
 ELSD Altech 3300 (ADC1 A, ELSD)

Mobile Phase:A-H<sub>2</sub>O+0.1%HCOOH;B-MeCN+0.1HCOOH  
 Separation column **99%**  
 Rapid Resolutionn HT Cartridge 4.6x30mm,  
 1.8-Micron, Zorbax SB C-18

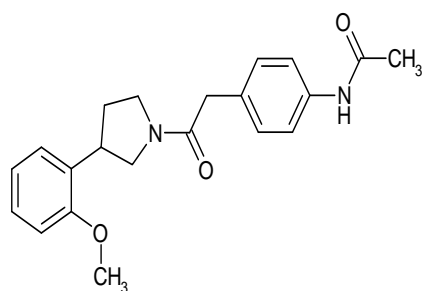

Mol.Weight: 352.43  
 Salt:

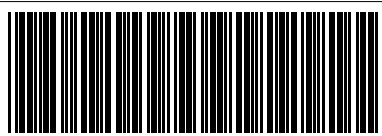

F0687-0490

M19493

-&gt;

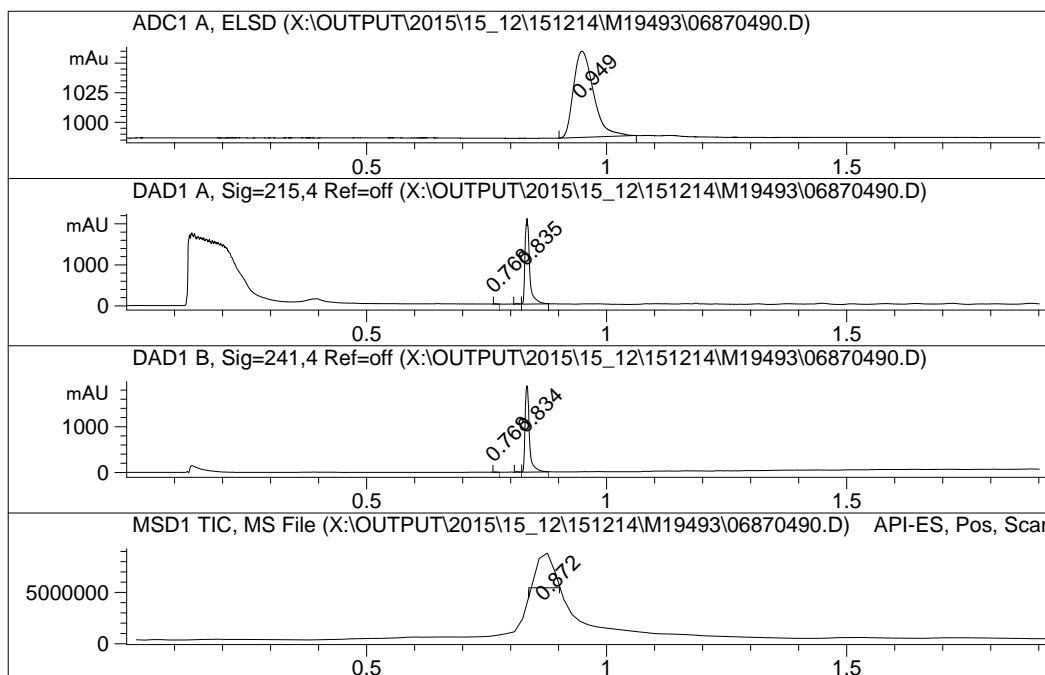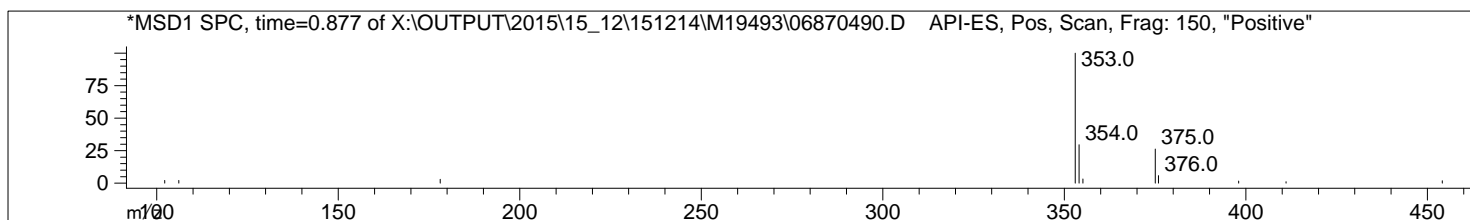

| # | Signal                    | R.Time | Area %  |
|---|---------------------------|--------|---------|
| 1 | ADC1 A, ELSD              | 0.949  | 100.000 |
| # | Signal                    | R.Time | Area %  |
| 1 | DAD1 A, Sig=215,4 Ref=off | 0.768  | 0.323   |
| 2 |                           | 0.813  | 0.625   |
| 3 |                           | 0.835  | 99.052  |
| # | Signal                    | R.Time | Area %  |
| 1 | DAD1 B, Sig=241,4 Ref=off | 0.768  | 0.285   |
| 2 |                           | 0.813  | 0.521   |
| 3 |                           | 0.834  | 99.194  |
| # | Signal                    | R.Time | Area %  |
| 1 | MSD1 TIC, MS File         | 0.872  | 100.000 |

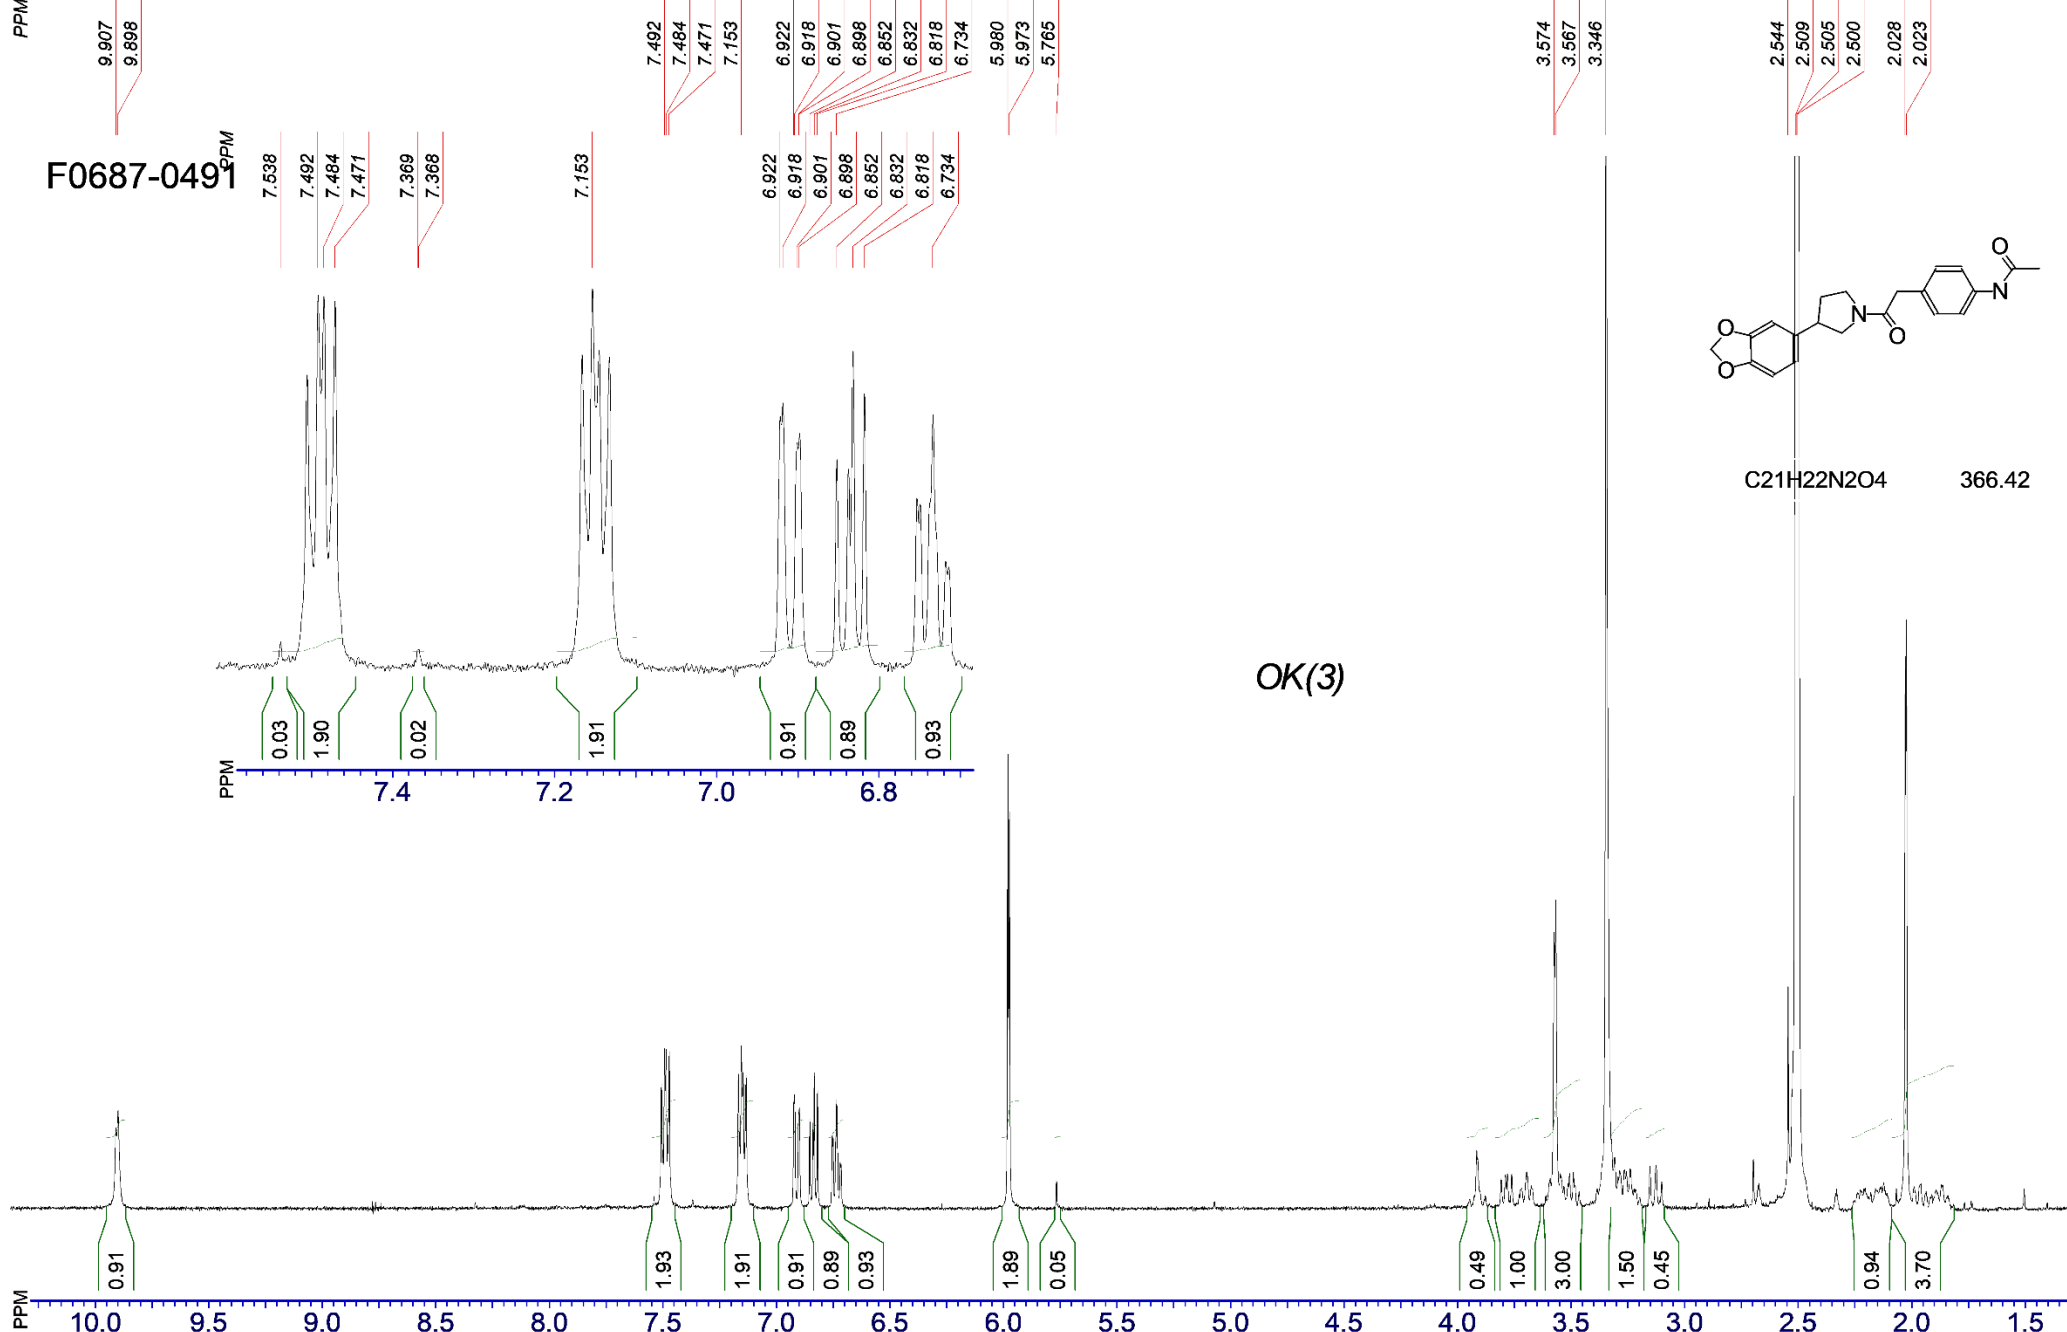

|                              |                    |                                             |                     |                      |
|------------------------------|--------------------|---------------------------------------------|---------------------|----------------------|
| File name: <b>F0687-0491</b> | Expert: M.Pyanova  | SF: 400.0778 MHz; sw: 8000 Hz; at: 1.50 sec | NS: ; pw: 9,65 usec | SI: 65536, TD: 24000 |
| Date: 11_Dec_2015            | Solvent: DMSO 1207 |                                             | TE: 293 K           | block: S17655        |



-.o.-Syntez Purity Report -.o.-

Agilent 1100 LC/MSD SL  
 Diodearray G1315B (DAD1A-215nm; DAD1B-254nm)  
 Mass Quad G1956B (MSD1-Pos, MSD2-Neg)  
 ELSD Altech 3300 (ADC1 A, ELSD)

Mobile Phase:A-H<sub>2</sub>O+0.1%HCOOH;B-MeCN+0.1HCOOH  
 Separation colu **100 %**  
 Rapid Resolutionn HT Cartridge 4.6x30mm,  
 1.8-Micron, Zorbax SB C-18

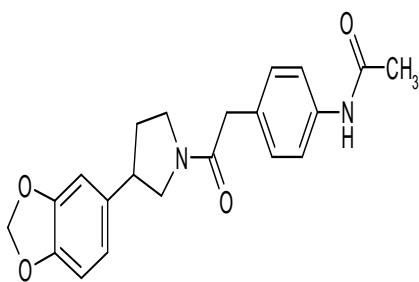

Mol.Weight: 366.41  
 Salt:

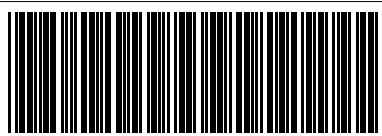

F0687-0491

M19493

-&gt;

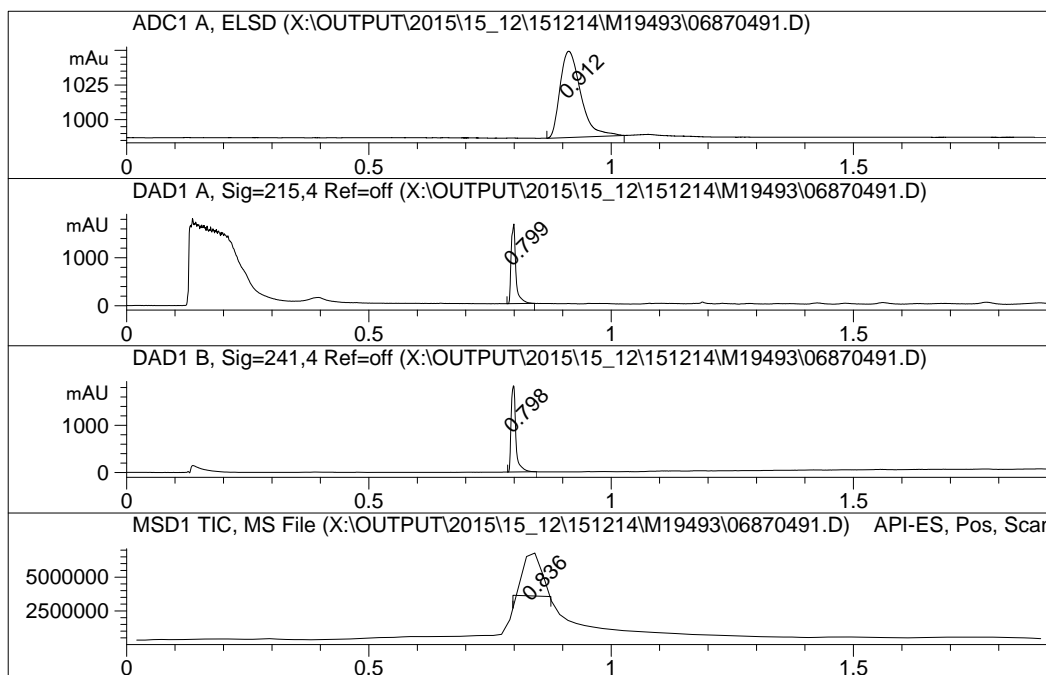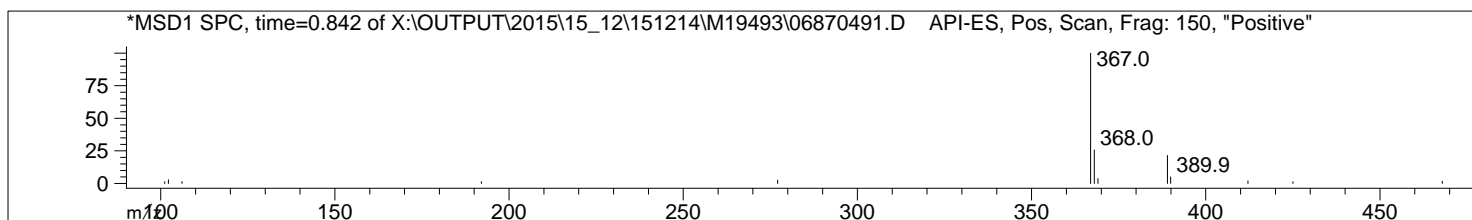

| # | Signal                    | R.Time | Area %  |
|---|---------------------------|--------|---------|
| 1 | ADC1 A, ELSD              | 0.912  | 100.000 |
| # | Signal                    | R.Time | Area %  |
| 1 | DAD1 A, Sig=215,4 Ref=off | 0.799  | 100.000 |
| # | Signal                    | R.Time | Area %  |
| 1 | DAD1 B, Sig=241,4 Ref=off | 0.798  | 100.000 |
| # | Signal                    | R.Time | Area %  |
| 1 | MSD1 TIC, MS File         | 0.836  | 100.000 |

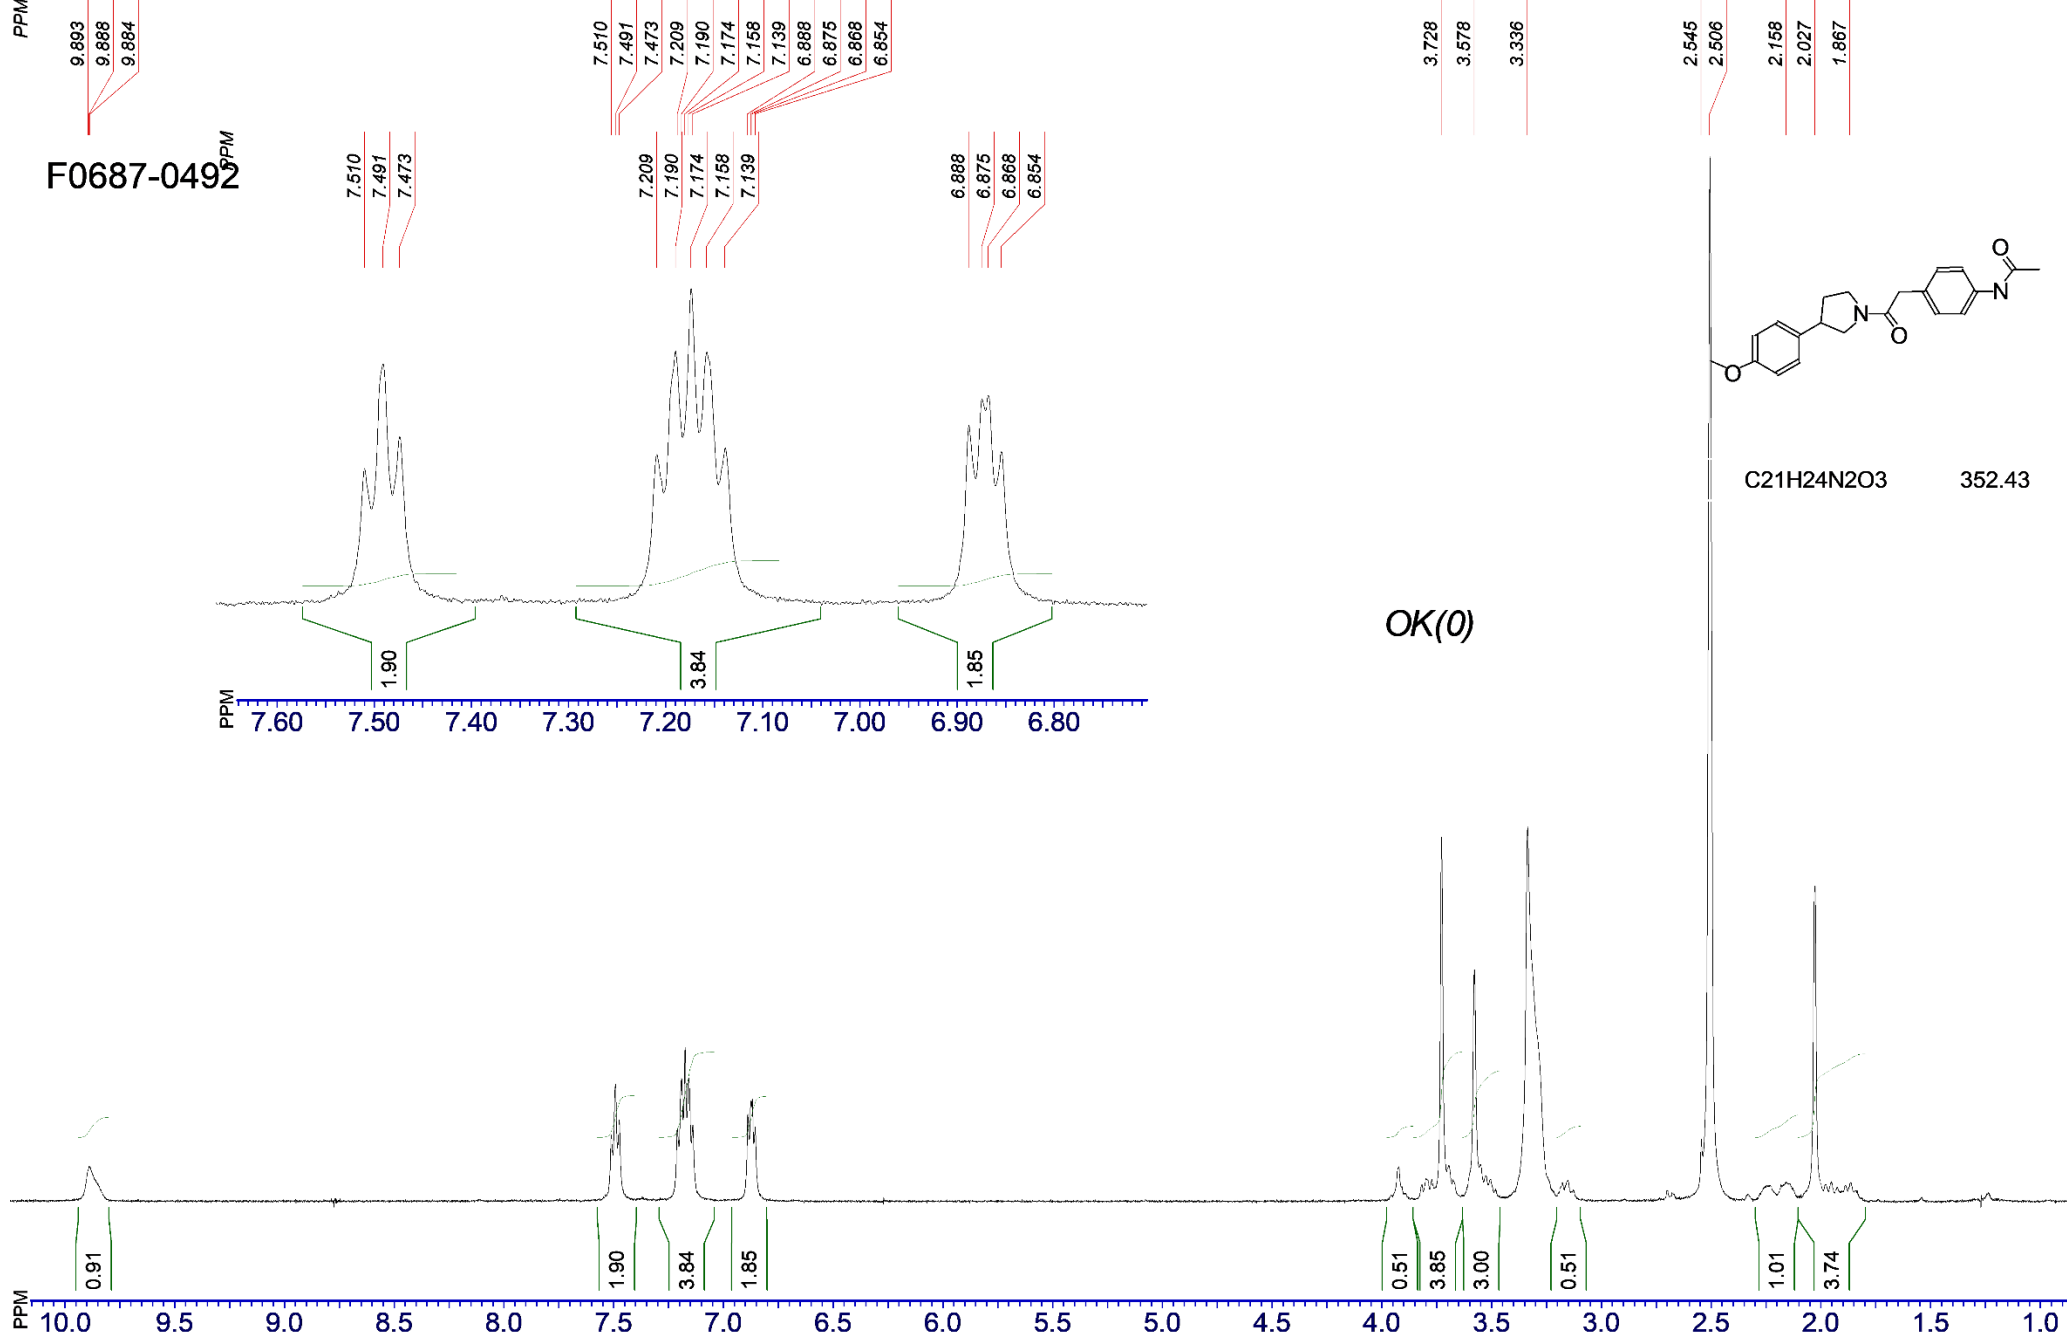

|                       |                    |                                             |                     |                      |
|-----------------------|--------------------|---------------------------------------------|---------------------|----------------------|
| File name: F0687-0492 | Expert: M.Pyanova  | SF: 400.0778 MHz; sw: 8000 Hz; at: 1.50 sec | NS: ; pw: 9,65 usec | SI: 65536, TD: 24000 |
| Date: 11_Dec_2015     | Solvent: DMSO 1207 |                                             | TE: 293 K           | block: S17655        |

-.o.-Syntez Purity Report -.o.-

Agilent 1100 LC/MSD SL  
 Diodearray G1315B (DAD1A-215nm; DAD1B-254nm)  
 Mass Quad G1956B (MSD1-Pos, MSD2-Neg)  
 ELSD Altech 3300 (ADC1 A, ELSD)

Mobile Phase:A-H2O+0.1%HCOOH;B-MeCN+0.1HCOOH  
 Separation col **Non-informative**  
 Rapid Resolutionn HT Cartridge 4.6x30mm,  
 1.8-Micron, Zorbax SB C-18

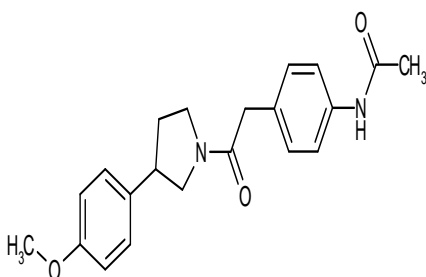

Mol.Weight: 352.43  
 Salt:

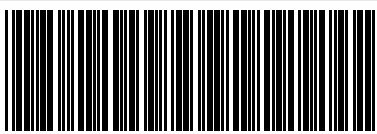

F0687-0492

M19493

-&gt;

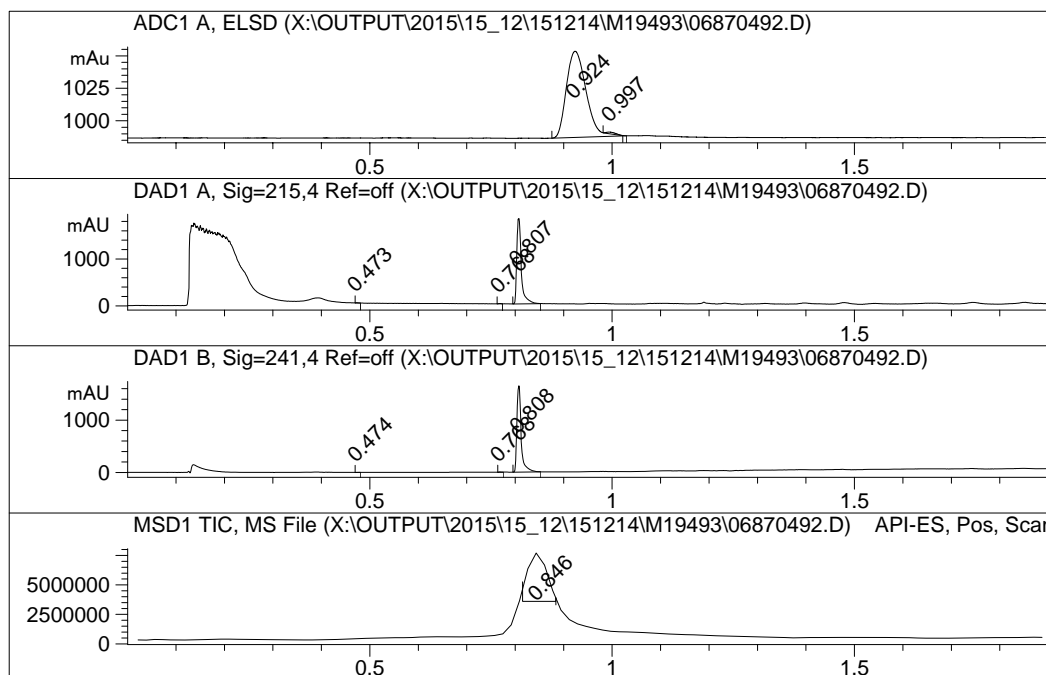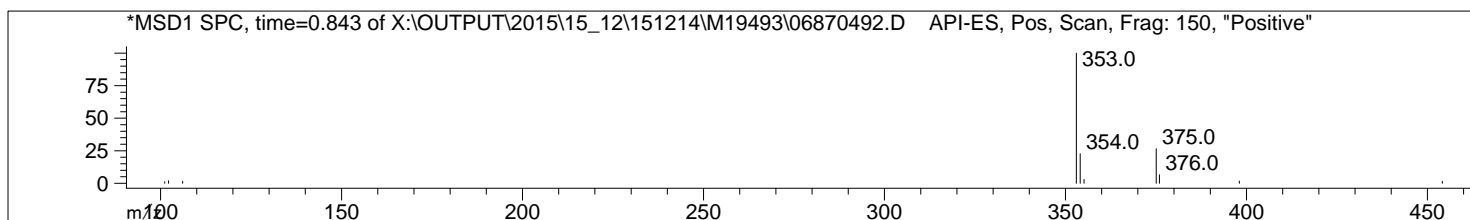

| # | Signal                    | R.Time | Area %  |
|---|---------------------------|--------|---------|
| 1 | ADC1 A, ELSD              | 0.924  | 99.038  |
| 2 |                           | 0.997  | 0.962   |
| # | Signal                    | R.Time | Area %  |
| 1 | DAD1 A, Sig=215,4 Ref=off | 0.473  | 0.275   |
| 2 |                           | 0.768  | 0.172   |
| 3 |                           | 0.807  | 99.554  |
| # | Signal                    | R.Time | Area %  |
| 1 | DAD1 B, Sig=241,4 Ref=off | 0.474  | 0.107   |
| 2 |                           | 0.768  | 0.250   |
| 3 |                           | 0.808  | 99.643  |
| # | Signal                    | R.Time | Area %  |
| 1 | MSD1 TIC, MS File         | 0.846  | 100.000 |

PPM

F0687-0494

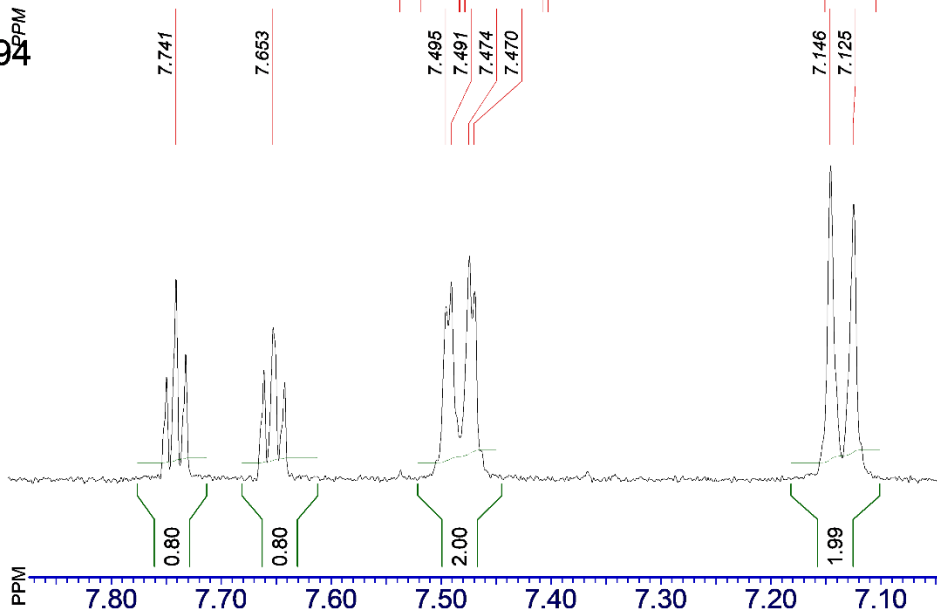

3.999  
3.974  
3.970  
3.908  
3.826  
3.820  
3.804  
3.689  
3.671  
3.664  
3.585  
3.576  
3.529  
3.341  
2.543  
2.508  
2.504  
2.499  
2.326  
2.179  
2.025

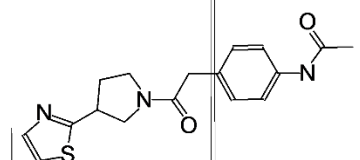

C<sub>17</sub>H<sub>19</sub>N<sub>3</sub>O<sub>2</sub>S 329.42

OK(5)

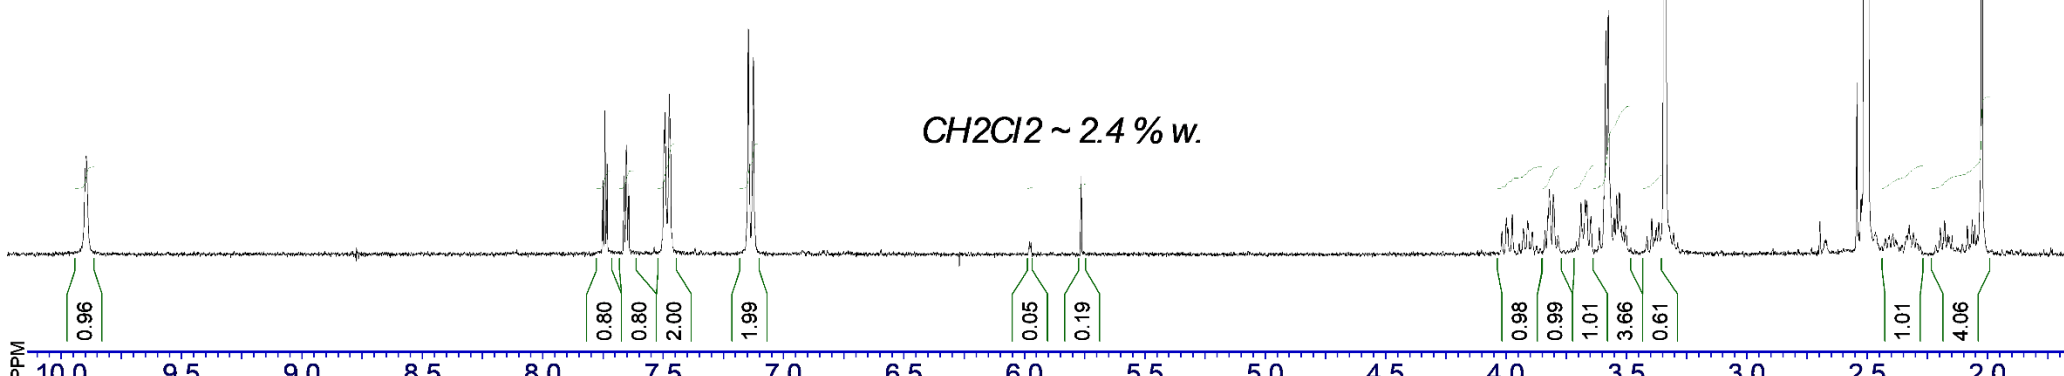

|                       |                    |                                             |                     |                      |
|-----------------------|--------------------|---------------------------------------------|---------------------|----------------------|
| File name: F0687-0494 | Expert: M.Pyanova  | SF: 400.0778 MHz; sw: 8000 Hz; at: 1.50 sec | NS: ; pw: 9,65 usec | SI: 65536, TD: 24000 |
| Date: 11_Dec_2015     | Solvent: DMSO 1207 |                                             | TE: 293 K           | block: S17655        |

-.o.-Syntez Purity Report -.o.-

Agilent 1100 LC/MSD SL  
 Diodearray G1315B (DAD1A-215nm; DAD1B-254nm)  
 Mass Quad G1956B (MSD1-Pos, MSD2-Neg)  
 ELSD Altech 3300 (ADC1 A, ELSD)

Mobile Phase:A-H<sub>2</sub>O+0.1%HCOOH;B-MeCN+0.1HCOOH  
 Separation column **96 %**  
 Rapid Resolutionn HT Cartridge 4.6x30mm,  
 1.8-Micron, Zorbax SB C-18

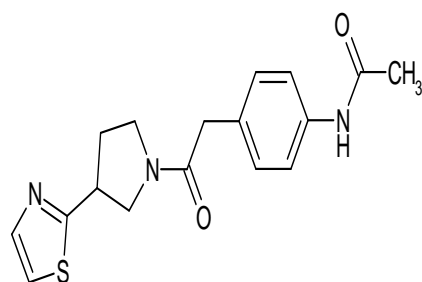

Mol.Weight: 329.42  
 Salt:

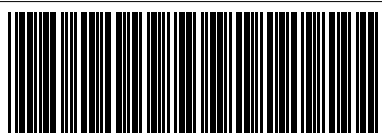

F0687-0494

M19493

-&gt;

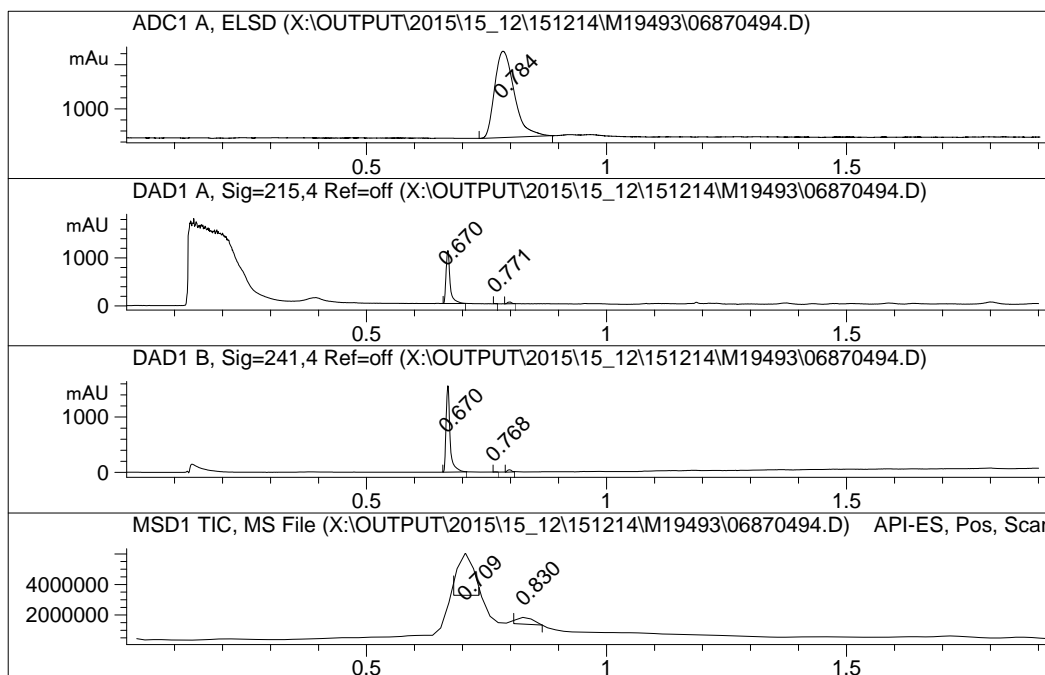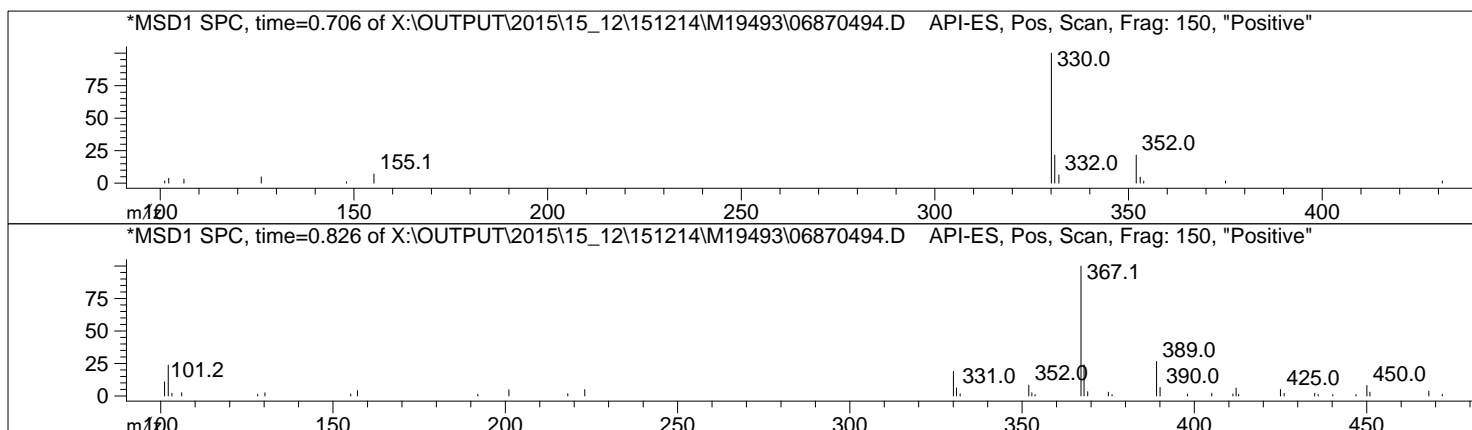

| # | Signal                    | R.Time | Area %  |
|---|---------------------------|--------|---------|
| 1 | ADC1 A, ELSD              | 0.784  | 100.000 |
| # | Signal                    | R.Time | Area %  |
| 1 | DAD1 A, Sig=215,4 Ref=off | 0.670  | 96.275  |
| 2 |                           | 0.771  | 0.298   |
| 3 |                           | 0.798  | 3.427   |
| # | Signal                    | R.Time | Area %  |
| 1 | DAD1 B, Sig=241,4 Ref=off | 0.670  | 97.226  |
| 2 |                           | 0.768  | 0.129   |
| 3 |                           | 0.799  | 2.645   |
| # | Signal                    | R.Time | Area %  |
| 1 | MSD1 TIC, MS File         | 0.709  | 88.151  |
| 2 |                           | 0.830  | 11.849  |

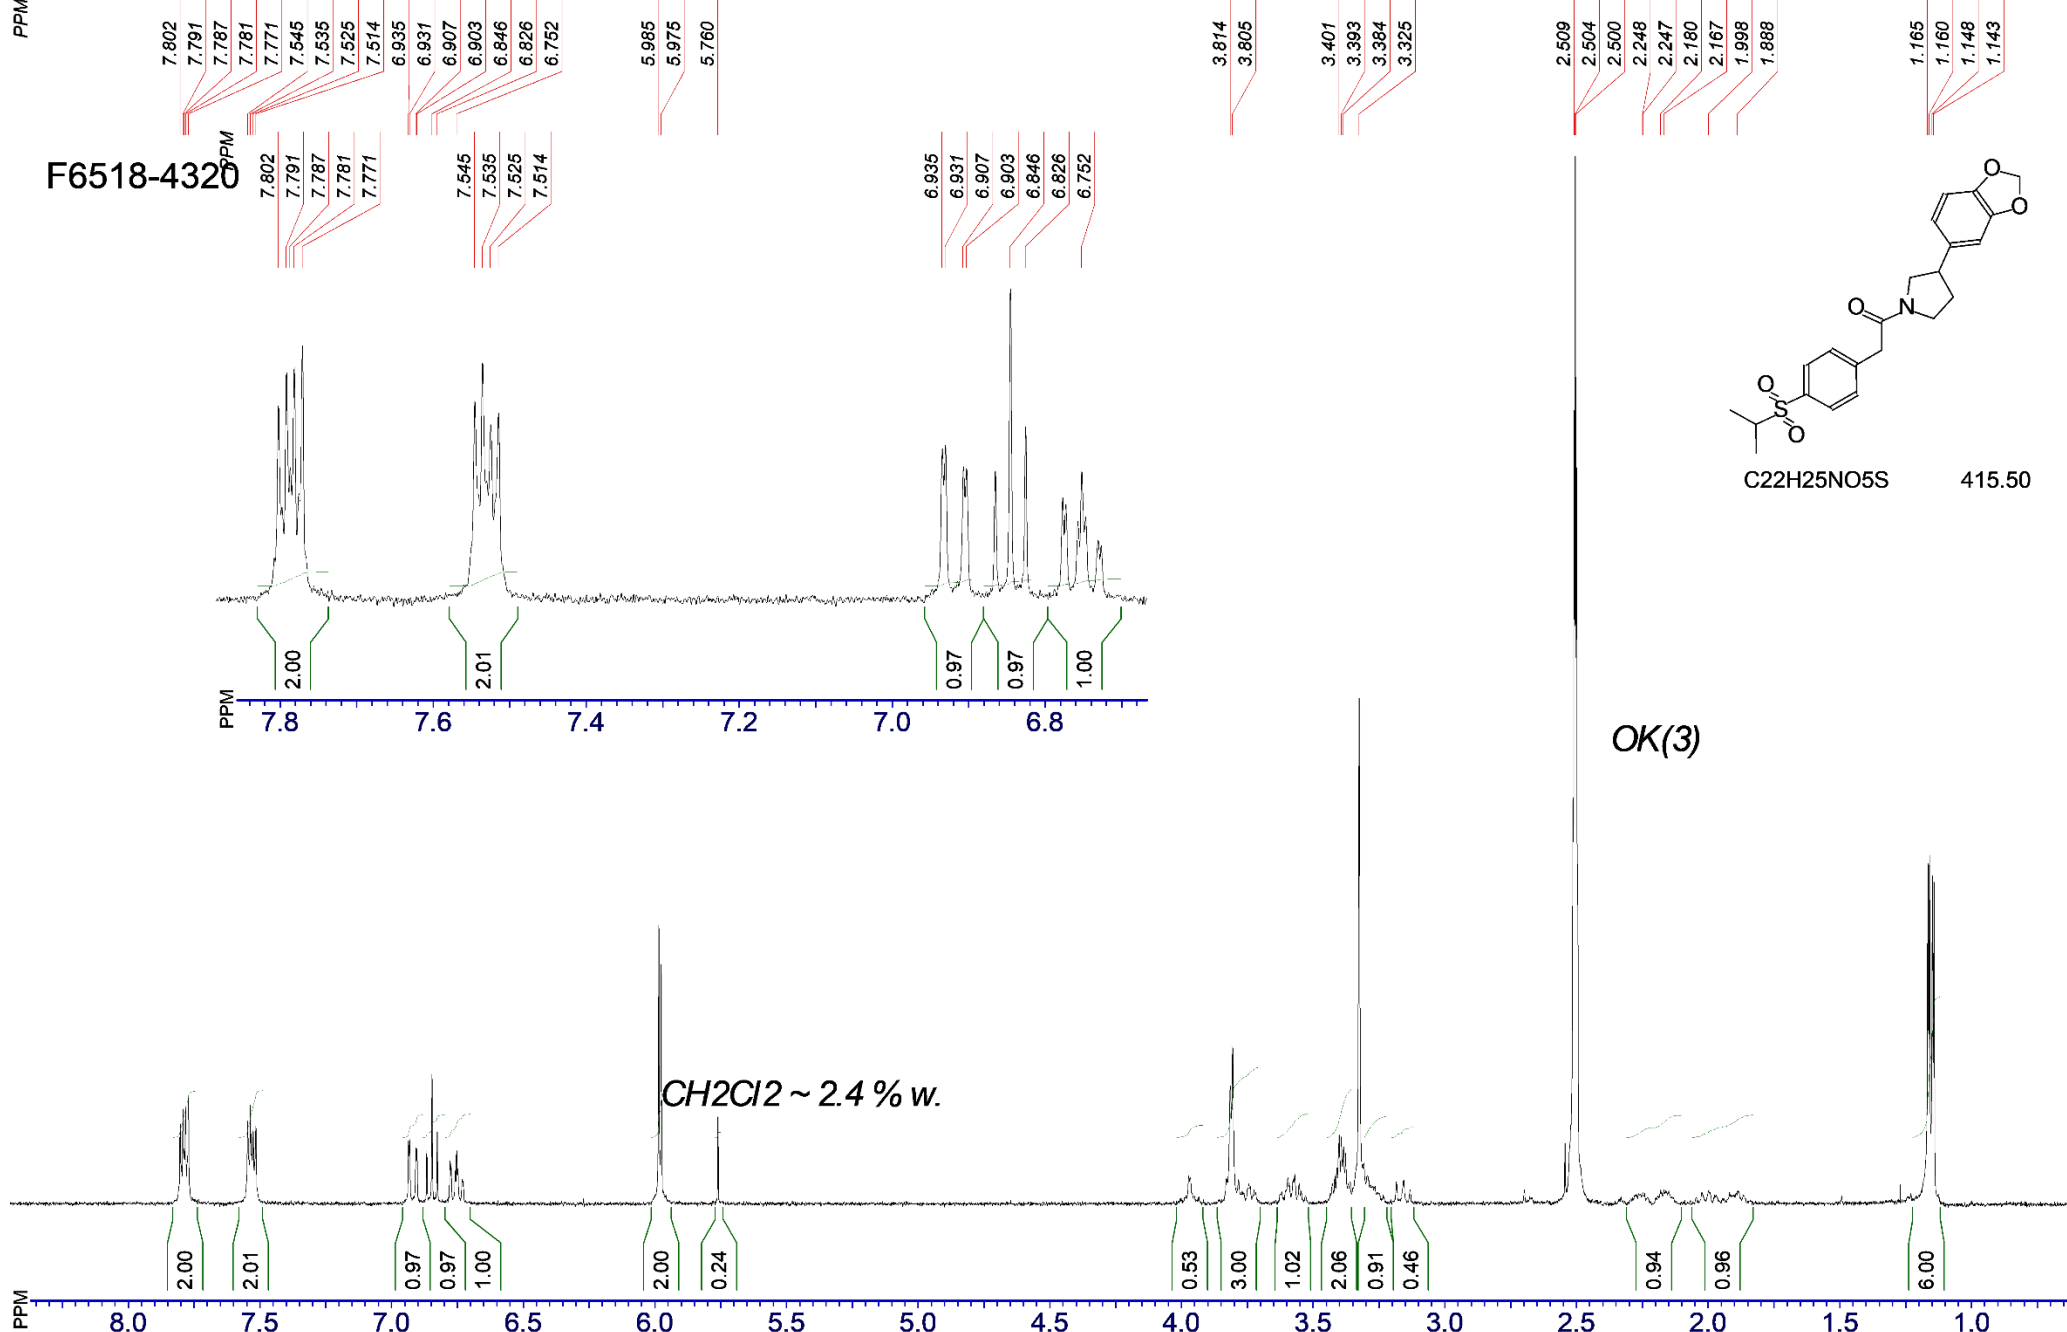

|                       |                    |                                             |                     |                      |
|-----------------------|--------------------|---------------------------------------------|---------------------|----------------------|
| File name: F6518-4320 | Expert: M.Pyanova  | SF: 400.0778 MHz; sw: 8000 Hz; at: 1.50 sec | NS: ; pw: 9,65 usec | SI: 65536, TD: 24000 |
| Date: 11_Dec_2015     | Solvent: DMSO 1207 |                                             | TE: 293 K           | block: S17655        |

-.o.-Syntez Purity Report -.o.-

Agilent 1100 LC/MSD SL  
 Diodearray G1315B (DAD1A-215nm; DAD1B-254nm)  
 Mass Quad G1956B (MSD1-Pos, MSD2-Neg)  
 ELSD Altech 3300 (ADC1 A, ELSD)

Mobile Phase:A-H<sub>2</sub>O+0.1%HCOOH;B-MeCN+0.1HCOOH  
 Separation column:  
 Rapid Resolutionn HPLC Cartridge 4.6x300mm,  
 1.8-Micron, Zorbax SB C-18

**99 %**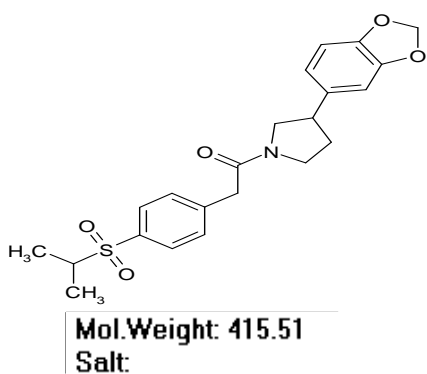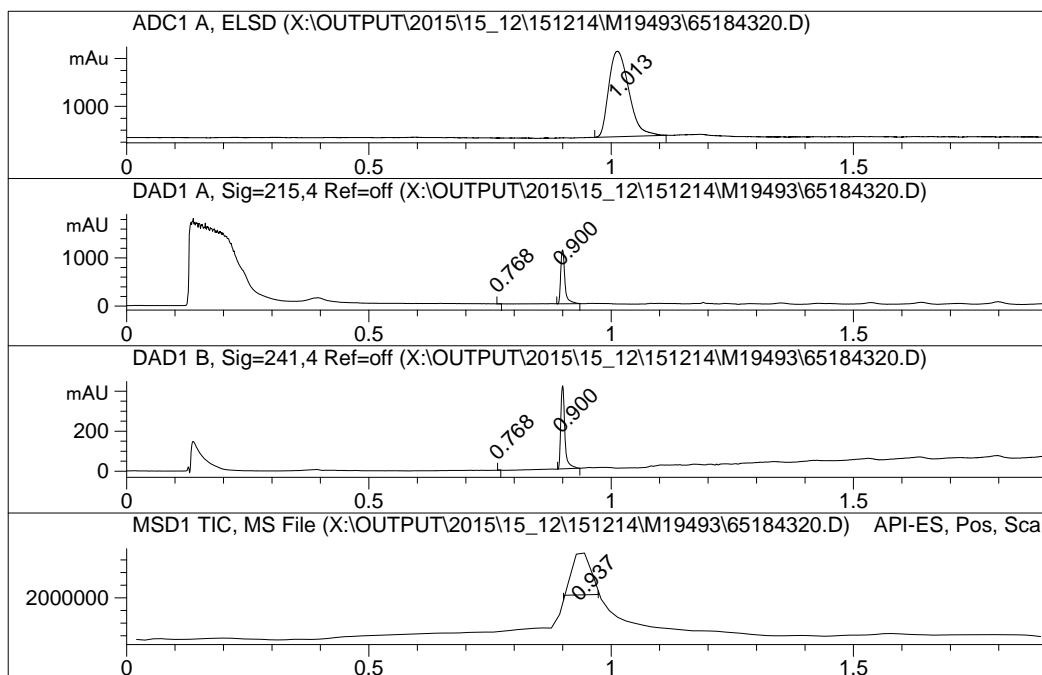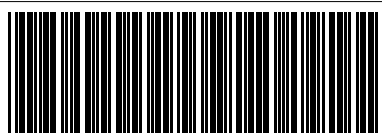**F6518-4320**

M19493

-&gt;

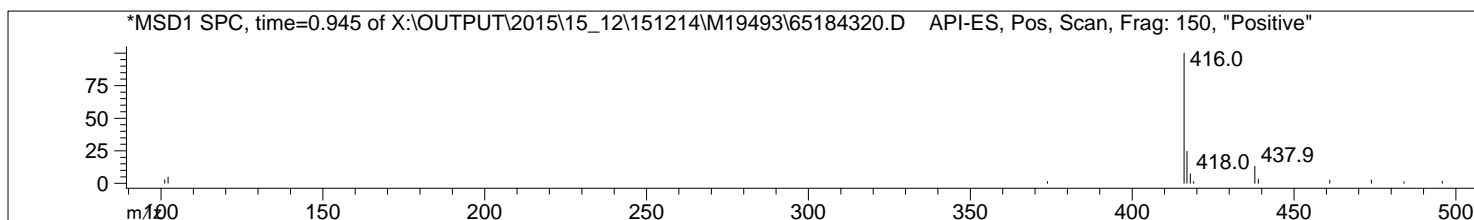

| # | Signal                    | R.Time | Area %  |
|---|---------------------------|--------|---------|
| 1 | ADC1 A, ELSD              | 1.013  | 100.000 |
| # | Signal                    | R.Time | Area %  |
| 1 | DAD1 A, Sig=215,4 Ref=off | 0.768  | 0.334   |
| 2 |                           | 0.900  | 99.666  |
| # | Signal                    | R.Time | Area %  |
| 1 | DAD1 B, Sig=241,4 Ref=off | 0.768  | 0.252   |
| 2 |                           | 0.900  | 99.748  |
| # | Signal                    | R.Time | Area %  |
| 1 | MSD1 TIC, MS File         | 0.937  | 100.000 |

PPM

F0687-0468

10.642

PPM

8.599  
8.594

8.154  
8.116  
8.084

8.154  
8.116  
8.084

7.452  
7.361  
7.355  
7.347

7.339  
7.330  
7.324  
7.095

7.452  
7.361  
7.355  
7.347  
7.339  
7.330  
7.324  
7.095

4.226  
4.207  
4.203  
4.201  
4.182  
3.955  
3.931  
3.723  
3.717  
3.699  
3.566  
3.326

2.502

2.112  
2.099

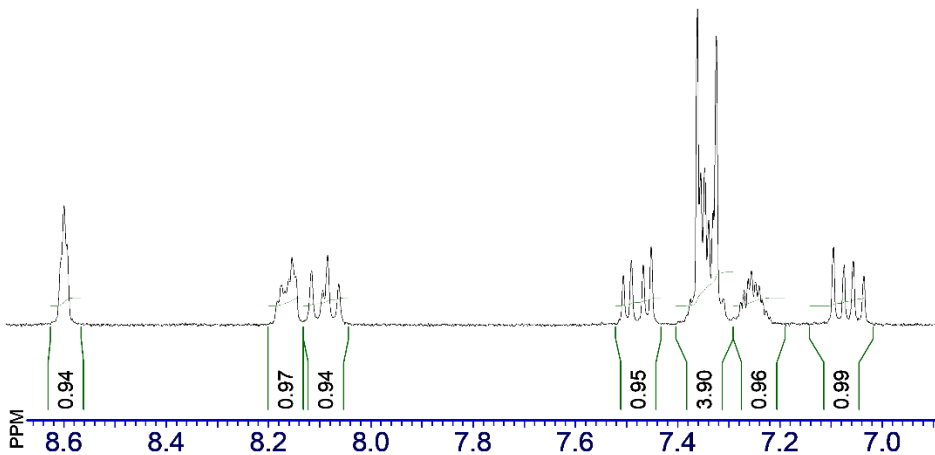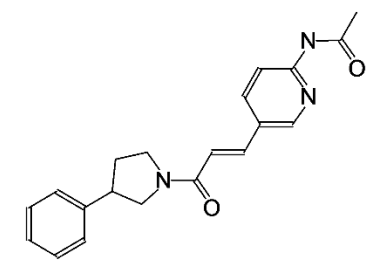

0 0 C20H21N3O2  
335.40

OK(0)

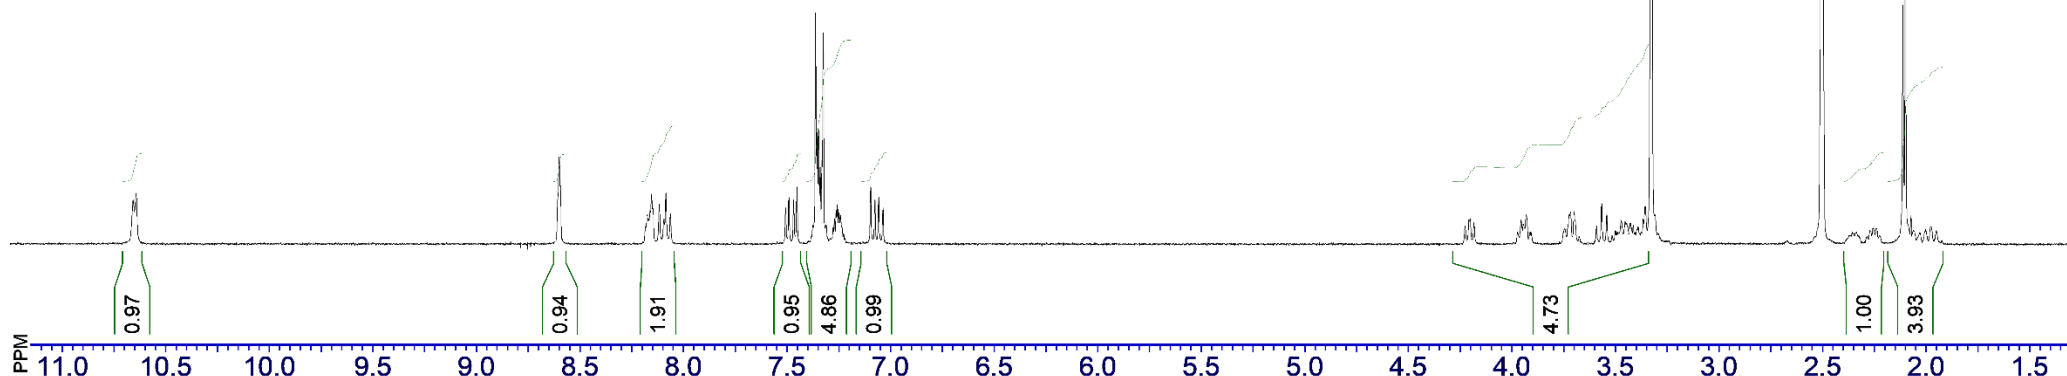

|                       |                   |                                             |                     |                      |
|-----------------------|-------------------|---------------------------------------------|---------------------|----------------------|
| File name: F0687-0468 | Expert: M.Pyanova | SF: 400.0778 MHz; sw: 8000 Hz; at: 1.50 sec | NS: ; pw: 9,65 usec | SI: 65536, TD: 24000 |
| Date: 29_Oct_2015     | Solvent: DMSO new |                                             | TE: 293 K           | block: S17188        |



- .o.- Syntez Purity Report - .o.-

Agilent 1200 LC/MSD  
 Diodearray G1315B (DAD1A-215nm; DAD1B-240nm)  
 Mass Quad G6140A (MSD1-Pos, MSD2-Neg)  
 ELSD Altech 3300 (ADC1 A, ELSD)

Mobile Phase: A-H<sub>2</sub>O+0.1HCOOH; B-MeCN+0.1HCOOH  
 Separation column **100 %**  
 Rapid Resolutionn HT Cartige 4.6x30mm,  
 1.8-Micron, Zorbax SB-C18

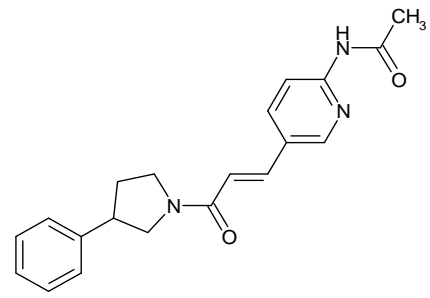

Mol.Weight: 335.4  
 Salt:

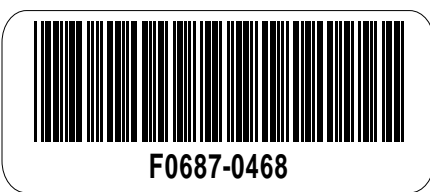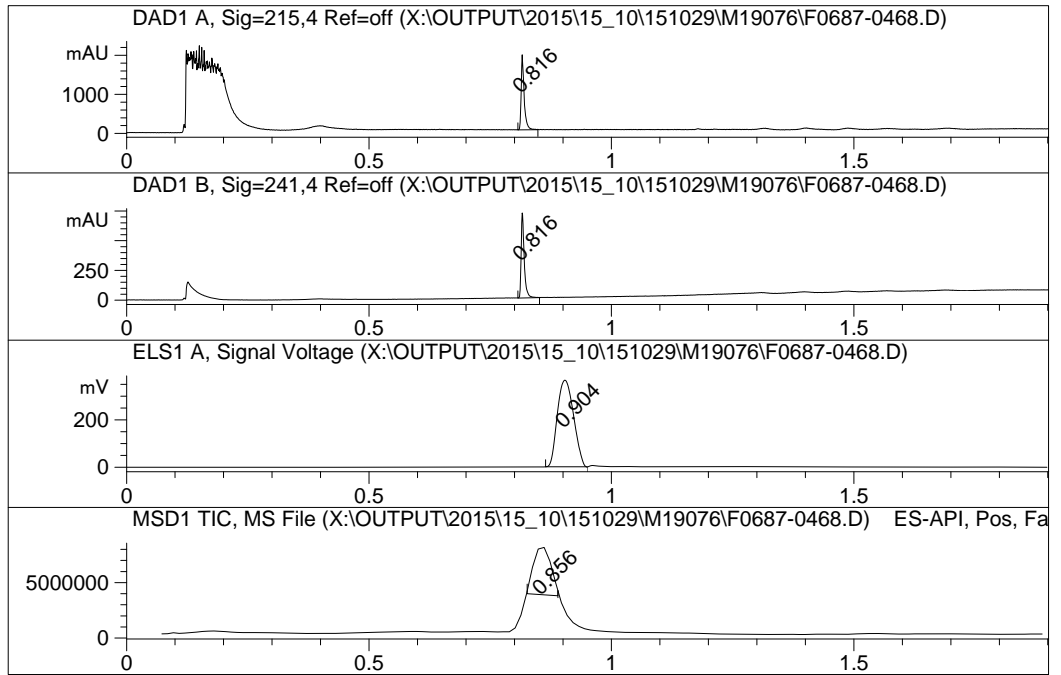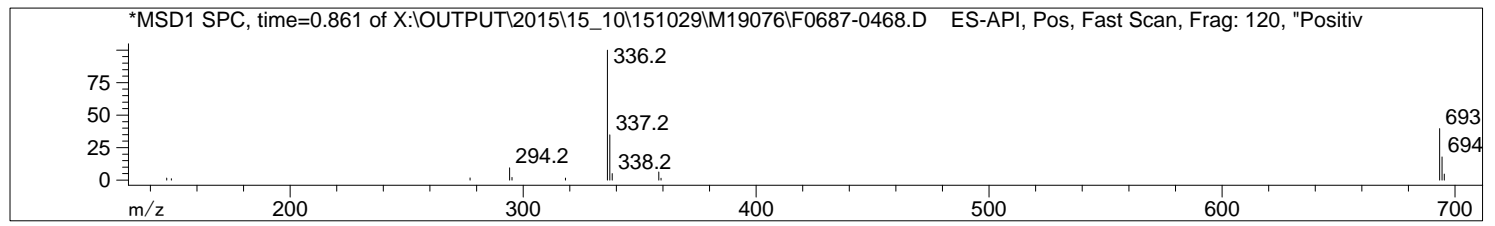

| # | Signal                    | R.Time | Area %  |
|---|---------------------------|--------|---------|
| 1 | DAD1 A, Sig=215,4 Ref=off | 0.816  | 100.000 |
| 1 | DAD1 B, Sig=241,4 Ref=off | 0.816  | 100.000 |
| 1 | ELS1 A, Signal Voltage    | 0.904  | 100.000 |
| 1 | MSD1 TIC, MS File         | 0.856  | 100.000 |

PPM

F0687-0471-uns

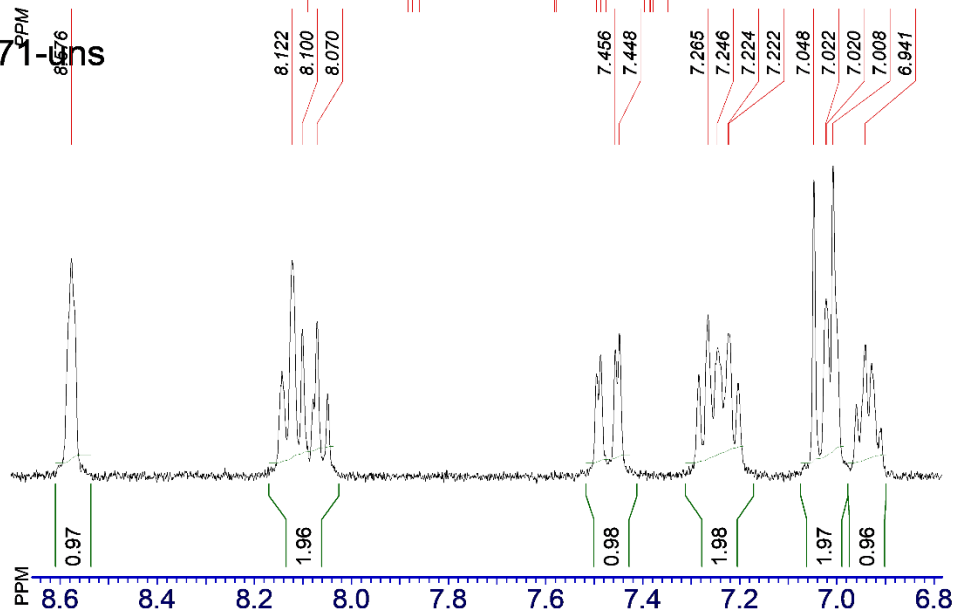

UNS

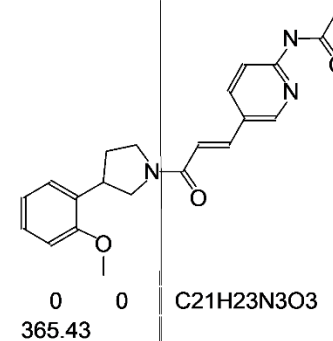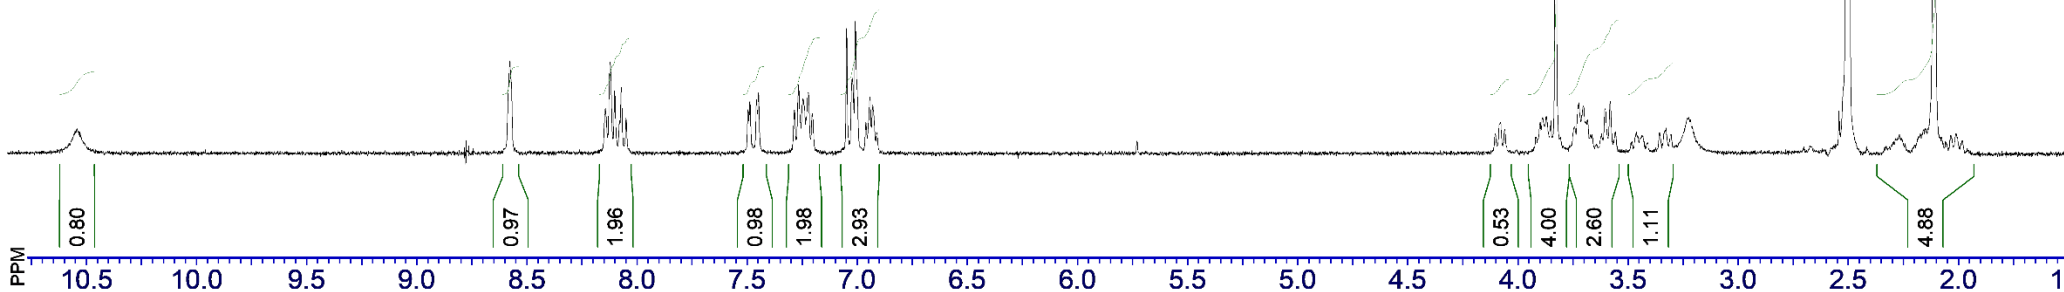

File name: F0687-0471-uns

Expert: M.Pyanova

SF: 400.0778 MHz; sw: 8000 Hz; at: 1.50 sec

NS: ; pw: 9,65 usec

SI: 65536, TD: 24000

Date: 02\_Nov\_2015

Solvent: DMSO 1028

TE: 293 K

block: S17224

## -.o.-Syntez Purity Report -.o.-

Agilent 1200 LC/MSD  
 Diodearray G1315B (DAD1A-215nm; DAD1B-240nm)  
 Mass Quad G6140A (MSD1-Pos, MSD2-Neg)  
 ELSD Altech 3300 (ADC1 A, ELSD)

Mobile Phase:A-H<sub>2</sub>O+0.1HCOOH;B-MeCN+0.1HCOOH  
 Separation col **100 %**  
 Rapid Resolutionn HPLC Cartidge 4.6x50mm,  
 1.8-Micron, Zorbax SB-C18

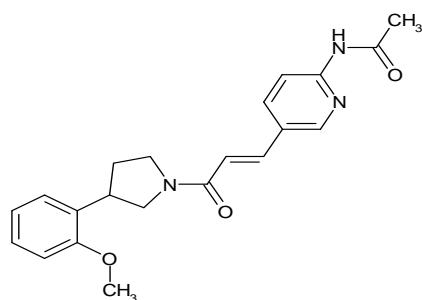

Mol.Weight: 365.43  
 Salt:

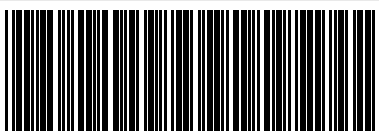

F0687-0471

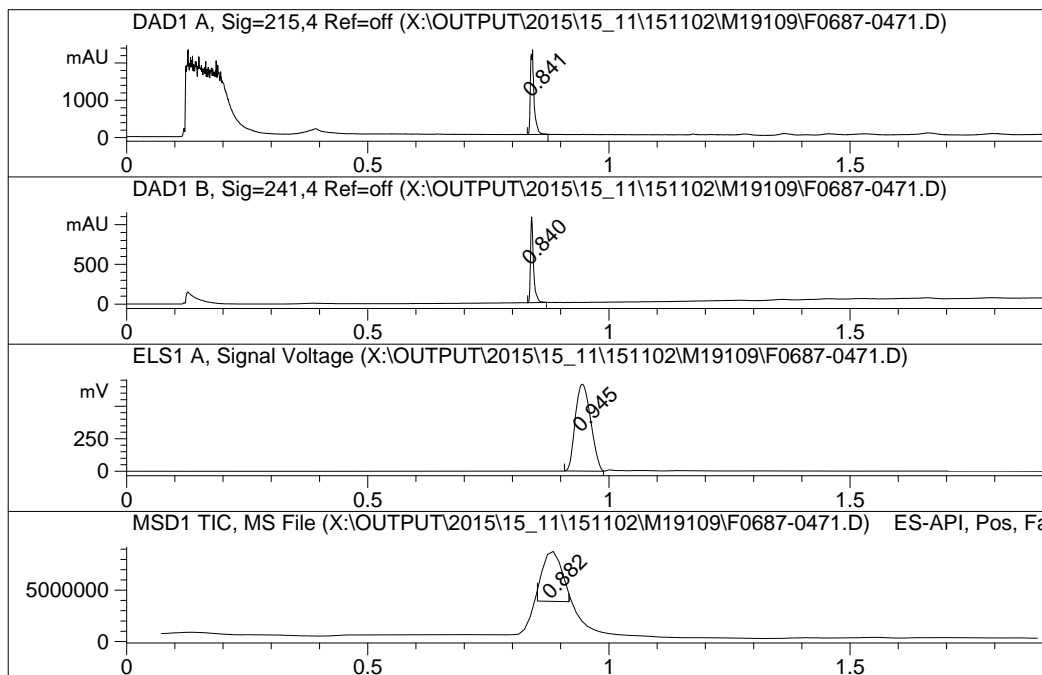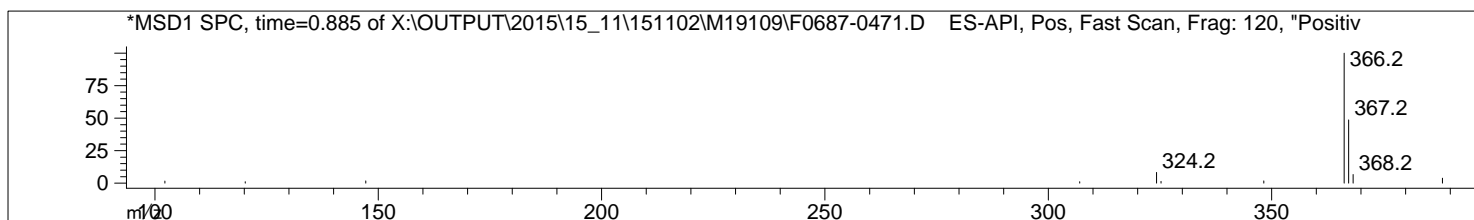

| # | Signal                    | R.Time | Area %  |
|---|---------------------------|--------|---------|
| 1 | DAD1 A, Sig=215,4 Ref=off | 0.841  | 100.000 |
| 1 | DAD1 B, Sig=241,4 Ref=off | 0.840  | 100.000 |
| 1 | ELS1 A, Signal Voltage    | 0.945  | 100.000 |
| 1 | MSD1 TIC, MS File         | 0.882  | 100.000 |

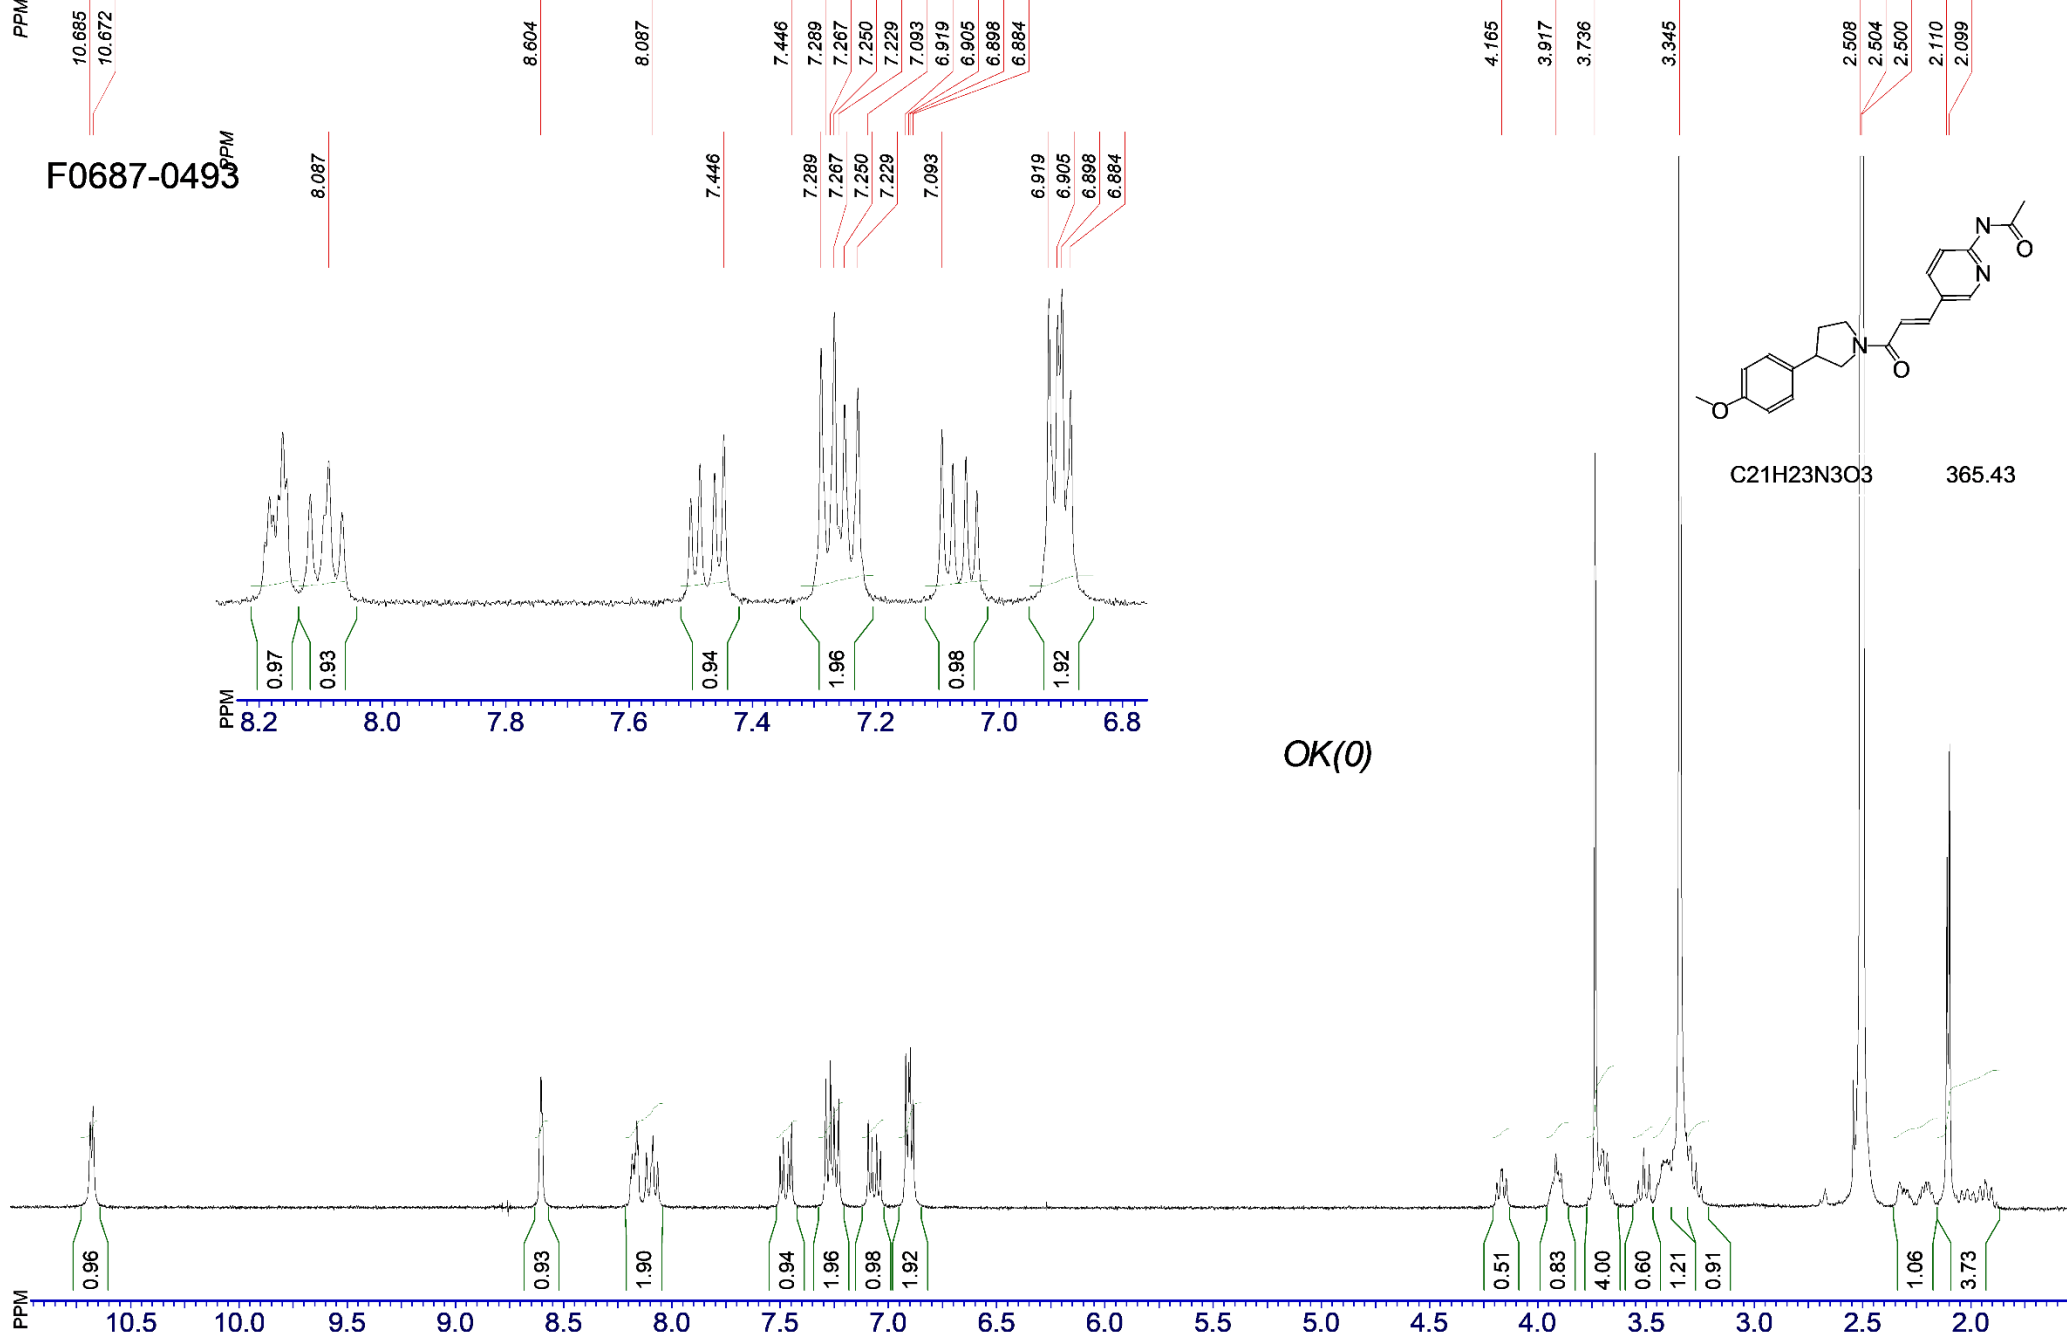

OK(0)

|                       |                    |                                             |                     |                      |
|-----------------------|--------------------|---------------------------------------------|---------------------|----------------------|
| File name: F0687-0493 | Expert: M.Pyanova  | SF: 400.0778 MHz; sw: 8000 Hz; at: 1.50 sec | NS: ; pw: 9,65 usec | SI: 65536, TD: 24000 |
| Date: 16_Dec_2015     | Solvent: DMSO 1211 |                                             | TE: 293 K           | block: S17697        |

-.o.-Syntez Purity Report -.o.-

Agilent 1100 LC/MSD SL  
 Diodearray G1315B (DAD1A-215nm; DAD1B-254nm)  
 Mass Quad G1956B (MSD1-Pos, MSD2-Neg)  
 ELSD Altech 3300 (ADC1 A, ELSD)

Mobile Phase:A-H<sub>2</sub>O+0.1%HCOOH;B-MeCN+0.1HCOOH  
 Separation colun **100 %**  
 Rapid Resolutionn HT Cartridge 4.6x30mm,  
 1.8-Micron, Zorbax SB C-18

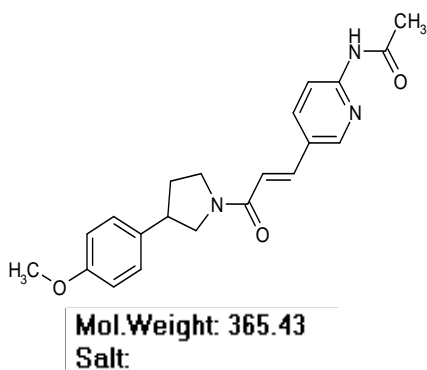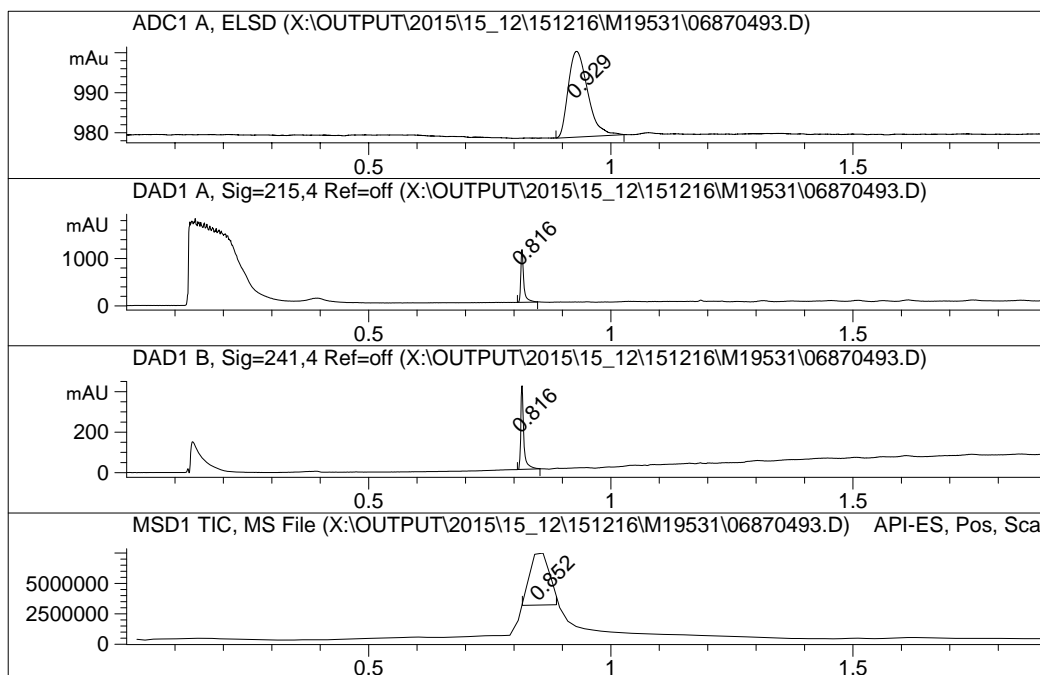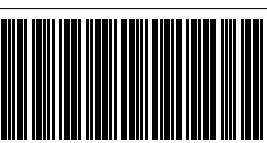

F0687-0493

151216-1 -&gt;

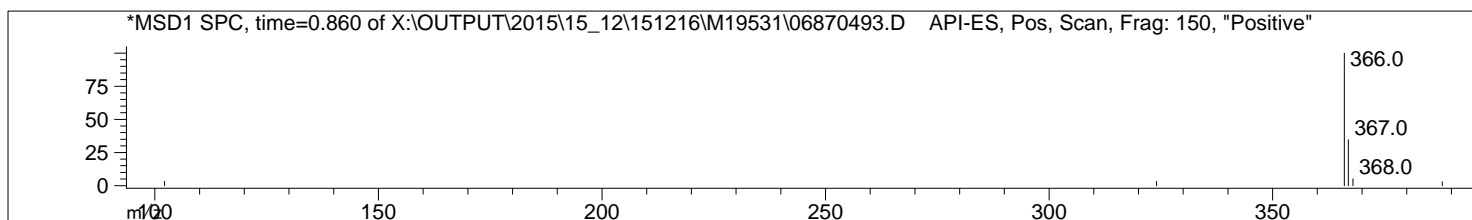

| # | Signal                    | R.Time | Area %  |
|---|---------------------------|--------|---------|
| 1 | ADC1 A, ELSD              | 0.929  | 100.000 |
| # | Signal                    | R.Time | Area %  |
| 1 | DAD1 A, Sig=215,4 Ref=off | 0.816  | 100.000 |
| # | Signal                    | R.Time | Area %  |
| 1 | DAD1 B, Sig=241,4 Ref=off | 0.816  | 100.000 |
| # | Signal                    | R.Time | Area %  |
| 1 | MSD1 TIC, MS File         | 0.852  | 100.000 |

PPM

F0687-0478

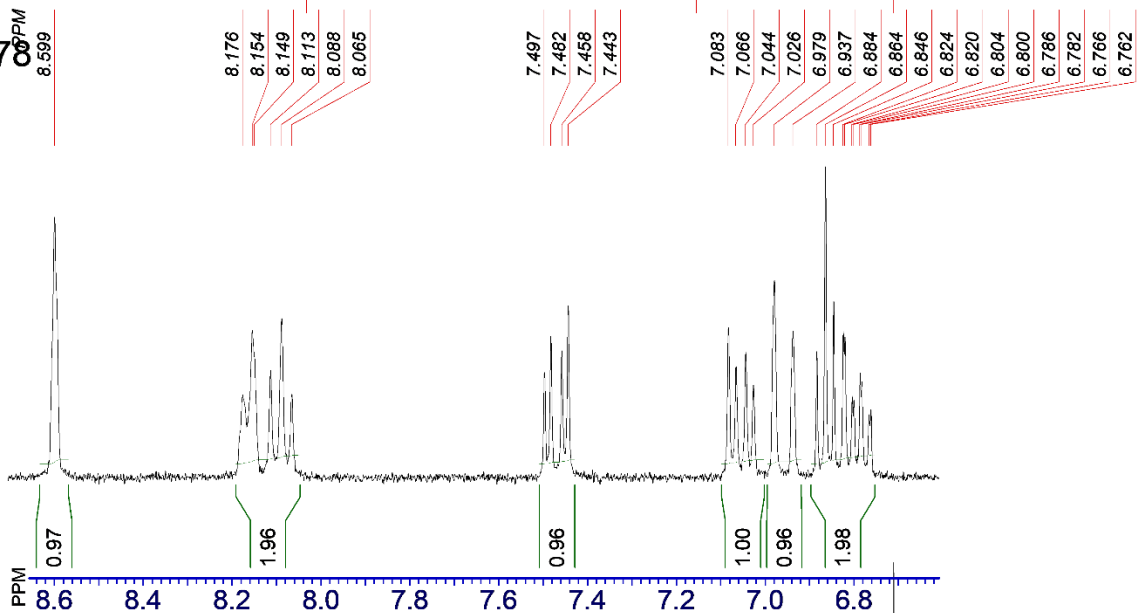

OK(0)

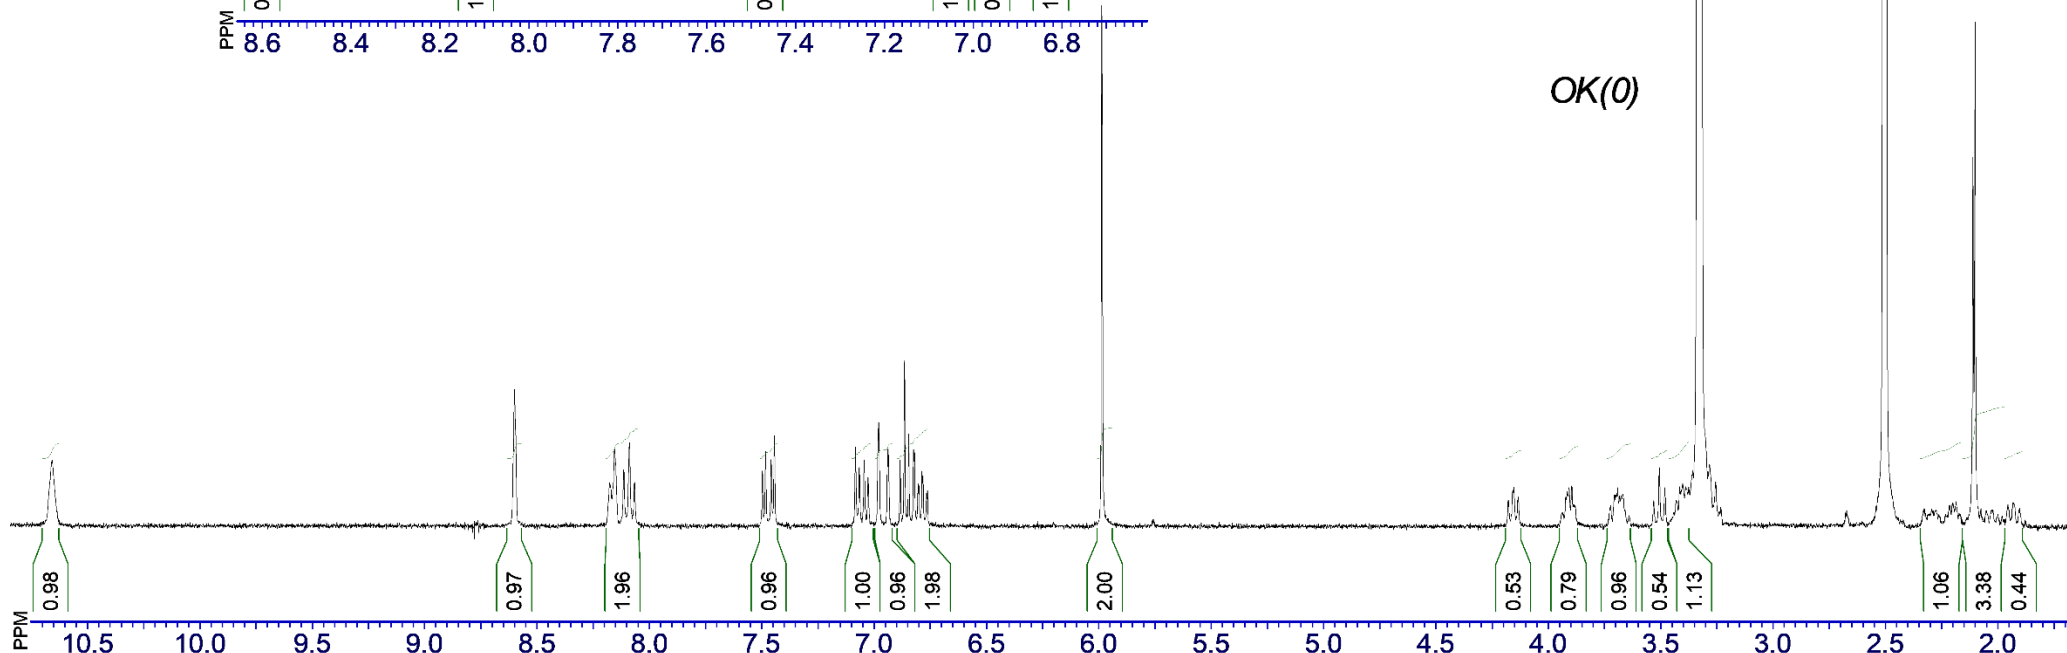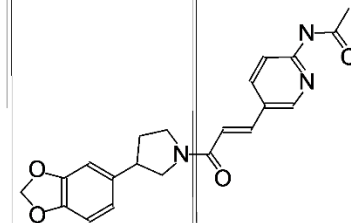

0 0 C<sub>21</sub>H<sub>21</sub>N<sub>3</sub>O<sub>4</sub>  
379.41

File name: F0687-0478

Expert: A.Ryabitsky

SF: 400.0778 MHz; sw: 8000 Hz; at: 1.50 sec

NS: ; pw: 9,65 usec

SI: 65536, TD: 24000

Date: 03\_nov\_2015

Solvent: DMSO new

TE: 293 K

block: S17233

- .o. - Syntez Purity Report - .o. -

Agilent 1200 LC/MSD  
Diodearray G1315B (DAD1A-215nm; DAD1B-240nm)  
Mass Quad G6140A (MSD1-Pos, MSD2-Neg)  
ELSD Altech 3300 (ADC1 A, ELSD)

Mobile Phase: A-H2O+0.1HCOOH; B-MeCN+0.1HCOOH  
Separation colun **99 %**  
Rapid Resolutionn HT Cartige 4.6x30mm,  
1.8-Micron, Zorbax SB-C18

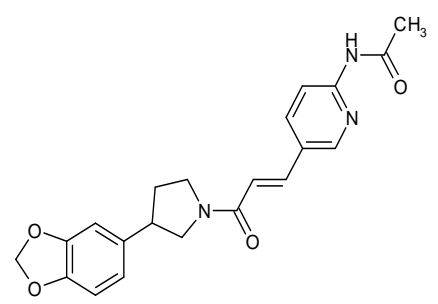

Mol.Weight: 379.41  
Salt:

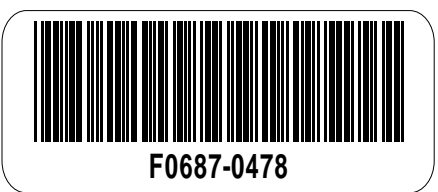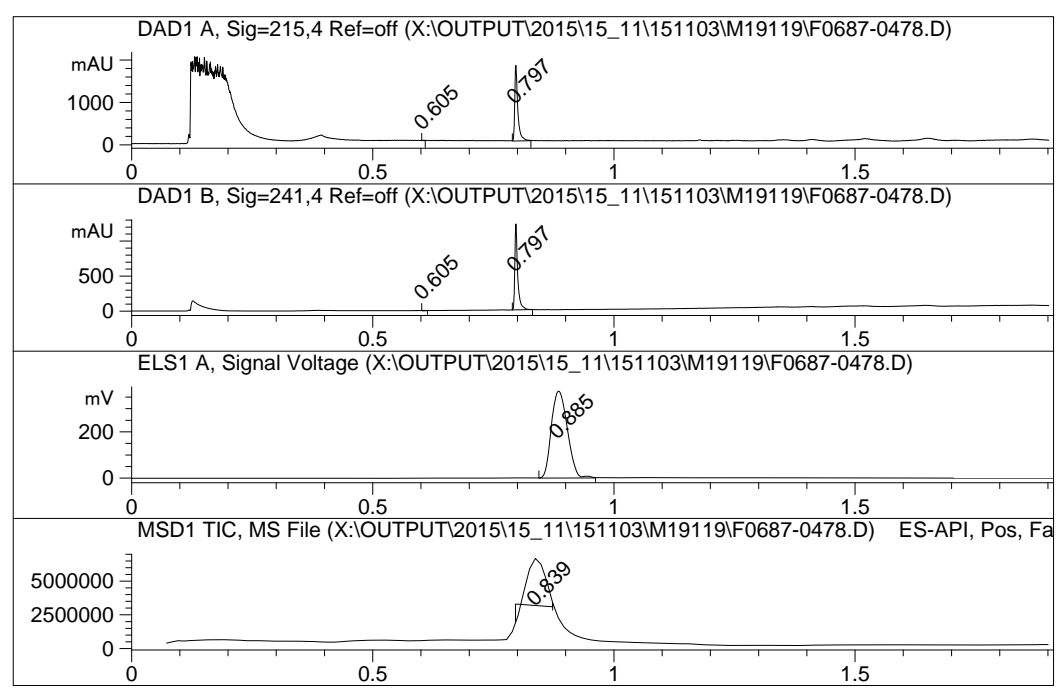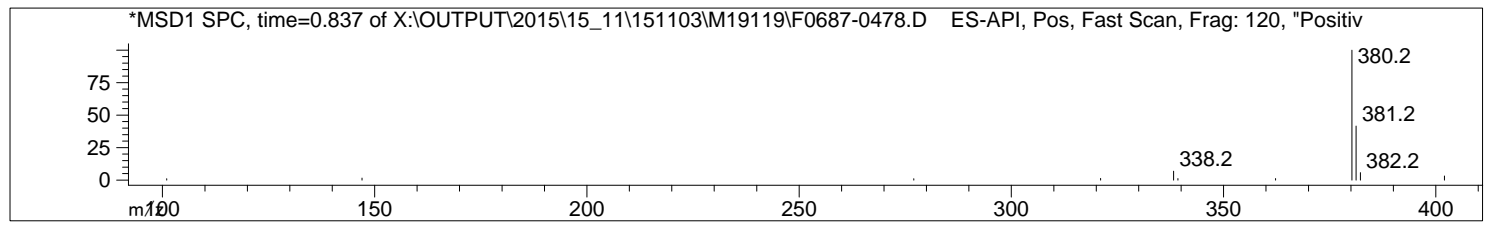

| #     | Signal                    | R.Time | Area %  |
|-------|---------------------------|--------|---------|
| 1     | DAD1 A, Sig=215,4 Ref=off | 0.605  | 0.240   |
| 2     |                           | 0.797  | 99.760  |
| ----- |                           |        |         |
| #     | Signal                    | R.Time | Area %  |
| 1     | DAD1 B, Sig=241,4 Ref=off | 0.605  | 0.516   |
| 2     |                           | 0.797  | 99.484  |
| ----- |                           |        |         |
| #     | Signal                    | R.Time | Area %  |
| 1     | ELS1 A, Signal Voltage    | 0.885  | 100.000 |
| ----- |                           |        |         |
| #     | Signal                    | R.Time | Area %  |
| 1     | MSD1 TIC, MS File         | 0.839  | 100.000 |

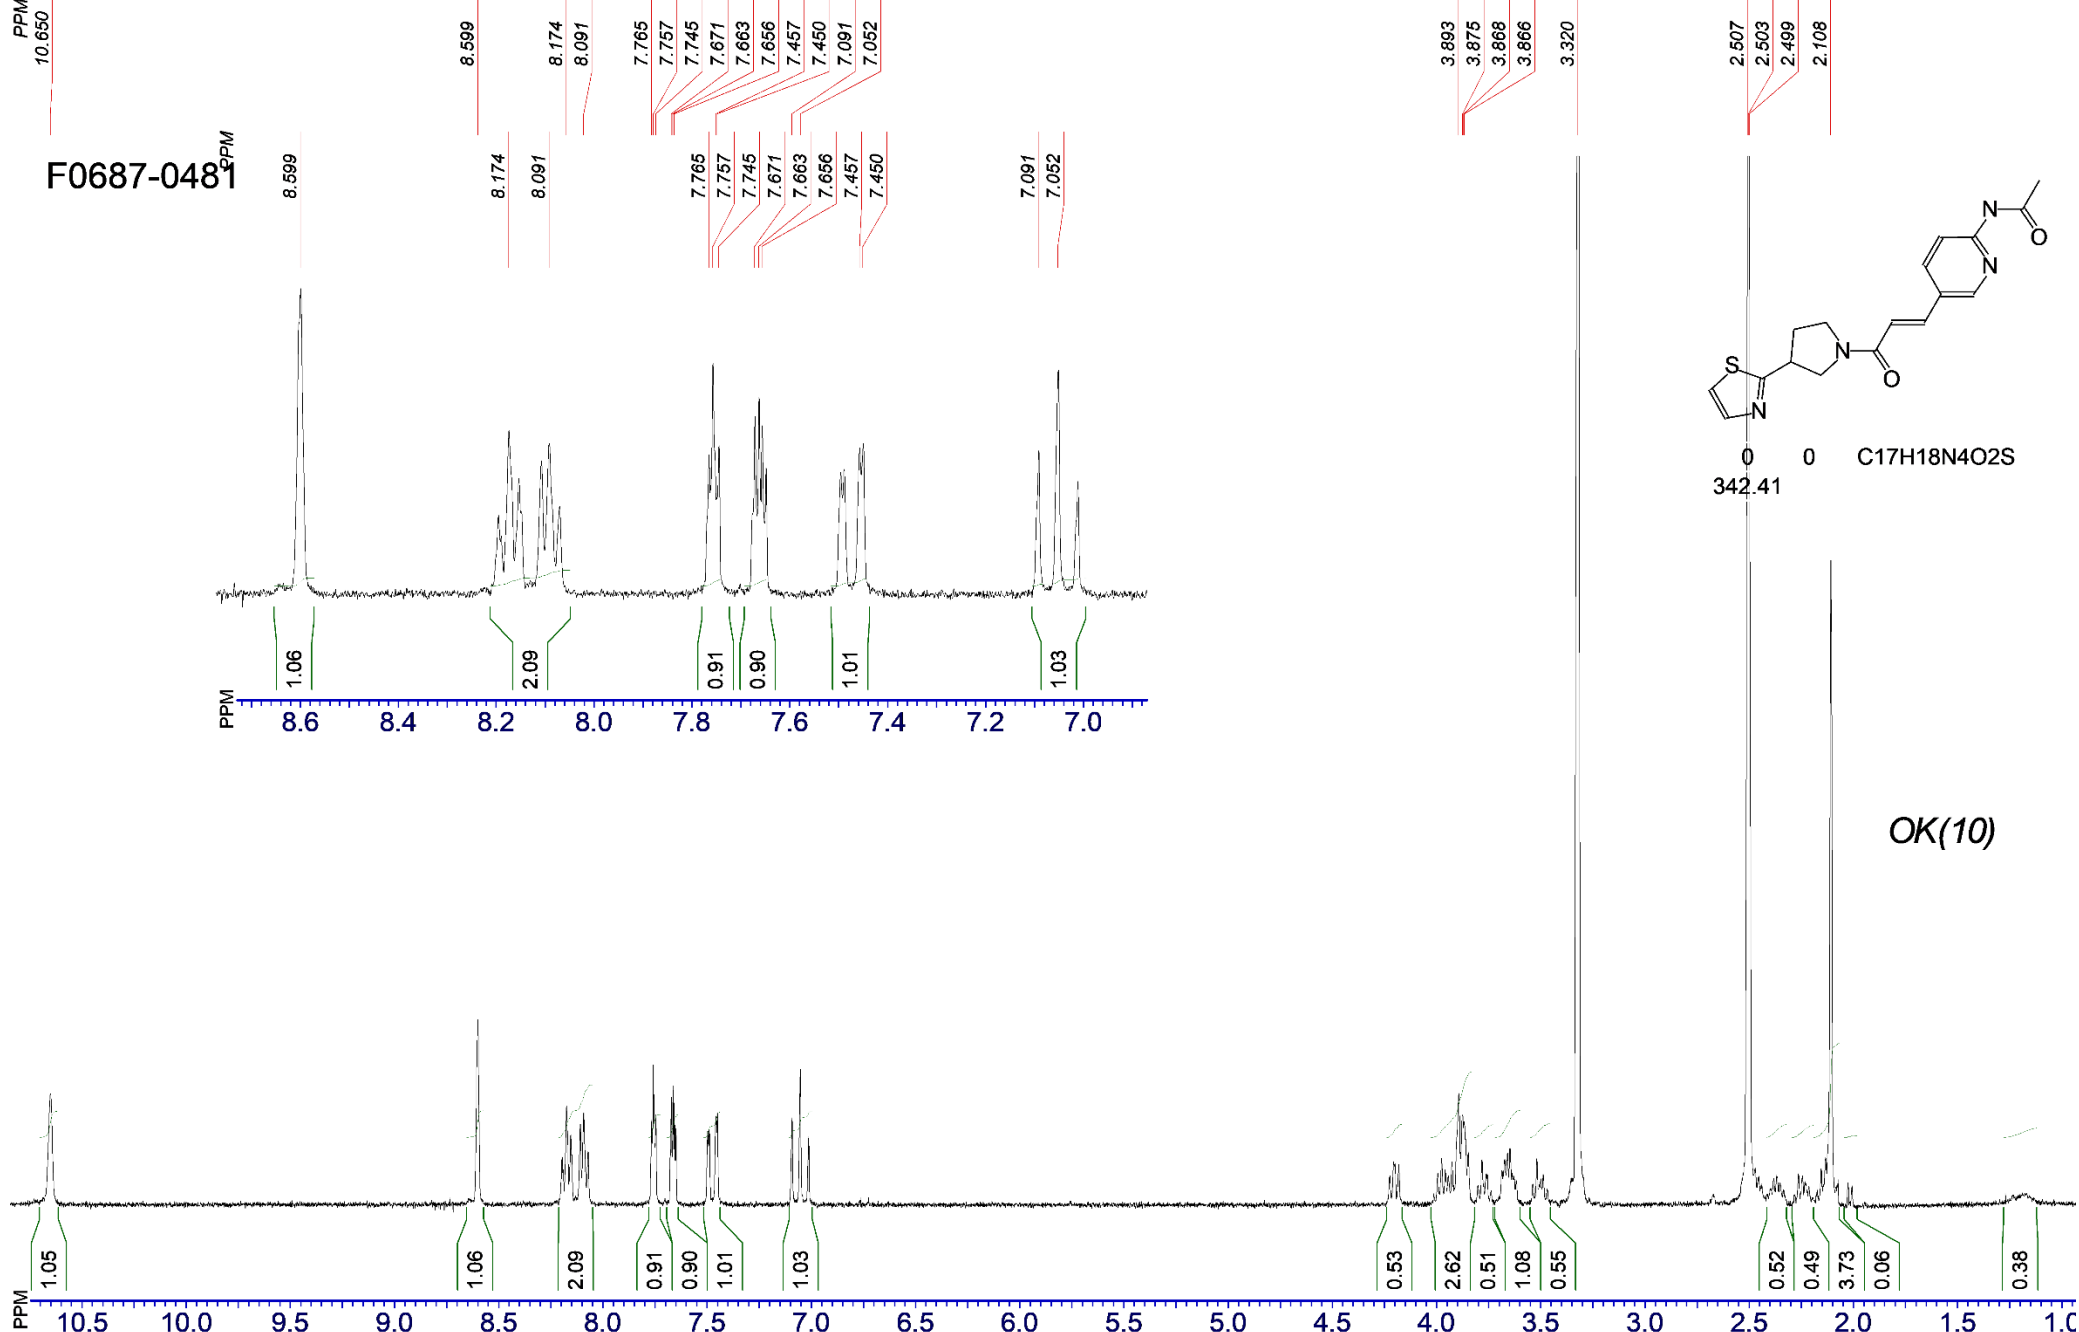

|                              |                     |                                             |                     |                      |
|------------------------------|---------------------|---------------------------------------------|---------------------|----------------------|
| File name: <b>F0687-0481</b> | Expert: A.Ryabitsky | SF: 400.0778 MHz; sw: 8000 Hz; at: 1.50 sec | NS: ; pw: 9,65 usec | SI: 65536, TD: 24000 |
| Date: 03_nov_2015            | Solvent: DMSO new   |                                             | TE: 293 K           | block: S17233        |



- .o.- Syntez Purity Report - .o.-

Agilent 1200 LC/MSD  
Diodearray G1315B (DAD1A-215nm; DAD1B-240nm)  
Mass Quad G6140A (MSD1-Pos, MSD2-Neg)  
ELSD Altech 3300 (ADC1 A, ELSD)

Mobile Phase: A-H2O+0.1HCOOH; B-MeCN+0.1HCOOH  
Separation colu **Non-informative**  
Rapid Resolutionn HT Cartige 4.6x30mm,  
1.8-Micron, Zorbax SB-C18

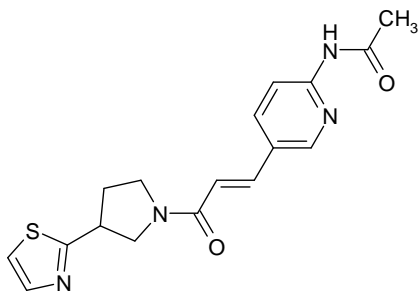

Mol.Weight: 342.42  
Salt:

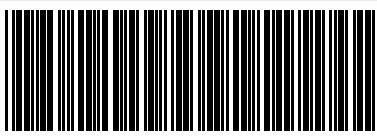

F0687-0481

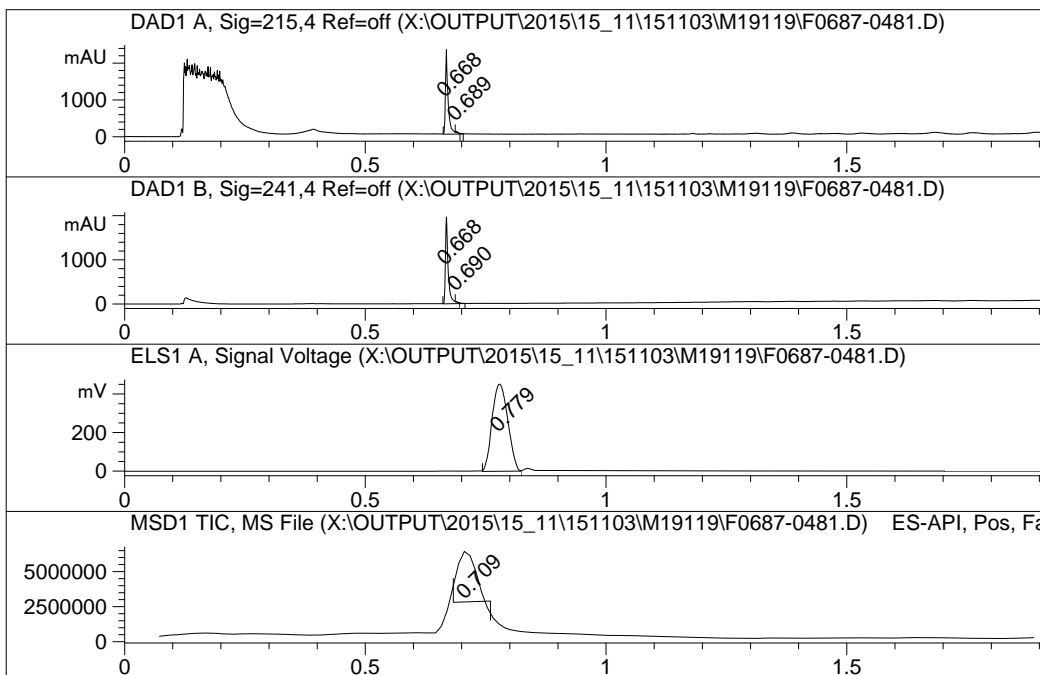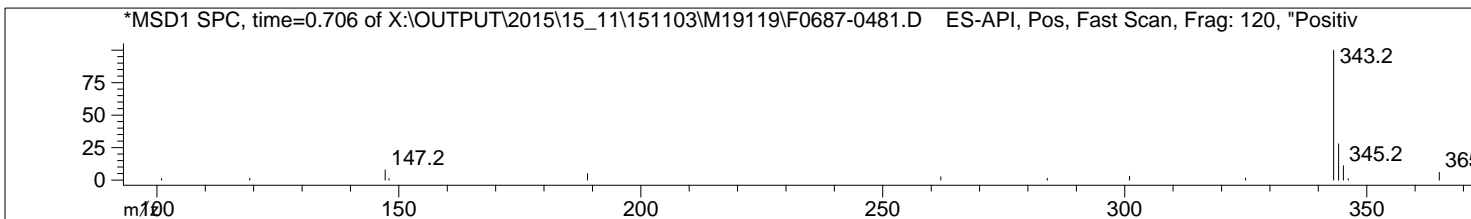

| # | Signal                    | R.Time | Area %  |
|---|---------------------------|--------|---------|
| 1 | DAD1 A, Sig=215,4 Ref=off | 0.668  | 98.872  |
| 2 |                           | 0.689  | 1.128   |
| # | Signal                    | R.Time | Area %  |
| 1 | DAD1 B, Sig=241,4 Ref=off | 0.668  | 99.639  |
| 2 |                           | 0.690  | 0.361   |
| # | Signal                    | R.Time | Area %  |
| 1 | ELS1 A, Signal Voltage    | 0.779  | 100.000 |
| # | Signal                    | R.Time | Area %  |
| 1 | MSD1 TIC, MS File         | 0.709  | 100.000 |



- .o.- Syntez Purity Report - .o.-

Agilent 1200 LC/MSD  
 Diodearray G1315B (DAD1A-215nm; DAD1B-240nm)  
 Mass Quad G6140A (MSD1-Pos, MSD2-Neg)  
 ELSD Altech 3300 (ADC1 A, ELSD)

Mobile Phase: A-H<sub>2</sub>O+0.1HCOOH; B-MeCN+0.1HCOOH  
 Separation column: **95%**  
 Rapid Resolutionn HT Cartige 4.6x30mm,  
 1.8-Micron, Zorbax SB-C18

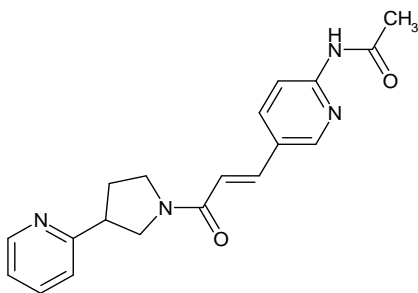

Mol.Weight: 336.39  
 Salt:

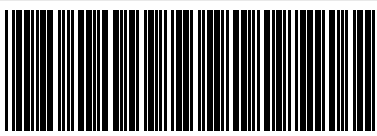

F0687-0475

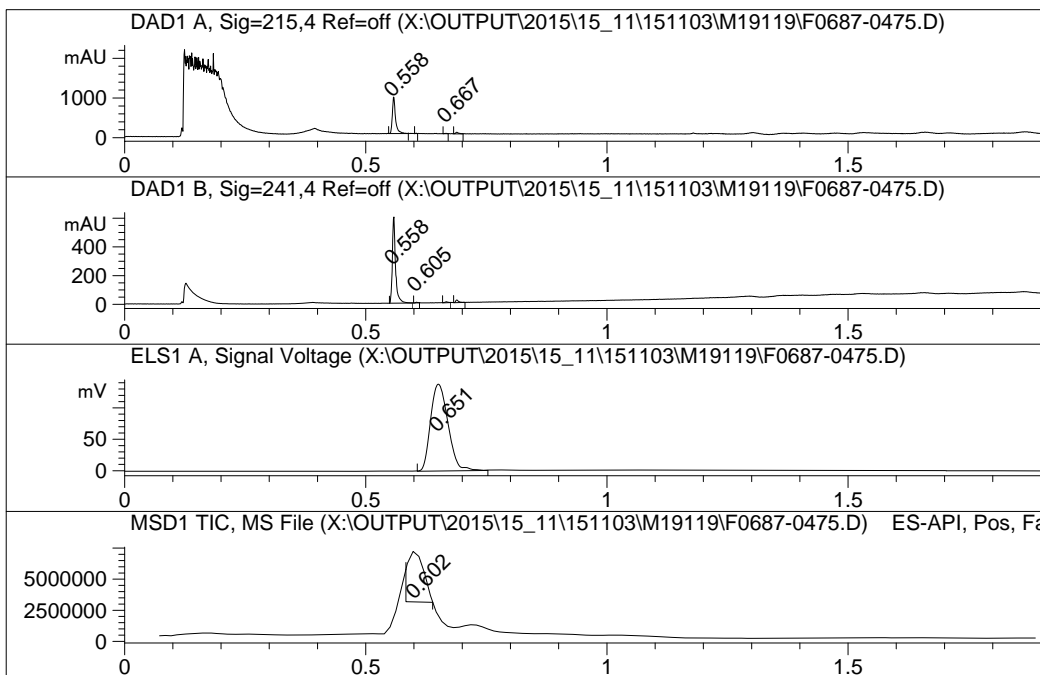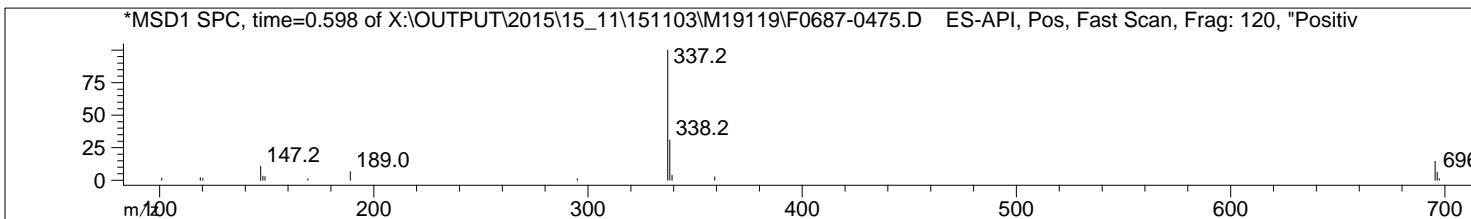

| #     | Signal                    | R.Time | Area %  |
|-------|---------------------------|--------|---------|
| 1     | DAD1 A, Sig=215,4 Ref=off | 0.558  | 95.055  |
| 2     |                           | 0.605  | 0.412   |
| 3     |                           | 0.667  | 0.902   |
| 4     |                           | 0.688  | 3.631   |
| ----- |                           |        |         |
| #     | Signal                    | R.Time | Area %  |
| 1     | DAD1 B, Sig=241,4 Ref=off | 0.558  | 95.697  |
| 2     |                           | 0.605  | 0.427   |
| 3     |                           | 0.667  | 1.169   |
| 4     |                           | 0.688  | 2.707   |
| ----- |                           |        |         |
| #     | Signal                    | R.Time | Area %  |
| 1     | ELS1 A, Signal Voltage    | 0.651  | 100.000 |
| ----- |                           |        |         |
| #     | Signal                    | R.Time | Area %  |
| 1     | MSD1 TIC, MS File         | 0.602  | 100.000 |

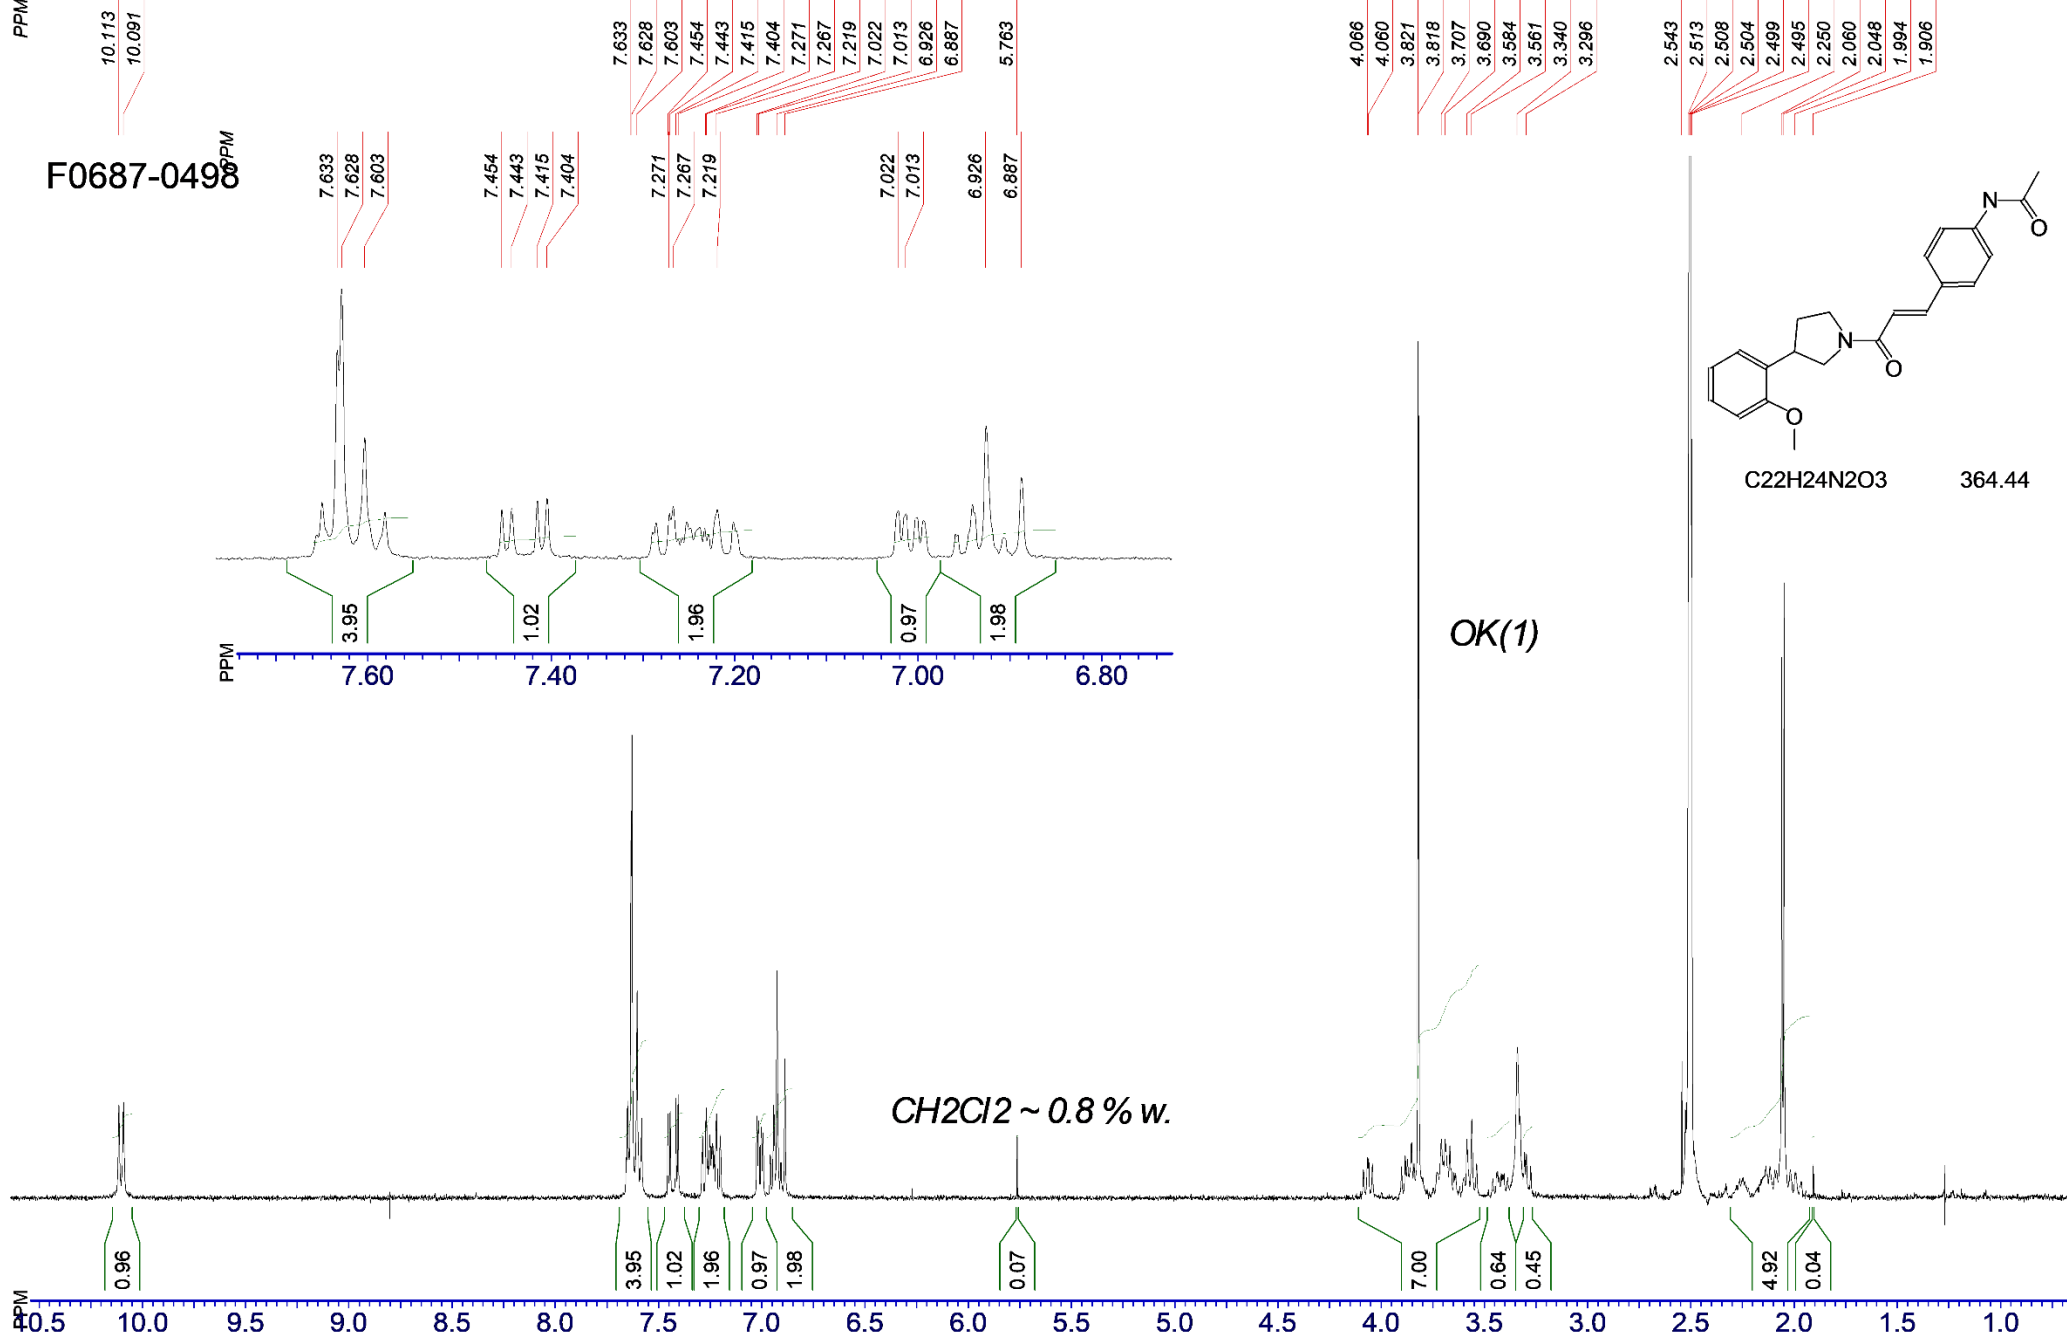

|                       |                    |                                             |                     |                      |
|-----------------------|--------------------|---------------------------------------------|---------------------|----------------------|
| File name: F0687-0498 | Expert: M.Pyanova  | SF: 400.0778 MHz; sw: 8000 Hz; at: 1.50 sec | NS: ; pw: 9,65 usec | SI: 65536, TD: 24000 |
| Date: 06_Apr_2016     | Solvent: DMSO 0325 |                                             | TE: 293 K           | block: S18865        |

## -.o.-Syntez Purity Report -.o.-

Agilent 1100 LC/MSD SL  
 Diodearray G1315B (DAD1A-215nm; DAD1B-254nm)  
 Mass Quad G1956B (MSD1-Pos, MSD2-Neg)  
 ELSD Altech 3300 (ADC1 A, ELSD)

Mobile Phase:A-H2O+0.1%HCOOH;B-MeCN+0.1HCOOH  
 Separation column:  
 Rapid Resolution II cartridge 1.0x250mm,  
 1.8-Micron, Zorbax SB C-18

99 %

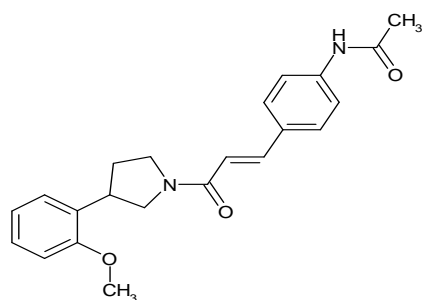

Mol.Weight: 364.44  
 Salt:

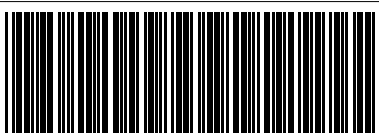

F0687-0498

160406 -&gt;

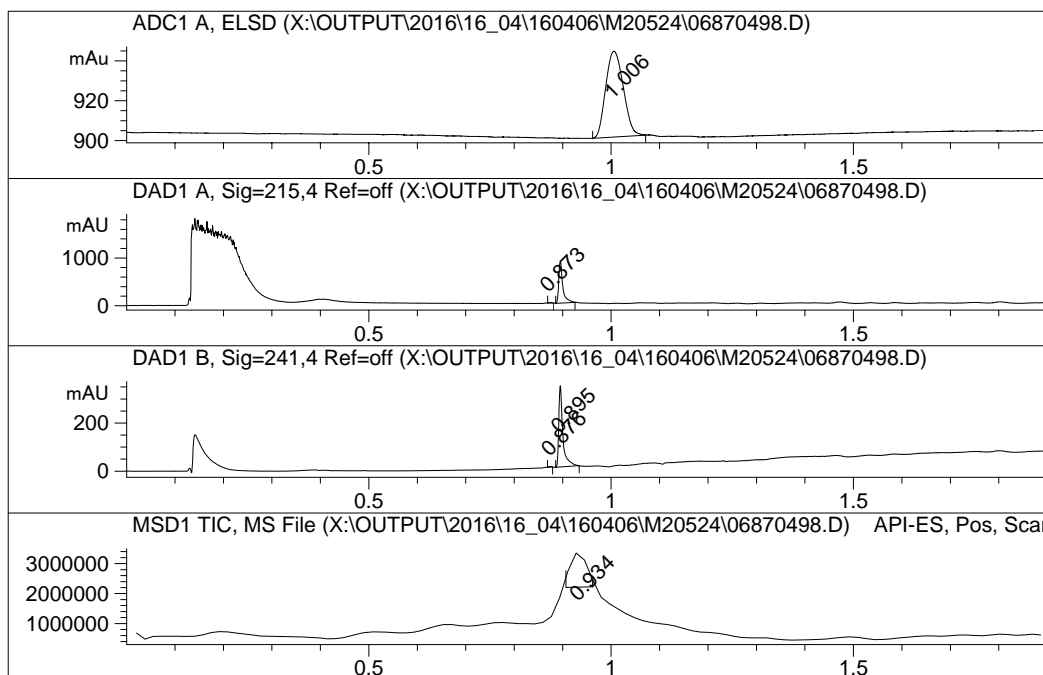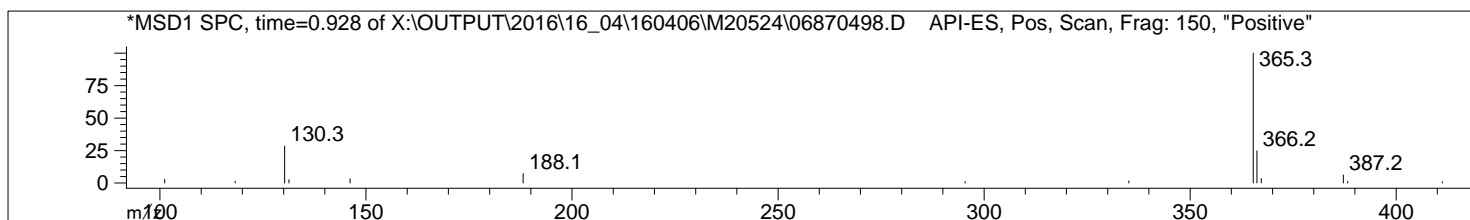

| # | Signal                    | R.Time | Area %  |
|---|---------------------------|--------|---------|
| 1 | ADC1 A, ELSD              | 1.006  | 100.000 |
| # | Signal                    | R.Time | Area %  |
| 1 | DAD1 A, Sig=215,4 Ref=off | 0.873  | 0.975   |
| 2 |                           | 0.895  | 99.025  |
| # | Signal                    | R.Time | Area %  |
| 1 | DAD1 B, Sig=241,4 Ref=off | 0.876  | 0.772   |
| 2 |                           | 0.895  | 99.228  |
| # | Signal                    | R.Time | Area %  |
| 1 | MSD1 TIC, MS File         | 0.934  | 100.000 |
